# Supplementary material for: POWERDRESS interacts with HISTONE DEACETYLASE 9 to promote aging in Arabidopsis
Source: eLife. 2016 Nov 22;5:e17214. doi: 10.7554/eLife.17214 (PMC5119886; doi:10.7554/eLife.17214)
Supplement: Figure 3—source data 1. — (A) List of HDA9 bound genes. (B) Genes showing HDA9 binding and upregulation in hda9. (C) Chromatin related proteins showing HDA9 binding. DOI: http://dx.doi.org/10.7554/eLife.17214.009 [file elife-17214-fig3-data1.xlsx]

## Sheet: A
Figure3-source data 1. HDA9 binds active genes
A. List of HDA9 bound genes
Accession	Annotation
AT1G01060	LHY encodes a myb-related putative transcription factor involved in circadian rhythm along with another myb transcription factor CCA1
AT1G01080	RNA-binding (RRM/RBD/RNP motifs) family protein:
AT1G01100	60S acidic ribosomal protein family:
AT1G01110	IQ-domain 18:
AT1G01115	unknown
AT1G01130	unknown
AT1G01140	CBL-interacting protein kinase 9:Encodes a CBL-interacting protein kinase with similarity to SOS2
AT1G01150	Homeodomain-like protein with RING/FYVE/PHD-type zinc finger domain:
AT1G01160	GRF1-interacting factor 2:Arabidopsis thaliana GRF1-interacting factor 2 (GIF2) mRNA
AT1G01170	Protein of unknown function (DUF1138):
AT1G01180	S-adenosyl-L-methionine-dependent methyltransferases superfamily protein:
AT1G01200	RAB GTPase homolog A3:
AT1G01220	L-fucokinase/GDP-L-fucose pyrophosphorylase:Encodes a bifunctional enzyme that has both L-fucokinase and GDP-L-fucose pyrophosphorylase activities. It catalyzes the two steps of the L-fucose salvage pathway for the generation of activated GDP-L-fucose. This pathway seems to be of minor importance for cell wall polysaccharide biosynthesis compared to the de novo GDP-L-fucose biosynthesis pathway i…
AT1G01225	NC domain-containing protein-related:
AT1G01230	ORMDL family protein:
AT1G01240	unknown
AT1G01260	basic helix-loop-helix (bHLH) DNA-binding superfamily protein:
AT1G01270	pre-tRNA:
AT1G01280	cytochrome P450, family 703, subfamily A, polypeptide 2:member of CYP703A CYP703A2 is expressed specifically in anthers of land plants, catalyzing the in-chain hydroxylation at the C-7 position of medium-chain saturated fatty acids (lauric acid in-chain hydroxylase) which is involved in pollen development (sporopollenin synthesis).
AT1G01290	cofactor of nitrate reductase and xanthine dehydrogenase 3:COFACTOR OF NITRATE REDUCTASE AND XANTHINE DEHYDROGENASE 3. Encodes a protein involved in molybdenum cofactor biosynthesis. Homologous to E.coli MoaC. Expression is low in all tissues examined, except in roots. Appears to have targeting signals for chloroplast or mitochondria
AT1G01300	Eukaryotic aspartyl protease family protein:
AT1G01310	CAP (Cysteine-rich secretory proteins, Antigen 5, and Pathogenesis-related 1 protein) superfamily protein:
AT1G01320	Tetratricopeptide repeat (TPR)-like superfamily protein:
AT1G01340	cyclic nucleotide gated channel 10:member of Cyclic nucleotide gated channel family
AT1G01350	Zinc finger (CCCH-type/C3HC4-type RING finger) family protein:
AT1G01370	Histone superfamily protein:Encodes a centromere-identifying protein histone H3 variant. Localized at centromeres in both mitotic and meiotic cells.
AT1G01380	Homeodomain-like superfamily protein:ETC1 is involved in trichome and root hair patterning in Arabidopsis.
AT1G01420	UDP-glucosyl transferase 72B3:
AT1G01430	TRICHOME BIREFRINGENCE-LIKE 25:Encodes a member of the TBL (TRICHOME BIREFRINGENCE-LIKE) gene family containing a plant-specific DUF231 (domain of unknown function) domain. TBL gene family has 46 members, two of which (TBR/AT5G06700 and TBL3/AT5G01360) have been shown to be involved in the synthesis and deposition of secondary wall cellulose, presumably by influencing the esterification state of …
AT1G01470	Late embryogenesis abundant protein:Encodes late-embryogenesis abundant protein whose mRNA levels are induced in response to wounding and light stress. Might be involved in protection against dessication.
AT1G01471	unknown
AT1G01480	1-amino-cyclopropane-1-carboxylate synthase 2:a member of the 1-aminocyclopropane-1-carboxylate (ACC) synthase (S-adenosyl-L-methionine methylthioadenosine-lyase, EC 4.4.1.14) gene family, isolated from a flower-specific cDNA library.
AT1G01490	Heavy metal transport/detoxification superfamily protein :
AT1G01500	Erythronate-4-phosphate dehydrogenase family protein:
AT1G01510	NAD(P)-binding Rossmann-fold superfamily protein:Encodes a homolog of human CtBP. Mutant has longer and thicker leaves than wild type. Involved in controlling polar cell expansion in the leaf width direction.
AT1G01520	Homeodomain-like superfamily protein:
AT1G01530	AGAMOUS-like 28:
AT1G01540	Protein kinase superfamily protein:
AT1G01550	Protein of unknown function (DUF793):BYPASS1, required to prevent constitutive production of a root-derived graft-transmissible signal
AT1G01560	MAP kinase 11:member of MAP Kinase
AT1G01570	Protein of unknown function (DUF604):
AT1G01580	ferric reduction oxidase 2:Encodes the low-iron-inducible ferric chelate reductase responsible for reduction of iron at the root surface. It is likely to be the major Fe(III) chelate reductase in Arabidopsis iron metabolism. Coordinately regulated with IRT1, the major transporter responsible for high-affinity iron uptake from the soil, at both transcriptional and posttranscriptional levels. Stead…
AT1G01600	cytochrome P450, family 86, subfamily A, polypeptide 4:Encodes a member of the CYP86A subfamily of cytochrome p450 genes. Expressed significantly at highest level in mature stems and flowers.
AT1G01620	plasma membrane intrinsic protein 1C:a member of the plasma membrane intrinsic protein subfamily PIP1. localizes to the plasma membrane and exhibits water transport activity in Xenopus oocyte. expressed ubiquitously and protein level decreases slightly during leaf development.
AT1G01630	Sec14p-like phosphatidylinositol transfer family protein:
AT1G01680	plant U-box 54:
AT1G01690	putative recombination initiation defects 3:Encodes a novel plant-specific protein that is involved in meiotic double strand break formation.
AT1G01700	RHO guanyl-nucleotide exchange factor 2:Encodes a member of KPP-like gene family, homolog of KPP (kinase partner protein) gene in tomato. Also a member of the RopGEF (guanine nucleotide exchange factor) family, containing the novel PRONE domain (plant-specific Rop nucleotide exchanger), which is exclusively active towards members of the Rop subfamily.
AT1G01710	Acyl-CoA thioesterase family protein:
AT1G01720	NAC (No Apical Meristem) domain transcriptional regulator superfamily protein:Belongs to a large family of putative transcriptional activators with NAC domain. Transcript level increases in response to wounding and abscisic acid. ATAF1 attentuates ABA signaling and sythesis. Mutants are hyposensitive to ABA.
AT1G01725	unknown
AT1G01730	unknown
AT1G01740	Protein kinase protein with tetratricopeptide repeat domain:
AT1G01750	actin depolymerizing factor 11:
AT1G01760	adenosine deaminases;RNA binding;RNA binding;adenosine deaminases:
AT1G01770	unknown
AT1G01790	K+ efflux antiporter 1:K efflux antiporter KEA1
AT1G01810	unknown
AT1G01820	peroxin 11c:member of the peroxin11 (PEX11) gene family, integral to peroxisome membrane, controls peroxisome proliferation.
AT1G01830	ARM repeat superfamily protein:
AT1G01840	unknown
AT1G01940	Cyclophilin-like peptidyl-prolyl cis-trans isomerase family protein:
AT1G01950	armadillo repeat kinesin 2:Encodes a member of the armadillo/beta-catenin repeat kinesin motor family. Mutants have twisted roots due to abnormal cell file rotation; the phenotype is dependent on microtubules.
AT1G01960	SEC7-like guanine nucleotide exchange family protein:
AT1G01970	Tetratricopeptide repeat (TPR)-like superfamily protein:
AT1G01990	unknown
AT1G02065	squamosa promoter binding protein-like 8:Encodes an SBP-box gene, a member of the SPL gene family. Mutants are affected in micro- and megasporogenesis, trichome formation on sepals, and stamen filament elongation.
AT1G02080	transcription regulators:
AT1G02090	Proteasome component (PCI) domain protein:encodes a phosphoprotein that is a subunit of the COP9 signalosome. Mutants exhibit constitutive photomorphogenic phenotype.
AT1G02100	Leucine carboxyl methyltransferase:
AT1G02110	Protein of unknown function (DUF630 and DUF632):
AT1G02150	Tetratricopeptide repeat (TPR)-like superfamily protein:
AT1G02160	Cox19 family protein (CHCH motif):
AT1G02170	metacaspase 1:Metacaspase AtMCP1b. Arginine/lysine-specific cysteine protease activity. Induces apoptosis in yeast. Contains Pfam profile PF00656: ICE-like protease (caspase) p20 domain
AT1G02180	ferredoxin-related:
AT1G02190	Fatty acid hydroxylase superfamily:
AT1G02220	NAC domain containing protein 3:
AT1G02230	NAC domain containing protein 4:
AT1G02290	unknown
AT1G02300	Cysteine proteinases superfamily protein:
AT1G02305	Cysteine proteinases superfamily protein:
AT1G02330	unknown
AT1G02340	basic helix-loop-helix (bHLH) DNA-binding superfamily protein:Encodes a light-inducible, nuclear bHLH protein involved in phytochrome signaling. Mutants exhibit a long-hypocotyl phenotype only under far-red light but not under red light and are defective in other phytochrome A-related responses. Mutants also show blue light response defects. HFR1 interacts with COP1, co-localizes to the nuclear s…
AT1G02350	protoporphyrinogen oxidase-related:
AT1G02360	Chitinase family protein:
AT1G02420	Pentatricopeptide repeat (PPR) superfamily protein:
AT1G02470	Polyketide cyclase/dehydrase and lipid transport superfamily protein:
AT1G02475	Polyketide cyclase/dehydrase and lipid transport superfamily protein:
AT1G02480	pre-tRNA:
AT1G02490	unknown
AT1G02500	S-adenosylmethionine synthetase 1:encodes a S-adenosylmethionine synthetase. SAM1 is regulated by protein S-nitrosylation. The covalent binding of nitric oxide (NO) to the Cys114 residue inhibits the enzyme activity.
AT1G02510	Outward rectifying potassium channel protein:Encodes AtTPK4, a member of the Arabidopsis thaliana K+ channel family of AtTPK/KCO proteins. AtTPK4 is targeted to the plasma membrane. In contrast other members of the AtTPK proteins are located in tonoplast. AtTPK4 forms a voltage-independent K+ channel that is blocked by extracellular calcium ions. May form homomeric ion channels in vivo.
AT1G02560	nuclear encoded CLP protease 5:One of several nuclear-encoded ClpPs (caseinolytic protease). Contains a highly conserved catalytic triad of Ser-type proteases (Ser-His-Asp). The name reflects nomenclature described in Adam et. al (2001).
AT1G02590	Aldehyde oxidase/xanthine dehydrogenase, molybdopterin binding protein:
AT1G02600	pre-tRNA:
AT1G02610	RING/FYVE/PHD zinc finger superfamily protein:
AT1G02620	Ras-related small GTP-binding family protein:
AT1G02640	beta-xylosidase 2:encodes a protein similar to a beta-xylosidase located in the extracellular matrix. This is a member of glycosyl hydrolase family 3 and has six other closely related members.
AT1G02660	alpha/beta-Hydrolases superfamily protein:
AT1G02670	P-loop containing nucleoside triphosphate hydrolases superfamily protein:
AT1G02690	importin alpha isoform 6:Putative importin alpha isoform. When overexpressed can rescue the impa-4 decreased transformation susceptibility phenotype.
AT1G02740	MRG family protein:
AT1G02750	Drought-responsive family protein:
AT1G02813	Protein of unknown function, DUF538:
AT1G02816	Protein of unknown function, DUF538:
AT1G02830	Ribosomal L22e protein family:
AT1G02840	RNA-binding (RRM/RBD/RNP motifs) family protein:SR1 is a plant homologue of the human general/alternative splicing factor SF2/ASF.
AT1G02880	thiamin pyrophosphokinase1:Encodes a thiamine pyrophosphokinase capable of producing thiamine pyrophosphate from free thiamine.
AT1G02890	AAA-type ATPase family protein:
AT1G02920	glutathione S-transferase 7:Encodes glutathione transferase belonging to the phi class of GSTs. Naming convention according to Wagner et al. (2002).
AT1G02930	glutathione S-transferase 6:Encodes glutathione transferase belonging to the phi class of GSTs. Naming convention according to Wagner et al. (2002).
AT1G02965	unknown
AT1G02970	WEE1 kinase homolog:Protein kinase that negatively regulates the entry into mitosis.
AT1G02990	unknown
AT1G03030	P-loop containing nucleoside triphosphate hydrolases superfamily protein:
AT1G03060	Beige/BEACH domain ;WD domain, G-beta repeat protein:Encodes a WD/BEACH domain protein involved in cell morphogenesis.
AT1G03070	Bax inhibitor-1 family protein:
AT1G03080	kinase interacting (KIP1-like) family protein:
AT1G03090	methylcrotonyl-CoA carboxylase alpha chain, mitochondrial / 3-methylcrotonyl-CoA carboxylase 1 (MCCA):MCCA is the biotinylated subunit of the dimer MCCase, which is involved in leucine degradation. Both subunits are nuclear coded and the active enzyme is located in the mitochondrion.
AT1G03106	unknown
AT1G03110	Transducin/WD40 repeat-like superfamily protein:
AT1G03120	responsive to abscisic acid 28:Atrab28 plays a role in the ion cell balance during late embryogenesis and germination.
AT1G03130	photosystem I subunit D-2:Encodes a protein predicted by sequence similarity with spinach PsaD to be photosystem I reaction center subunit II (PsaD2)
AT1G03140	splicing factor Prp18 family protein:
AT1G03200	unknown
AT1G03220	Eukaryotic aspartyl protease family protein:
AT1G03230	Eukaryotic aspartyl protease family protein:
AT1G03260	SNARE associated Golgi protein family:
AT1G03270	CBS domain-containing protein with a domain of unknown function (DUF21):
AT1G03290	unknown
AT1G03300	DOMAIN OF UNKNOWN FUNCTION 724 1:Member of the plant-specific DUF724 protein family. Arabidopsis has 10 DUF724 proteins. Loss of function mutant has a WT phenotype
AT1G03310	debranching enzyme 1:Encodes a protein with strong similarity to isoamylase (EC:3.2.1.68) however lacks critical residues known to be important for activity. Appears to co localize with ISA1 in the chloroplast isoamylase complex. Mutations in this gene cause the loss of detectable isoamylase activity and the disruption of normal starch structure. It has been postulated that AtISA2 interacts with …
AT1G03370	C2 calcium/lipid-binding and GRAM domain containing protein:
AT1G03410	2-oxoglutarate (2OG) and Fe(II)-dependent oxygenase superfamily protein:
AT1G03430	histidine-containing phosphotransfer factor 5:Encodes AHP5, one of the six Arabidopsis thaliana histidine phosphotransfer proteins (AHPs). AHPs function as redundant positive regulators of cytokinin signaling. Members of the AHP gene family include: AT3G21510 (AHP1), AT3G29350 (AHP2), AT5G39340 (AHP3), AT3G16360 (AHP4), AT1G03430 (AHP5) and AT1G80100 (AHP6).
AT1G03470	Kinase interacting (KIP1-like) family protein:
AT1G03475	Coproporphyrinogen III oxidase:Encodes coproporphyrinogen III oxidase, a key enzyme in the biosynthetic pathway of chlorophyll and heme, a tetrapyrrole pathway. Mutants express cytological and molecular markers associated with the defense responses, usually activated by pathogen infection.
AT1G03490	NAC domain containing protein 6:
AT1G03510	Tetratricopeptide repeat (TPR)-like superfamily protein:
AT1G03515	pre-tRNA:
AT1G03520	Core-2/I-branching beta-1,6-N-acetylglucosaminyltransferase family protein:
AT1G03590	Protein phosphatase 2C family protein:
AT1G03600	photosystem II family protein:
AT1G03610	Protein of unknown function (DUF789):
AT1G03630	protochlorophyllide oxidoreductase C:Encodes for a protein with protochlorophyllide oxidoreductase activity. The enzyme is NADPH- and light-dependent.
AT1G03640	pre-tRNA:
AT1G03680	thioredoxin M-type 1:encodes a chloroplast thioredoxin similar to prokaryotic thioredoxins.
AT1G03687	DTW domain-containing protein:
AT1G03730	unknown
AT1G03740	Protein kinase superfamily protein:
AT1G03743	snoRNA:
AT1G03746	snoRNA:
AT1G03750	switch 2:
AT1G03780	targeting protein for XKLP2:Homolog of vertebrate TPX2. Protein has three domains involved in nuclear targeting, one in nuclear export and two in microtubule binding. Involved in mitotic spindle assembly during late prophase and early prometaphase.
AT1G03800	ERF domain protein 10:encodes a member of the ERF (ethylene response factor) subfamily B-1 of ERF/AP2 transcription factor family (ATERF-10). The protein contains one AP2 domain. There are 15 members in this subfamily including ATERF-3, ATERF-4, ATERF-7, and leafy petiole.
AT1G03810	Nucleic acid-binding, OB-fold-like protein:
AT1G03830	guanylate-binding family protein:
AT1G03850	Glutaredoxin family protein:
AT1G03860	prohibitin 2:prohibitin 2
AT1G03870	FASCICLIN-like arabinoogalactan 9:fasciclin-like arabinogalactan-protein 9 (Fla9)
AT1G03905	P-loop containing nucleoside triphosphate hydrolases superfamily protein:
AT1G03930	dual specificity kinase 1:Phosphorylates serine, threonine, and tyrosine
AT1G03935	snoRNA:
AT1G03940	HXXXD-type acyl-transferase family protein:
AT1G03950	vacuolar protein sorting-associated protein 2.3:
AT1G03970	G-box binding factor 4:encodes a basic leucine zipper G-box binding factor that can bind to G-box motifs only as heterodimers with GBF2 or GBF3. A single amino acid change can confer G-box binding as homodimers.
AT1G03982	PAK-box/P21-Rho-binding family protein:
AT1G03990	Long-chain fatty alcohol dehydrogenase family protein:
AT1G04000	unknown
AT1G04010	phospholipid sterol acyl transferase 1:
AT1G04020	breast cancer associated RING 1:Encodes a protein containing two tandem BRCA1 C-Terminal (BRCT) domains, which function in phosphorylation-dependent proteinÂ–protein interactions.Loss of function mutations cause defects in meristem organization due to failure to repress WUS. BARD1 binds to WUS promoter and over expression of BARD reduces the extent of WUS expression.
AT1G04050	homolog of SU(var)3-9 1:Encodes SUVR1, one of the four closely related Arabidopsis SUVR proteins that belong to the SU(VAR)3-9 subgroup of SET-domain proteins. Proteins containing the evolutionarily conserved SET domain are involved in regulation of eukaryotic gene expression and chromatin structure through their histone lysine methyltransferase (HMTase) activity. SUVR1, SUVR2 and SUVR4 proteins …
AT1G04120	multidrug resistance-associated protein 5:encodes a high-affinity inositol hexakisphosphate transporter that plays a role in guard cell signaling and phytate storage. It is a member of MRP subfamily / ABC transporter subfamily C.
AT1G04130	Tetratricopeptide repeat (TPR)-like superfamily protein:
AT1G04150	C2 calcium/lipid-binding plant phosphoribosyltransferase family protein:
AT1G04160	myosin XI B:Encodes a member of the type XI myosin protein family involved in root hair elongation.
AT1G04170	eukaryotic translation initiation factor 2 gamma subunit:protein synthesis initiation factor eIF2 gamma
AT1G04210	Leucine-rich repeat protein kinase family protein:Encodes a putative Raf-related kinase.
AT1G04230	Protein of unknown function (DUF2361):
AT1G04240	AUX/IAA transcriptional regulator family protein:SHY2/IAA3 regulates multiple auxin responses in roots. It is induced rapidly by IAA, and has been shown to be phosphorylated by oat phytochrome A in vitro.
AT1G04270	cytosolic ribosomal protein S15:Encodes cytosolic ribosomal protein S15.
AT1G04280	P-loop containing nucleoside triphosphate hydrolases superfamily protein:
AT1G04340	HR-like lesion-inducing protein-related:
AT1G04350	2-oxoglutarate (2OG) and Fe(II)-dependent oxygenase superfamily protein:encodes a protein whose sequence is similar to 2-oxoglutarate-dependent dioxygenase
AT1G04400	cryptochrome 2:Blue light receptor mediating blue-light regulated cotyledon expansion and flowering time. Positive regulator of the flowering-time gene CONSTANS. This gene possesses a light-induced CNT2 N-terminal homodimerisation domain.Involved in blue-light induced stomatal opening. Involved in triggering chromatin decondensation. An 80-residue motif (NC80) is sufficient to confer CRY2's physi…
AT1G04410	Lactate/malate dehydrogenase family protein:
AT1G04420	NAD(P)-linked oxidoreductase superfamily protein:
AT1G04425	other RNA:
AT1G04440	casein kinase like 13:
AT1G04480	Ribosomal protein L14p/L23e family protein:
AT1G04520	plasmodesmata-located protein 2:
AT1G04530	Tetratricopeptide repeat (TPR)-like superfamily protein:
AT1G04540	Calcium-dependent lipid-binding (CaLB domain) family protein:
AT1G04570	Major facilitator superfamily protein:
AT1G04590	unknown
AT1G04600	myosin XI A:member of Myosin-like proteins
AT1G04680	Pectin lyase-like superfamily protein:
AT1G04690	potassium channel beta subunit 1:
AT1G04710	peroxisomal 3-ketoacyl-CoA thiolase 4:EC2.3.1.16 thiolase.
AT1G04750	vesicle-associated membrane protein 721:vesicle-associated membrane protein 7B (At VAMP7B) mRNA,
AT1G04770	Tetratricopeptide repeat (TPR)-like superfamily protein:
AT1G04790	RING/U-box superfamily protein:
AT1G04830	Ypt/Rab-GAP domain of gyp1p superfamily protein:
AT1G04870	protein arginine methyltransferase 10:Encodes a type I protein arginine methyltransferase based on the At1g04870.2 gene model. PRMT10 can catalyze the asymmetric dimethylation of arginine 3 on histone 4 and can also methylate myelin basic protein in vitro. Mutants lacking PRMT10 flower late due to defects in the autonomous pathway and they have elevated levels of FLC transcripts.
AT1G04930	hydroxyproline-rich glycoprotein family protein:
AT1G04940	translocon at the inner envelope membrane of chloroplasts 20:Tic20 is believed to function as a component of the protein-conducting channel at the inner envelope membrane. Genes AT1G04940 and AT1G04945 were switched for the TAIR7 genome release to give consistency with MIPs annotation.
AT1G04945	HIT-type Zinc finger family protein:
AT1G04950	TATA BOX ASSOCIATED FACTOR II 59:Encodes one of two Arabidopsis proteins with significant similarity to the histone fold TBP-associated factor TAF6. Mutants are embryo lethal and transmission of the mutant allele through the male gametophyte is significantly reduced. This is due to reduced pollen tube growth of the mutant.
AT1G04960	Protein of unknown function (DUF1664):
AT1G04970	lipid-binding serum glycoprotein family protein:
AT1G04985	unknown
AT1G04990	Zinc finger C-x8-C-x5-C-x3-H type family protein:
AT1G05010	ethylene-forming enzyme:Encodes 1-aminocyclopropane-1-carboxylate oxidase
AT1G05070	Protein of unknown function (DUF1068):
AT1G05080	F-box/RNI-like/FBD-like domains-containing protein:
AT1G05090	dentin sialophosphoprotein-related:
AT1G05180	NAD(P)-binding Rossmann-fold superfamily protein:Encodes a subunit of the RUB1 activating enzyme that regulates the protein degradation activity of Skp1-Cullin-Fbox complexes, primarily, but not exclusively, affecting auxin responses. Acts alongside AS1 to exclude BP expression from leaves.
AT1G05190	Ribosomal protein L6 family:
AT1G05200	glutamate receptor 3.4:member of Putative ligand-gated ion channel subunit family
AT1G05270	TraB family protein:
AT1G05310	Pectin lyase-like superfamily protein:
AT1G05320	unknown
AT1G05340	unknown
AT1G05350	NAD(P)-binding Rossmann-fold superfamily protein:
AT1G05360	unknown
AT1G05370	Sec14p-like phosphatidylinositol transfer family protein:
AT1G05380	Acyl-CoA N-acyltransferase with RING/FYVE/PHD-type zinc finger protein:
AT1G05385	photosystem II 11 kDa protein-related:Encodes a Psb27 homolog involved in photosystem II biogenesis.
AT1G05390	pre-tRNA:
AT1G05400	unknown
AT1G05670	Pentatricopeptide repeat (PPR-like) superfamily protein:
AT1G05675	UDP-Glycosyltransferase superfamily protein
AT1G05690	BTB and TAZ domain protein 3:BTB and TAZ domain protein. Acts redunantly with BT1 and BT2 during female gametophyte development. Acts with BT2 during male gametophyte development.
AT1G05805	basic helix-loop-helix (bHLH) DNA-binding superfamily protein:
AT1G05840	Eukaryotic aspartyl protease family protein:
AT1G05850	Chitinase family protein:Encodes an endo chitinase-like protein AtCTL1. Essential for tolerance to heat, salt and drought stresses. Also involved in root hair development, cell expansion and response to cytokinin. Allelic to erh2. 11 alleles described in Hauser (1995). Mutant is defective in acquired thermotolerance, appears semidwarf throughout its life cycle and has extra lateral branches. Ther…
AT1G05860	unknown
AT1G05950	unknown
AT1G05960	ARM repeat superfamily protein:
AT1G06000	UDP-Glycosyltransferase superfamily protein:encodes a flavonol-7-O-rhamnosyltransferase involved in the formation of rhamnosylated flavonols
AT1G06002	Potential natural antisense gene, locus overlaps with AT1G06000
AT1G06010	unknown
AT1G06040	B-box zinc finger family protein:Encodes salt tolerance protein (STO) which confers salt tolerance to yeast cells. Fully complements calcineurin deficient yeast but does not encode a phosphoprotein phosphatase. Sequence has similarities to CONSTANS. STO co-localizes with COP1 and plays a role in light signaling.
AT1G06050	Protein of unknown function (DUF1336):
AT1G06060	LisH and RanBPM domains containing protein:
AT1G06070	Basic-leucine zipper (bZIP) transcription factor family protein:
AT1G06148	:Unknown gene
AT1G06149	conserved peptide upstream open reading frame 8:Upstream open reading frames (uORFs) are small open reading frames found in the 5' UTR of a mature mRNA, and can potentially mediate translational regulation of the largest, or major, ORF (mORF). CPuORF8 represents a conserved upstream opening reading frame relative to major ORF AT1G06150.1
AT1G06150	basic helix-loop-helix (bHLH) DNA-binding superfamily protein:
AT1G06180	myb domain protein 13:member of MYB3R- and R2R3- type MYB- encoding genes
AT1G06200	Peptidase S24/S26A/S26B/S26C family protein:
AT1G06210	ENTH/VHS/GAT family protein:
AT1G06220	Ribosomal protein S5/Elongation factor G/III/V family protein:Encodes a protein with similarity to splicing factor Snu114. Snu114 is thought to be involved in activation of the splicosome. Loss of GFA1 function results in reduced female fertility. Approximately 50% of ovules abort due to defects in the female gametophyte. In mutant gametophytes antipodal cells express egg cell markers suggesting …
AT1G06290	acyl-CoA oxidase 3:Encodes an acyl-CoA oxidase with specificity for medium chain fatty acids.
AT1G06310	acyl-CoA oxidase 6:Encodes a putative acyl-CoA oxidase. However, no transcripts have been detected for this gene and no altered phenotypes have been detected in plants mutant for this gene. This suggests that ACX6 does not significantly contribute to seedling beta-oxidation of fatty acids or indole-3-butyric acid in vivo.
AT1G06390	GSK3/SHAGGY-like protein kinase 1:encodes a GSK3/shaggy-like protein kinase. Gene expression is induced by NaCl and ABA but not KCl, suggesting that this gene may be involved in response to osmotic stress. This protein can interact with the BZR1 protein involved in brassinosteroid-mediated signaling in a Y2H assay and promotes BZR1 phosphorylation in protoplasts.
AT1G06400	Ras-related small GTP-binding family protein:small GTP-binding protein (ara-2)
AT1G06410	trehalose-phosphatase/synthase 7:Encodes an enzyme putatively involved in trehalose biosynthesis. Though the protein has both trehalose-6-phosphate synthase (TPS)-like and trehalose-6-phosphate phosphatase (TPP)-like domains, neither activity has been detected in enzymatic assays nor has the protein been able to complement yeast TPS or TPP mutants.
AT1G06420	unknown
AT1G06460	alpha-crystallin domain 32.1:ACD32.1 encodes an alpha-crystallin domain containing protein with homology to small heat shock proteins.
AT1G06470	Nucleotide/sugar transporter family protein:
AT1G06530	Tropomyosin-related:
AT1G06550	ATP-dependent caseinolytic (Clp) protease/crotonase family protein:
AT1G06560	NOL1/NOP2/sun family protein:
AT1G06570	phytoene desaturation 1:Mutation of the PDS1 locus disrupts the activity of p-hydroxyphenylpyruvate dioxygenase (HPPDase), the first committed step in the synthesis of both plastoquinone and tocopherols in plants.
AT1G06630	F-box/RNI-like superfamily protein:
AT1G06640	2-oxoglutarate (2OG) and Fe(II)-dependent oxygenase superfamily protein:encodes a protein whose sequence is similar to a 2-oxoglutarate-dependent dioxygenase
AT1G06645	2-oxoglutarate (2OG) and Fe(II)-dependent oxygenase superfamily protein:
AT1G06650	2-oxoglutarate (2OG) and Fe(II)-dependent oxygenase superfamily protein:encodes a protein whose sequence is similar to 2-oxoglutarate-dependent dioxygenase
AT1G06660	unknown
AT1G06670	nuclear DEIH-boxhelicase:nuclear DEIH-box helicase (NIH) encoding a putative RNA and/or DNA helicase homologous to a group of nucleic acid helicases from the DEAD/H family with nuclear DEIH-box helicase (NIH) distinct N- and C-terminal regions that differ from animal DEIH proteins
AT1G06680	photosystem II subunit P-1:Encodes a 23 kD extrinsic protein that is part of photosystem II and participates in the regulation of oxygen evolution.
AT1G06780	galacturonosyltransferase 6:Encodes a protein with putative galacturonosyltransferase activity.
AT1G06790	RNA polymerase Rpb7 N-terminal domain-containing protein:
AT1G06800	alpha/beta-Hydrolases superfamily protein:Encodes a lipase that hydrolyzes phosphatidylcholine, glycolipids as well as triacylglycerols.
AT1G06850	basic leucine-zipper 52:
AT1G06860	pre-tRNA:
AT1G06870	Peptidase S24/S26A/S26B/S26C family protein:
AT1G06880	pre-tRNA:
AT1G06890	nodulin MtN21 /EamA-like transporter family protein:
AT1G07000	exocyst subunit exo70 family protein B2:A member of EXO70 gene family, putative exocyst subunits, conserved in land plants. Arabidopsis thaliana contains 23 putative EXO70 genes, which can be classified into eight clusters on the phylogenetic tree.
AT1G07010	Calcineurin-like metallo-phosphoesterase superfamily protein:
AT1G07020	unknown
AT1G07030	Mitochondrial substrate carrier family protein:
AT1G07040	unknown
AT1G07050	CCT motif family protein:
AT1G07051	MIR847a; miRNA:Encodes a microRNA of unknown function. MicroRNAs are regulatory RNAs with a mature length of ~21-nucleotides that are processed from hairpin precursors by Dicer-like enzymes. MicroRNAs can negatively regulate gene expression by attenuating translation or by directing mRNA cleavage. Mature sequence: UCACUCCUCUUCUUCUUGAUG
AT1G07060	unknown
AT1G07070	Ribosomal protein L35Ae family protein:
AT1G07080	Thioredoxin superfamily protein:
AT1G07090	Protein of unknown function (DUF640):
AT1G07100	pre-tRNA:
AT1G07110	fructose-2,6-bisphosphatase:Encodes the bifunctional enzyme fructose-6-phosphate 2-kinase/fructose-2,6-bisphosphatase.
AT1G07119	other RNA:Potential natural antisense gene, locus overlaps with AT1G07120
AT1G07135	glycine-rich protein:
AT1G07175	unknown
AT1G07180	alternative NAD(P)H dehydrogenase 1:Internal NAD(P)H dehydrogenase in mitochondria. The predicted protein sequence has high homology with other designated NAD(P)H DHs from microorganisms; the capacity for matrix NAD(P)H oxidation via the rotenone-insensitive pathway is significantly reduced in the Atndi1 mutant plant line; the in vitro translation product of AtNDI1 is imported into isolated mitoc…
AT1G07210	Ribosomal protein S18:
AT1G07240	UDP-glucosyl transferase 71C5:
AT1G07250	UDP-glucosyl transferase 71C4:
AT1G07270	Cell division control, Cdc6:
AT1G07280	Tetratricopeptide repeat (TPR)-like superfamily protein:
AT1G07310	Calcium-dependent lipid-binding (CaLB domain) family protein:
AT1G07320	ribosomal protein L4:encodes a plastid ribosomal protein L4
AT1G07480	Transcription factor IIA, alpha/beta subunit:
AT1G07500	unknown
AT1G07510	FTSH protease 10:encodes an FtsH protease that is localized to the mitochondrion
AT1G07520	GRAS family transcription factor:
AT1G07570	Protein kinase superfamily protein:Protein kinase capable of phosphorylating tyrosine, serine, and threonine residues
AT1G07580	pre-tRNA:
AT1G07590	Tetratricopeptide repeat (TPR)-like superfamily protein:
AT1G07630	pol-like 5:Encodes a protein phosphatase 2C like gene, similar to POL. Involved in leaf development. Knockout mutants have abnormally shaped leaves.
AT1G07645	dessication-induced 1VOC superfamily protein:
AT1G07650	Leucine-rich repeat transmembrane protein kinase:
AT1G07660	Histone superfamily protein:
AT1G07670	endomembrane-type CA-ATPase 4:
AT1G07680	unknown
AT1G07700	Thioredoxin superfamily protein:
AT1G07725	exocyst subunit exo70 family protein H6:A member of EXO70 gene family, putative exocyst subunits, conserved in land plants. Arabidopsis thaliana contains 23 putative EXO70 genes, which can be classified into eight clusters on the phylogenetic tree.
AT1G07728	other RNA:Potential natural antisense gene, locus overlaps with AT1G07725
AT1G07770	ribosomal protein S15A:Encodes cytoplasmic ribosomal protein S15a.
AT1G07780	phosphoribosylanthranilate isomerase 1:Encodes phosphoribosylanthranilate isomerase which catalyzes the third step of the tryptophan biosynthetic pathway. Member of gene family.
AT1G07790	Histone superfamily protein:Encodes a histone 2B (H2B) protein.
AT1G07820	Histone superfamily protein:
AT1G07830	ribosomal protein L29 family protein:
AT1G07870	Protein kinase superfamily protein:
AT1G07885	unknown
AT1G07890	ascorbate peroxidase 1:Encodes a cytosolic ascorbate peroxidase APX1. Ascorbate peroxidases are enzymes that scavenge hydrogen peroxide in plant cells. Eight types of APX have been described for Arabidopsis: three cytosolic (APX1, APX2, APX6), two chloroplastic types (stromal sAPX, thylakoid tAPX), and three microsomal (APX3, APX4, APX5) isoforms. At least part of the induction of heat shock prot…
AT1G07910	RNAligase:Encodes a tRNA ligase that resembles the yeast Trl1 RNA ligase in structure and function but very different in sequence. Like Trl1, AtRNL consists of two domains Â— an N-terminal ligase component and a C-terminal 5'-kinase/2',3'-cyclic phosphodiesterase (CPD) componentÂ— that can function in tRNA splicing in vivo when expressed as separate polypeptides. Requires a 2'-PO4 end for tRNA sp…
AT1G07920	GTP binding Elongation factor Tu family protein:
AT1G07930	GTP binding Elongation factor Tu family protein:
AT1G07940	GTP binding Elongation factor Tu family protein:
AT1G08115	snRNA:U1A small nuclear RNA
AT1G08120	unknown
AT1G08125	S-adenosyl-L-methionine-dependent methyltransferases superfamily protein:
AT1G08130	DNA ligase 1:Encodes the Arabidopsis DNA ligase 1 that provides the major DNA ligase activity in cells and plays a key role in both DNA replication and excision repair pathways. Indispensable for cell viability. AtLIG1 expresses one major and two minor mRNA transcripts differing only in the length of the 5' untranslated leader sequences preceding a common ORF. Translation from the first in-frame …
AT1G08180	unknown
AT1G08200	UDP-D-apiose/UDP-D-xylose synthase 2:Encodes a putative UDP-D-apiose/UPD-D-xylose synthetase.
AT1G08230	Codes for a H+-driven, high affinity gamma-aminobutyric acid (GABA) transporter
AT1G08240	pre-tRNA:
AT1G08270	unknown
AT1G08280	Glycosyltransferase family 29 (sialyltransferase) family protein:
AT1G08350	Endomembrane protein 70 protein family:
AT1G08360	Ribosomal protein L1p/L10e family:
AT1G08380	photosystem I subunit O:Encodes subunit O of photosystem I.
AT1G08390	unknown
AT1G08450	calreticulin 3:Encodes one of three Arabidopsis calreticulins. In CRT-deficient mouse fibroblasts, this protein restores ER Ca2+ levels. Non-receptor component required for EFR-mediated immunity. Mutants show de-repressed anthocyanin accumulation in the presence of elf18, and EFR accumulation and signalling.
AT1G08460	histone deacetylase 8:
AT1G08470	strictosidine synthase-like 3:Although this enzyme is predicted to encode a strictosidine synthase (SS), it lacks a conserved catalytic glutamate residue found in active SS enzymes and it is not expected to have SS activity.
AT1G08480	unknown
AT1G08490	chloroplastic NIFS-like cysteine desulfurase:Chloroplastic NifS-like protein that can catalyze the conversion of cysteine into alanine and elemental sulfur (S(0)) and of selenocysteine into alanine and elemental Se (Se(0)). Overexpression enhances selenium tolerance and accumulation.
AT1G08500	early nodulin-like protein 18:
AT1G08510	fatty acyl-ACP thioesterases B:Encodes an acyl-acyl carrier protein thioesterase. Hydrolyzes primarily saturated acyl-ACPs with chain lengths that vary between 8 and 18 carbons. Involved in saturated fatty acid synthesis. Nuclear-encoded, plastid-targeted globular protein that is functional as dimer.
AT1G08540	RNApolymerase sigma subunit 2:Enodes a subunit of chloroplast RNA polymerase, confers the ability to recognize promoter sequences on the core enzyme. SIG1 is induced by red and blue light.
AT1G08560	syntaxin of plants 111:member of SYP11 syntaxin Gene Family
AT1G08570	atypical CYS HIS rich thioredoxin 4:Encodes a member of the thioredoxin family protein. Located in the chloroplast. Shows high activity towards the chloroplast 2-Cys peroxiredoxin A, and poor activity towards the chloroplast NADP-malate dehydrogenase.
AT1G08580	unknown
AT1G08590	Leucine-rich receptor-like protein kinase family protein:similar to CLV1-like leucine rich repeat transmembrane receptor-like protein kinase (Ipomoea nil) (U77888)
AT1G08592	Potential natural antisense gene, locus overlaps with AT1G08590
AT1G08610	Pentatricopeptide repeat (PPR) superfamily protein:
AT1G08620	Transcription factor jumonji (jmj) family protein / zinc finger (C5HC2 type) family protein:
AT1G08650	phosphoenolpyruvate carboxylase kinase 1:Encodes a phosphoenolpyruvate carboxylase kinase that is expressed at highest levels in leaves. Expression is induced by light.
AT1G08700	Presenilin-1:Encodes a protein similar to animal presenilin whose expression is increased in response to potassium (K+) deprivation.
AT1G08710	F-box family protein:
AT1G08720	Protein kinase superfamily protein:enhanced disease resistance 1 (EDR1) confers resistance to powdery mildew disease caused by the fungus Erysiphe cichoracearum
AT1G08830	copper/zinc superoxide dismutase 1:Encodes a cytosolic copper/zinc superoxide dismutase CSD1 that can detoxify superoxide radicals. Its expression is affected by miR398-directed mRNA cleavage. Regulated by biotic and abiotic stress.
AT1G08880	Histone superfamily protein:Encodes HTA5, a histone H2A protein. H2AX is a meiosis-specific isoform of histone H2A. Upon DSB formation, rapid accumulation of phosphorylated H2AX (&#947;-H2AX) occurs around the break site. H2AX foci accumulate in early G2. Immunolocalization studies in spread preparations of wild-type meiocytes at G2/early leptotene revealed the accumulation of numerous rather dif…
AT1G08890	Major facilitator superfamily protein:
AT1G08910	zinc ion binding;zinc ion binding:
AT1G08930	Major facilitator superfamily protein:encodes a putative sucrose transporter whose gene expression is induced by dehydration and cold.
AT1G08950	pre-tRNA:
AT1G08960	cation exchanger 11:member of Potassium-dependent sodium-calcium exchanger like-family
AT1G08970	nuclear factor Y, subunit C9:heme activated protein (HAP5c)
AT1G08980	amidase 1:Encodes an enzyme with similarity to bacterial acylamidohydrolases and exhibits indole-3-acetamide amidohydrolase activity in vitro. This enzyme may be involved in the in vivo biosynthesis of indole-acetic acid from indole-3-acetamide, a native metabolite of A. thaliana. It appears to exist as a monomer.
AT1G09060	Zinc finger, RING-type;Transcription factor jumonji/aspartyl beta-hydroxylase:
AT1G09070	soybean gene regulated by cold-2:SRC2 specifically binds the peptide PIEPPPHH, and moves from ER to a vacuole fraction where it gets internalized. Involved in Protein Storage Vacuole targeting.
AT1G09130	ATP-dependent caseinolytic (Clp) protease/crotonase family protein:
AT1G09140	SERINE-ARGININE PROTEIN 30:Encodes a serine-arginine rich RNA binding protein involved in regulation of splicing (including splicing of itself). Exists as 3 alternative spliced forms that are differentially expressed.
AT1G09150	pseudouridine synthase and archaeosine transglycosylase (PUA) domain-containing protein:
AT1G09195	unknown
AT1G09200	Histone superfamily protein:
AT1G09210	calreticulin 1b:Encodes one of three Arabidopsis calreticulins.
AT1G09230	RNA-binding (RRM/RBD/RNP motifs) family protein:
AT1G09330	unknown
AT1G09340	chloroplast RNA binding:Encodes CHLOROPLAST RNA BINDING (CRB), a putative RNA-binding protein. CRB is important for the proper functioning of the chloroplast. Mutations in CRB also affects the circadian system, altering the expression of both oscillator and output genes.
AT1G09390	GDSL-like Lipase/Acylhydrolase superfamily protein:
AT1G09520	unknown
AT1G09530	phytochrome interacting factor 3:Transcription factor interacting with photoreceptors phyA and phyB. Forms a ternary complex in vitro with G-box element of the promoters of LHY, CCA1. Acts as a negative regulator of phyB signalling. It degrades rapidly after irradiation of dark grown seedlings in a process controlled by phytochromes. Does not play a significant role in controlling light input and…
AT1G09550	Pectinacetylesterase family protein:
AT1G09560	germin-like protein 5:germin-like protein (GLP5)
AT1G09580	emp24/gp25L/p24 family/GOLD family protein:
AT1G09620	ATP binding;leucine-tRNA ligases;aminoacyl-tRNA ligases;nucleotide binding;ATP binding;aminoacyl-tRNA ligases:
AT1G09640	Translation elongation factor EF1B, gamma chain:
AT1G09645	unknown
AT1G09660	RNA-binding KH domain-containing protein:
AT1G09680	Pentatricopeptide repeat (PPR) superfamily protein:
AT1G09690	Translation protein SH3-like family protein:
AT1G09730	Cysteine proteinases superfamily protein:
AT1G09740	Adenine nucleotide alpha hydrolases-like superfamily protein:
AT1G09750	Eukaryotic aspartyl protease family protein:
AT1G09760	U2 small nuclear ribonucleoprotein A:
AT1G09770	cell division cycle 5:Member of MYB3R- and R2R3- type MYB- encoding genes. Essential for plant innate immunity. Interacts with MOS4 and PRL1.
AT1G09800	Pseudouridine synthase family protein:
AT1G09810	evolutionarily conserved C-terminal region 11:
AT1G09815	polymerase delta 4:
AT1G09830	Glycinamide ribonucleotide (GAR) synthetase:glycinamide ribonucleotide synthetase (GAR synthetase) that catalyzes the conversion of phosphoribosyl amine to phosphoribosyl glycineamide
AT1G09850	xylem bark cysteine peptidase 3:Arabidopsis thaliana papain-like cysteine peptidase
AT1G09860	purine permease 16:Member of a family of proteins related to PUP1, a purine transporter. May be involved in the transport of purine and purine derivatives such as cytokinins, across the plasma membrane.
AT1G09870	histidine acid phosphatase family protein:
AT1G09920	TRAF-type zinc finger-related:
AT1G09940	Glutamyl-tRNA reductase family protein:Encodes glutamyl-tRNA reductase. Involved in heme biosynthesis in non-photosynthetic tissues and induced by oxidative stress in photosynthetic tissues to supply heme for defensive hemoproteins
AT1G09970	Leucine-rich receptor-like protein kinase family protein:RLK7 belongs to a leucine-rich repeat class of receptor-likekinase (LRR-RLKs). It is involved in the control of germination speed and the tolerance to oxidant stress.
AT1G09980	Putative serine esterase family protein:
AT1G09995	DNA repair DEAD helicase RAD3/XP-D subfamily protein:
AT1G10000	Ribonuclease H-like superfamily protein:
AT1G10020	Protein of unknown function (DUF1005):
AT1G10030	homolog of yeast ergosterol28:
AT1G10040	alpha/beta-Hydrolases superfamily protein:
AT1G10050	glycosyl hydrolase family 10 protein / carbohydrate-binding domain-containing protein:Encodes a putative glycosyl hydrolase family 10 protein (xylanase).
AT1G10070	branched-chain amino acid transaminase 2:Encodes a chloroplast branched-chain amino acid aminotransferase. Complements the yeast leu/iso-leu/val auxotrophy mutant.
AT1G10090	Early-responsive to dehydration stress protein (ERD4):
AT1G10100	unknown
AT1G10110	F-box family protein:
AT1G10140	Uncharacterised conserved protein UCP031279:
AT1G10150	Carbohydrate-binding protein:
AT1G10155	phloem protein 2-A10:
AT1G10240	FAR1-related sequence 11:
AT1G10270	glutamine-rich protein 23:
AT1G10280	Core-2/I-branching beta-1,6-N-acetylglucosaminyltransferase family protein:
AT1G10360	glutathione S-transferase TAU 18:Encodes glutathione transferase belonging to the tau class of GSTs. Naming convention according to Wagner et al. (2002).
AT1G10370	Glutathione S-transferase family protein:
AT1G10410	Protein of unknown function (DUF1336):
AT1G10430	protein phosphatase 2A-2:Encodes one of the isoforms of the catalytic subunit of protein phosphatase 2A: AT1G59830/PP2A-1, AT1G10430/PP2A-2, At2g42500/PP2A-3, At3g58500/PP2A-4 [Plant Molecular Biology (1993) 21:475-485 and (1994) 26:523-528; Note that in more recent publications, there is mixed use of gene names for PP2A-3 and PP2A-4 - some refer to At2g42500 as PP2A-3 and some as PP2A-4].
AT1G10440	pre-tRNA:
AT1G10450	SIN3-like 6:Encodes SIN3-like 6, a homolog of the transcriptional repressor SIN3 (AT1G24190).
AT1G10460	germin-like protein 7:germin-like protein (GLP7)
AT1G10470	response regulator 4:Encodes a two-component response regulator. Acts redundantly with ARR3 in the control of circadian period in a cytokinin-independent manner.
AT1G10500	chloroplast-localized ISCA-like protein:Involved in chloroplast Fe-S cluster assembly. Located in the chloroplast stroma. Expressed preferentially in green tissues.
AT1G10510	RNI-like superfamily protein:
AT1G10550	xyloglucan:xyloglucosyl transferase 33:Encodes a membrane-localized protein that is predicted to function during cell wall modification.Overexpression of XTH33 results in abnormal cell morphology. It's expression is under epigenetic control by ATX1.
AT1G10560	plant U-box 18:Encodes a protein containing a UND, a U-box, and an ARM domain. This protein has E3 ubiquitin ligase activity based on in vitro assays.
AT1G10585	basic helix-loop-helix (bHLH) DNA-binding superfamily protein:
AT1G10590	Nucleic acid-binding, OB-fold-like protein:
AT1G10600	associated molecule with the SH3 domain of STAM 2:
AT1G10660	unknown
AT1G10670	ATP-citrate lyase A-1:One of the three genes encoding subunit A of the trimeric protein ATP Citrate Lyase. Antisense ACLA-1 plants cause a reduction in cytosolic acetyl-CoA metabolism and have upregulation of stress-related genes and down-regulation of primary metabolism and growth genes, suggesting the mutation restricts normal growth and developmental processes and puts the plant into a state o…
AT1G10690	unknown
AT1G10700	phosphoribosyl pyrophosphate (PRPP) synthase 3:Encodes a P-independent phosphoribosyl pyrophosphate (PRPP) synthase.
AT1G10710	poor homologous synapsis 1:Computational predictions suggested the presence of a small cysteine-rich protein downstream of this gene model (Silverstein 2007), but subsequent analysis revealed that this region contains a tenth exon for the At1g10710 gene which is depicted in the At1g10710.1 gene model.
AT1G10740	alpha/beta-Hydrolases superfamily protein:
AT1G10750	Protein of Unknown Function (DUF239):
AT1G10760	Pyruvate phosphate dikinase, PEP/pyruvate binding domain:Encodes an &#945;-glucan, water dikinase required for starch degradation. Involved in cold-induced freezing tolerance. Mutations that eliminate the GWD protein or affect the dikinase domain of the enzyme dramatically reduce both the amount of phosphate in the amylopectin and the rate of starch degradation. Mature leaves of these mutants acc…
AT1G10910	Pentatricopeptide repeat (PPR) superfamily protein:
AT1G10940	Protein kinase superfamily protein:Encodes a plant protein kinase similar to the calcium/calmodulin-dependent protein kinase subfamily and the SNF1 kinase subfamily (SnRK2) whose activity is activated by ionic (salt) and non-ionic (mannitol) osmotic stress. Kinase activity of its homolog in tobacco is induced by hyperosmotic condition within 1 minute.
AT1G10950	transmembrane nine 1:Encodes an Arabidopsis Transmembrane nine (TMN) protein. Transmembrane nine (TM9) proteins are localized in the secretory pathway of eukaryotic cells and are involved in cell adhesion and phagocytosis.
AT1G10960	ferredoxin 1:
AT1G11000	Seven transmembrane MLO family protein:A member of a large family of seven-transmembrane domain proteins specific to plants, homologs of the barley mildew resistance locus o (MLO) protein. The Arabidopsis genome contains 15 genes encoding MLO proteins, with localization in plasma membrane. Phylogenetic analysis revealed four clades of closely-related AtMLO genes. ATMLO4 belongs to the clade I, wi…
AT1G11010	pre-tRNA:
AT1G11020	RING/FYVE/PHD zinc finger superfamily protein:
AT1G11040	HSP40/DnaJ peptide-binding protein:
AT1G11050	Protein kinase superfamily protein:
AT1G11090	alpha/beta-Hydrolases superfamily protein:
AT1G11125	unkown
AT1G11175	other RNA:
AT1G11180	Secretory carrier membrane protein (SCAMP) family protein:
AT1G11240	unknown
AT1G11250	syntaxin of plants 125:member of SYP12 Gene Family
AT1G11260	sugar transporter 1:Encodes a H+/hexose cotransporter.
AT1G11280	S-locus lectin protein kinase family protein:
AT1G11300	protein serine/threonine kinases;protein kinases;ATP binding;sugar binding;kinases;carbohydrate binding:
AT1G11310	Seven transmembrane MLO family protein:A member of a large family of seven-transmembrane domain proteins specific to plants, homologs of the barley mildew resistance locus o (MLO) protein. The Arabidopsis genome contains 15 genes encoding MLO proteins, with localization in plasma membrane. Phylogenetic analysis revealed four clades of closely-related AtMLO genes. ATMLO2 belongs to the clade IV, w…
AT1G11320	unknown
AT1G11330	S-locus lectin protein kinase family protein:
AT1G11350	S-domain-1 13:
AT1G11360	Adenine nucleotide alpha hydrolases-like superfamily protein:
AT1G11380	PLAC8 family protein:
AT1G11390	Protein kinase superfamily protein:
AT1G11400	partner of Y14-MAGO:The PYM gene encodes a protein capable of interacting with MAGO, and Y14, whose orthologs form part of the exon junction complex in animal cells. In vitro binding assays indicate that PYM can bind to MAGO and Y14 either individually, or when they are together. But, MAGO-Y14-PYM ternary complexes are difficult to detect in vivo in Arabidopsis based on pull-down experiments. How…
AT1G11430	plastid developmental protein DAG, putative:
AT1G11440	unknown
AT1G11530	C-terminal cysteine residue is changed to a serine 1:Encodes a monocysteinic thioredoxin, thioredoxin in which the second cysteine of the redox site is replaced by a serine, with low disulfide reductase but efficient disulfide isomerase activity.
AT1G11550	pre-tRNA:
AT1G11560	Oligosaccharyltransferase complex/magnesium transporter family protein:
AT1G11630	Tetratricopeptide repeat (TPR)-like superfamily protein:
AT1G11640	pre-tRNA:
AT1G11650	RNA-binding (RRM/RBD/RNP motifs) family protein:
AT1G11680	CYTOCHROME P450 51G1:putative obtusifoliol 14-alpha demethylase involved in sterol biosynthesis.
AT1G11710	Pentatricopeptide repeat (PPR) superfamily protein:
AT1G11720	starch synthase 3:Encodes a starch synthase that in addition to its role in starch biosynthesis also has a negative regulatory function in the biosynthesis of transient starch. The protein apparently contains a starch-binding domain (SBD).
AT1G11740	ankyrin repeat family protein:
AT1G11750	CLP protease proteolytic subunit 6:One of several nuclear-encoded ClpPs (caseinolytic protease). Contains a highly conserved catalytic triad of Ser-type proteases (Ser-His-Asp). The name reflects nomenclature described in Adam et. al (2001).
AT1G11785	unknown
AT1G11790	arogenate dehydratase 1:Encodes a plastid-localized arogenate dehydratase involved in phenylalanine biosynthesis. Not less than six genes encoding ADT were identi&#64257;ed in the Arabidopsis genome: ADT1 [At1g11790]; ADT2 [At3g07630]; ADT3 [At2g27820]; ADT4 [At3g44720]; ADT5 [At5g22630]; and ADT6 [At1g08250].
AT1G11800	endonuclease/exonuclease/phosphatase family protein:
AT1G11840	glyoxalase I homolog:Encodes a glyoxalase I homolog ATGLX1.
AT1G11880	transferases, transferring hexosyl groups:
AT1G11890	Synaptobrevin family protein:member of SEC22 Gene Family
AT1G11900	Tetratricopeptide repeat (TPR)-like superfamily protein:
AT1G11905	B-cell receptor-associated protein 31-like :
AT1G11910	aspartic proteinase A1:Encodes an aspartic proteinase that forms a heterodimer and is stable over a broad pH range (ph 3-8).
AT1G11915	unknown
AT1G11960	ERD (early-responsive to dehydration stress) family protein:
AT1G11970	Ubiquitin-like superfamily protein:
AT1G12010	2-oxoglutarate (2OG) and Fe(II)-dependent oxygenase superfamily protein:Encodes a protein that appears to have 1-amino-cyclopropane-1-carboxylic acid oxidase activity based on mutant analyses.
AT1G12013	SNOR111; snoRNA:Encodes a H/ACA-box snoRNA (snoR111). Gb: AJ505682
AT1G12015	snoRNA:
AT1G12120	Plant protein of unknown function (DUF863):
AT1G12140	flavin-monooxygenase glucosinolate S-oxygenase 5:belongs to the flavin-monooxygenase (FMO) family, encodes a glucosinolate S-oxygenase that catalyzes the conversion of methylthioalkyl glucosinolates to methylsulfinylalkyl glucosinolates
AT1G12240	Glycosyl hydrolases family 32 protein:
AT1G12244	Polynucleotidyl transferase, ribonuclease H-like superfamily protein:
AT1G12250	Pentapeptide repeat-containing protein:
AT1G12290	Disease resistance protein (CC-NBS-LRR class) family:
AT1G12294	MIR472a; miRNA:Encodes a microRNA that targets several CC-NBS-LRR family members. MicroRNAs are regulatory RNAs with a mature length of ~21-nucleotides that are processed from hairpin precursors by Dicer-like enzymes. MicroRNAs can negatively regulate gene expression by attenuating translation or by directing mRNA cleavage. Mature sequence: UUUUUCCUACUCCGCCCAUAC
AT1G12310	Calcium-binding EF-hand family protein:
AT1G12320	Protein of unknown function (DUF1442):
AT1G12370	photolyase 1:encodes an amino acid sequence with significant homology to the recently characterized type II photolyases. The uvr2-1 mutant is unable to remove CPDs in vivo, and plant extracts lack detectable photolyase activity , is sensitive to UV-B and is an allele
AT1G12380	unknown
AT1G12390	Cornichon family protein:
AT1G12420	ACT domain repeat 8:
AT1G12440	A20/AN1-like zinc finger family protein:
AT1G12450	SNARE associated Golgi protein family:
AT1G12470	zinc ion binding:
AT1G12500	Nucleotide-sugar transporter family protein:
AT1G12510	pre-tRNA:
AT1G12580	phosphoenolpyruvate carboxylase-related kinase 1:
AT1G12710	phloem protein 2-A12:This gene is predicted to encode a protein with a PP2 domain. This domain in present in lectins found in squash and cucumber, suggesting that this protein could potentially have carbohydrate binding capabilities.
AT1G12750	RHOMBOID-like protein 6:
AT1G12760	Zinc finger, C3HC4 type (RING finger) family protein:
AT1G12780	UDP-D-glucose/UDP-D-galactose 4-epimerase 1:Encodes a UDP-glucose epimerase that catalyzes the interconversion of the sugar nucleotides UDP-glucose UDP-galactose via a UDP-4-keto-hexose intermediate. Responsive to stress.
AT1G12790	unknown
AT1G12800	Nucleic acid-binding, OB-fold-like protein:
AT1G12805	nucleotide binding:
AT1G12820	auxin signaling F-box 3:Auxin receptor involved in primary and lateral root growth inhibition in response to nitrate. Target of miR393. Induced by nitrate in primary roots.
AT1G12830	unknown
AT1G12840	vacuolar ATP synthase subunit C (VATC) / V-ATPase C subunit / vacuolar proton pump C subunit (DET3):Encodes subunit C of the vacuolar H(+)-ATPase (V-ATPase). Bound and phosphorylated by AtWNK8.
AT1G12900	glyceraldehyde 3-phosphate dehydrogenase A subunit 2:
AT1G12920	eukaryotic release factor 1-2:Encodes a eukaryotic release factor one homolog.
AT1G12930	ARM repeat superfamily protein:
AT1G12950	root hair specific 2:
AT1G12990	beta-1,4-N-acetylglucosaminyltransferase family protein:
AT1G13020	eukaryotic initiation factor 4B2:Encodes eIF4B2, eukaryotic initiation factor 4B2.
AT1G13080	cytochrome P450, family 71, subfamily B, polypeptide 2:cytochrome P450 monooxygenase
AT1G13090	cytochrome P450, family 71, subfamily B, polypeptide 28:putative cytochrome P450
AT1G13110	cytochrome P450, family 71 subfamily B, polypeptide 7:member of CYP71B
AT1G13120	embryo defective 1745:
AT1G13220	nuclear matrix constituent protein-related:Encodes a nuclear coiled-coil protein related to the carrot peripheral nuclear protein NMCP1 that is involved in the determination of plant nuclear structure.
AT1G13245	ROTUNDIFOLIA like 17:
AT1G13250	galacturonosyltransferase-like 3:Encodes a protein with putative galacturonosyltransferase activity.
AT1G13260	related to ABI3/VP1 1:Encodes an AP2/B3 domain transcription factor which is upregulated in response to low temperature. It contains a B3 DNA binding domain. It has circadian regulation and may function as a negative growth regulator.
AT1G13270	methionine aminopeptidase 1B:Encodes a methionine aminopeptidase formerly called MAP1B, renamed to MAP1C.
AT1G13280	allene oxide cyclase 4:Encodes allene oxide cyclase. One of four genes in Arabidopsis that encode this enzyme, which catalyzes an essential step in jasmonic acid biosynthesis. Gene expression is reduced during senescence, a process that involves jasmonic acid signalling pathway.
AT1G13320	protein phosphatase 2A subunit A3:one of three genes encoding the 65 kDa regulatory subunit of protein phosphatase 2A (PP2A)
AT1G13330	Arabidopsis Hop2 homolog:Encodes the Arabidopsis Hop2 homologue. In other species, Hop2 is proposed to be involved in inter-homolog bias in double strand break repair.
AT1G13350	Protein kinase superfamily protein:
AT1G13360	unknown
AT1G13380	Protein of unknown function (DUF1218):
AT1G13440	glyceraldehyde-3-phosphate dehydrogenase C2:
AT1G13448	other RNA:Potential natural antisense gene, locus overlaps with AT1G13450
AT1G13450	Homeodomain-like superfamily protein:
AT1G13460	Protein phosphatase 2A regulatory B subunit family protein:Encodes protein phosphatase 2A (PP2A) B'theta subunit. Targeted to peroxisomes.
AT1G13470	Protein of unknown function (DUF1262):
AT1G13640	Phosphatidylinositol 3- and 4-kinase family protein:
AT1G13690	ATPase E1:AtE1 - stimulates the ATPase activity of DnaK/DnaJ
AT1G13700	6-phosphogluconolactonase 1:
AT1G13730	Nuclear transport factor 2 (NTF2) family protein with RNA binding (RRM-RBD-RNP motifs) domain:
AT1G13740	ABI five binding protein 2:Encodes a member of a small plant-specific gene family whose members interact with ABI5 and appear to be involved in mediating stress responses. AFP2 mutants affect a number of ABA mediated processes such as germination and response to osmotic and sugar stress. AFP2 nuclear localization is stress dependent.
AT1G13810	Restriction endonuclease, type II-like superfamily protein:
AT1G13820	alpha/beta-Hydrolases superfamily protein:
AT1G13860	QUASIMODO2 LIKE 1:Encodes QUASIMODO2 LIKE1 (QUL1), a paralog of QUASIMODO2 (QUA2). AT1G78240 (QUA2), AT1G13860 (QUL1) and AT2G03480 (QUL2) form a clade with a possible role in plant vasculature development.
AT1G13870	calmodulin binding;purine nucleotide binding:Encodes a homolog of the yeast TOT4/KTI12 protein. Yeast TOT4/KTI12 associates with Elongator, a multisubunit complex that binds the RNA polymerase II transcription elongation complex. Ds insertion mutant has enlarged shoot apical region, 4 to 6 long slender leaves followed by spike-like structures, short roots.
AT1G13880	ELM2 domain-containing protein:
AT1G13930	:Involved in response to salt stress. Knockout mutants are hypersensitive to salt stress.
AT1G13950	eukaryotic elongation factor 5A-1:Encodes eukaryotic translation initiation factor 5A (EIF-5A).In mammalian cells it functions as a shuttle protein that translocates mRNA from the nucleus to cytoplasmic ribosomes. Overexpression results in an increase in both primary and secondary xylem formation. In RNAi suppressed lines, xylem formation is reduced.
AT1G13960	WRKY DNA-binding protein 4:Encodes WRKY DNA-binding protein 4 (WRKY4).
AT1G13980	sec7 domain-containing protein:Encodes a GDP/GTP exchange factor for small G-proteins of the ADP ribosylation factor (RAF) class, and as regulator of intracellular trafficking. Homologous to Sec7p and YEC2 from yeast. Involved in the specification of apical-basal pattern formation. Essential for cell division, expansion and adhesion. It appears that heteotypic binding between the DCB and C-termin…
AT1G13990	unknown
AT1G14000	VH1-interacting kinase:Encodes a protein with similarity to members of the C1 subgroup of MAP kinase kinase kinases. Interacts physically with the receptor kinase BRL2/VH1 and appears to be involved in auxin and brassinosteriod signaling.
AT1G14010	emp24/gp25L/p24 family/GOLD family protein:
AT1G14020	O-fucosyltransferase family protein:
AT1G14140	Mitochondrial substrate carrier family protein:
AT1G14150	PsbQ-like 2:Encodes a subunit of the NAD(P)H dehydrogenase complex located in the chloroplast thylakoid lumen.
AT1G14200	RING/U-box superfamily protein:
AT1G14205	Ribosomal L18p/L5e family protein:
AT1G14270	CAAX amino terminal protease family protein:
AT1G14280	phytochrome kinase substrate 2:Encodes phytochrome kinase substrate 2. PKS proteins are critical for hypocotyl phototropism. Forms a complex with Phot1, Phot2 and NPH3.
AT1G14290	sphingoid base hydroxylase 2:Encodes one of the two redundant sphingoid base hydroxylases (SBH). Involved in sphingolipid trihydroxy long-chain base (4-hydroxysphinganine) biosynthesis. Double mutants of SBHs were dwarfed and not able to progress from vegetative to reproductive growth.
AT1G14300	ARM repeat superfamily protein:
AT1G14310	Haloacid dehalogenase-like hydrolase (HAD) superfamily protein:
AT1G14315	F-box and associated interaction domains-containing protein:
AT1G14320	Ribosomal protein L16p/L10e family protein:Encodes a ribosomal protein L10 and may be involved in translation regulation. Semi-dominant mutations in SAC552 can suppress defects in acaulis5, which encodes a thermospermine synthase, by enhancing translation of acl5 and itself.
AT1G14340	RNA-binding (RRM/RBD/RNP motifs) family protein:
AT1G14370	protein kinase 2A:Encodes protein kinase APK2a.
AT1G14380	IQ-domain 28:
AT1G14400	ubiquitin carrier protein 1:ubiquitin carrier protein
AT1G14430	glyoxal oxidase-related protein:
AT1G14450	NADH dehydrogenase (ubiquinone)s:
AT1G14590	Nucleotide-diphospho-sugar transferase family protein:
AT1G14650	SWAP (Suppressor-of-White-APricot)/surp domain-containing protein / ubiquitin family protein:
AT1G14680	unknown
AT1G14685	basic pentacysteine 2:Arabidopsis GBP Basic Penta Cysteine 1
AT1G14710	hydroxyproline-rich glycoprotein family protein:
AT1G14740	Protein of unknown function (DUF1423):
AT1G14750	Cyclin family protein:Encodes a meiotic cyclin-like protein, distinct from all other known Arabidopsis cyclins. It is not required for meiotic DSB formation but is necessary for meiotic DSB repair via the homologous chromosome.
AT1G14770	RING/FYVE/PHD zinc finger superfamily protein:
AT1G14820	Sec14p-like phosphatidylinositol transfer family protein:
AT1G14840	microtubule-associated proteins 70-4:Encodes a microtubule associated protein (MAP70-4). Expressed in all tissues.
AT1G14900	high mobility group A:Encodes a protein belonging to the subgroup of HMGA (high mobility group A) proteins that interact with A/T-rich stretches of DNA.
AT1G14910	ENTH/ANTH/VHS superfamily protein:
AT1G14920	GRAS family transcription factor family protein:Similar to a putative transcription factor and transcriptional coactivators. Repressor of GA responses and involved in gibberellic acid mediated signaling. Member of the DELLA proteins that restrain the cell proliferation and expansion that drives plant growth. The protein undergoes degradation in response to GA via the 26S proteasome. GAI may be in…
AT1G14980	chaperonin 10:Encodes mitochondrial-localized chaperonin 10 that complements the E.coli groES mutant. Its mRNA is upregulated in response to heat shock treatment and is expressed uniformly in various organs.
AT1G15002	Potential natural antisense gene, locus overlaps with AT1G15000
AT1G15010	unknown
AT1G15015	F-box family protein:
AT1G15020	quiescin-sulfhydryl oxidase 1:Encodes a protein disulfide isomerase-like (PDIL) protein, a member of a multigene family within the thioredoxin (TRX) superfamily. This protein also belongs to the quiescin-sulfhydryl oxidase (QSOX) family, which possess an Erv1-like domain at the COOH terminus in addition to a TRX domain.
AT1G15060	Uncharacterised conserved protein UCP031088, alpha/beta hydrolase:
AT1G15080	lipid phosphate phosphatase 2:Encodes phosphatidic acid phosphatase. Involved in ABA signaling. Functions as a negative regulator upstream of ABI4. Expressed during germination and seed development. Expressed overall in young seedlings, in roots, hypocotyls, and vascular cells of cotyledons and leaves of 10 day-old seedlings, in flower filaments and stem elongation zones. Not expressed in anthers…
AT1G15090	pre-tRNA:
AT1G15120	Ubiquinol-cytochrome C reductase hinge protein:
AT1G15125	S-adenosyl-L-methionine-dependent methyltransferases superfamily protein:
AT1G15165	RING/FYVE/PHD zinc finger superfamily protein:
AT1G15170	MATE efflux family protein:
AT1G15175	other RNA:Potential natural antisense gene, locus overlaps with AT1G15170
AT1G15180	MATE efflux family protein:
AT1G15230	unknown
AT1G15240	Phox-associated domain;Phox-like;Sorting nexin, C-terminal:
AT1G15250	Zinc-binding ribosomal protein family protein:
AT1G15260	unknown
AT1G15270	Translation machinery associated TMA7:
AT1G15280	CASC3/Barentsz eIF4AIII binding:
AT1G15290	Tetratricopeptide repeat (TPR)-like superfamily protein:
AT1G15340	methyl-CPG-binding domain 10:Protein containing methyl-CpG-binding domain.Has sequence similarity to human MBD proteins.
AT1G15370	SNARE-like superfamily protein:
AT1G15440	periodic tryptophan protein 2:
AT1G15450	pre-tRNA:
AT1G15490	alpha/beta-Hydrolases superfamily protein:
AT1G15580	indole-3-acetic acid inducible 5:auxin induced protein
AT1G15590	unknown
AT1G15650	pre-tRNA:
AT1G15660	centromere protein C:Encodes a homologue of the human centromeric protein C (CENP-C). CENP-C co-localizes with the 180 bp centromeric regions of chromosomes throughout the cell cycle, but does not completely cover the 180 bp regions.
AT1G15670	Galactose oxidase/kelch repeat superfamily protein:
AT1G15690	Inorganic H pyrophosphatase family protein:Encodes a H(+)-translocating (pyrophosphate-energized) inorganic pyrophosphatase (H(+)-PPase; EC 3.6.1.1) located in the vacuolar membrane. Expression is found in all tissues examined, including meristems and floral organ primordium. Expression is particularly enhanced in pollen, and is repressed by light. Over expression and loss of function phenotypes …
AT1G15700	ATPase, F1 complex, gamma subunit protein:One of two genes that encode the gamma subunit of Arabidopsis chloroplast ATP synthase. It is thought to be involved in the regulation of the ATP synthase activity.
AT1G15720	TRF-like 5:Arabidopsis thaliana myb family transcription factor (At1g15720)
AT1G15730	Cobalamin biosynthesis CobW-like protein:
AT1G15740	Leucine-rich repeat family protein:
AT1G15750	Transducin family protein / WD-40 repeat family protein:Encodes a protein with several WD40 repeats at the C-terminus and predicted protein-protein interaction domains at the N-terminus. Together with the TOPLESS-RELATED PROTEINS (TPRs), it is thought to be involved in transcriptional repression of root-promoting genes in the top help of the embryo during the transition stage of embryogenesis. Th…
AT1G15800	unknown
AT1G15810	S15/NS1, RNA-binding protein:
AT1G15820	light harvesting complex photosystem II subunit 6:Lhcb6 protein (Lhcb6), light harvesting complex of photosystem II.
AT1G15830	unknown
AT1G15840	unknown
AT1G15880	golgi snare 11:Golgi SNARE 11 protein (GOS11)
AT1G15885	unknown
AT1G15890	Disease resistance protein (CC-NBS-LRR class) family:
AT1G15930	Ribosomal protein L7Ae/L30e/S12e/Gadd45 family protein:
AT1G15970	DNA glycosylase superfamily protein:
AT1G15980	NDH-dependent cyclic electron flow 1:encodes a novel subunit of the chloroplast NAD(P)H dehydrogenase complex, involved in cyclic electron flow around photosystem I to produce ATP.
AT1G16010	magnesium transporter 2:Transmembrane magnesium transporter. One of nine family members.
AT1G16020	Protein of unknown function (DUF1712):
AT1G16070	tubby like protein 8:Member of TLP family
AT1G16080	unknown
AT1G16100	pre-tRNA:
AT1G16110	wall associated kinase-like 6:WAK-like kinase
AT1G16130	wall associated kinase-like 2:wall-associated kinase like
AT1G16150	wall associated kinase-like 4:Encodes a cell-wall associated kinase like protein of the receptor-like kinase (RLK) superfamily. Likely involved in Arabidopsis root mineral responses to Zn2+, Cu2+, K+, Na+ and Ni+.
AT1G16170	unknown
AT1G16180	Serinc-domain containing serine and sphingolipid biosynthesis protein:
AT1G16190	Rad23 UV excision repair protein family:Encodes a member of the RADIATION SENSITIVE23 (RAD23) family: AT1G16190(RAD23A), AT1G79650(RAD23B), AT3G02540(RAD23C), AT5G38470(RAD23D). RAD23 proteins play an essential role in the cell cycle, morphology, and fertility of plants through their delivery of UPS (ubiquitin/26S proteasome system) substrates to the 26S proteasome.
AT1G16210	unknown
AT1G16220	Protein phosphatase 2C family protein:
AT1G16240	syntaxin of plants 51:Encodes one of 24 Arabidopsis syntaxins. Its mRNA has been shown to be expressed.
AT1G16250	Galactose oxidase/kelch repeat superfamily protein:
AT1G16260	Wall-associated kinase family protein:
AT1G16270	Protein kinase superfamily protein with octicosapeptide/Phox/Bem1p domain:
AT1G16450	pre-tRNA:
AT1G16460	rhodanese homologue 2:encodes a cytoplasmic thiosulfate:cyanide sulfurtransferase, activity of which increased the rhodanese activity of transgenic yeast. Can also act as a mercaptopyruvate sulfurtransferase.
AT1G16470	proteasome subunit PAB1:Encodes 20S proteasome subunit PAB1 (PAB1).
AT1G16480	Tetratricopeptide repeat (TPR)-like superfamily protein:
AT1G16489	other RNA:Potential natural antisense gene, locus overlaps with AT1G16490
AT1G16630	unknown
AT1G16635	other RNA
AT1G16640	AP2/B3-like transcriptional factor family protein:
AT1G16650	S-adenosyl-L-methionine-dependent methyltransferases superfamily protein:
AT1G16730	unknown protein 6:
AT1G16740	Ribosomal protein L20:
AT1G16750	Protein of unknown function, DUF547:
AT1G16800	P-loop containing nucleoside triphosphate hydrolases superfamily protein:
AT1G16810	unknown
AT1G16820	vacuolar ATP synthase catalytic subunit-related / V-ATPase-related / vacuolar proton pump-related:
AT1G16825	Reticulon family protein
AT1G16870	mitochondrial 28S ribosomal protein S29-related:
AT1G16880	uridylyltransferase-related:
AT1G16890	ubiquitin-conjugating enzyme 36:UBC36/UBC13B encodes a protein that may play a role in DNA damage responses and error-free post-replicative DNA repair. It can bind to the MMZ/UEV1 proteins in vitro.
AT1G16970	KU70 homolog:Ku80 and ku70 form the heterodimer complex Ku, required for proper maintenance of the telomeric C strand. Ku regulates the extension of the telomeric G strand. Interacts with WEX, and this interaction stimulates the WEX exonuclease activity.
AT1G17080	Ribosomal protein L18ae family:
AT1G17090	unknown
AT1G17100	SOUL heme-binding family protein:
AT1G17110	ubiquitin-specific protease 15:Encodes a ubiquitin-specific protease, and its activity has been confirmed in an in vitro assay. ubp15 mutants have defects in cell proliferation, and the associated processes of leaf, root, stem, flower, and silique development. UBP15 can be found in the nucleus and cytoplasm in transient assays. Though UBP15 is expressed in many tissues, UBP15 transcript levels ar…
AT1G17120	cationic amino acid transporter 8:Encodes a member of the cationic amino acid transporter (CAT) subfamily of amino acid polyamine choline transporters. Does not mediate efficient uptake of basic amino acids in yeast or Xenopus systems but can transport neutral and acidic amino acid analogs.
AT1G17130	Family of unknown function (DUF572) :
AT1G17210	IAP-like protein 1:
AT1G17220	Translation initiation factor 2, small GTP-binding protein:Encodes a chloroplast localized protein with similarity to translation initiation factor 2. Can complement loss of INFB in E.coli suggesting FUG1 does function as a translation initiation factor in vivo. Identified as a suppressor of the leaf variegation mutant var2-6. Suppression is only seen in hypomorphs as complete loss of function al…
AT1G17230	Leucine-rich receptor-like protein kinase family protein:
AT1G17235	ROTUNDIFOLIA like 11:This gene is predicted to encode a small protein with a DVL domain found in the DVL / RTFL protein family. Over-expression analyses using truncated versions of a related family member, ROT4, suggest that the DVL / RTF domain is involved in regulating cell proliferation.
AT1G17280	ubiquitin-conjugating enzyme 34:
AT1G17285	unknown
AT1G17290	alanine aminotransferas:Encodes for alanine aminotransferase (ALAAT1), involved in alanine catabolism during plants recovery from hypoxia
AT1G17350	NADH:ubiquinone oxidoreductase intermediate-associated protein 30:
AT1G17360	unknown
AT1G17370	oligouridylate binding protein 1B:
AT1G17380	jasmonate-zim-domain protein 5:
AT1G17450	B-block binding subunit of TFIIIC:
AT1G17455	ELF4-like 4:
AT1G17460	TRF-like 3:Arabidopsis thaliana myb family transcription factor (At1g17460)
AT1G17470	developmentally regulated G-protein 1:Encodes a member of the DRG (developmentally regulated G-protein) family expressed throughout the plant, with highest expression in actively growing tissues. Has GTPase activity.
AT1G17480	IQ-domain 7:
AT1G17490	unknown
AT1G17520	Homeodomain-like/winged-helix DNA-binding family protein:
AT1G17530	translocase of inner mitochondrial membrane 23:Encodes a translocase of inner mitochondrial membrane.
AT1G17560	Ribosomal protein L14p/L23e family protein:Mutant shows abnormal ovule development
AT1G17580	myosin 1:Encodes a member of the type XI myosin protein family involved in organelle trafficking and overall plant development.
AT1G17620	Late embryogenesis abundant (LEA) hydroxyproline-rich glycoprotein family:
AT1G17640	RNA-binding (RRM/RBD/RNP motifs) family protein:
AT1G17660	pre-tRNA:
AT1G17670	pre-tRNA:
AT1G17680	tetratricopeptide repeat (TPR)-containing protein:
AT1G17720	Protein phosphatase 2A, regulatory subunit PR55:type 2A protein serine/threonine phosphatase 55 kDa B
AT1G17730	vacuolar protein sorting 46.1:Encodes an ESCRT-related protein: CHMP1A/AT1G73030; CHMP1B/AT1G17730. CHMP1A and B mediate multivesicular body sorting of auxin carriers and are required for plant development. ESCRT: Endosomal Sorting Complexes Required For Transport machinery; CHMP: Charged Multivesicular Body Protein/Chromatin Modifying Protein.
AT1G17750	PEP1 receptor 2:Encodes PEPR2, a plasma membrane leucine-rich repeat receptor kinase functioning as a receptor for the Pep1 and Pep2 peptides. Pep1 and Pep2 are amino acids that induce the transcription of defense-related genes.
AT1G17850	Rhodanese/Cell cycle control phosphatase superfamily protein:
AT1G17860	Kunitz family trypsin and protease inhibitor protein:
AT1G17890	NAD(P)-binding Rossmann-fold superfamily protein:
AT1G17990	FMN-linked oxidoreductases superfamily protein:
AT1G18000	Major facilitator superfamily protein:
AT1G18010	Major facilitator superfamily protein:
AT1G18020	FMN-linked oxidoreductases superfamily protein:
AT1G18030	Protein phosphatase 2C family protein:
AT1G18070	Translation elongation factor EF1A/initiation factor IF2gamma family protein:
AT1G18075	MIR159/MIR159B; miRNA:Encodes a microRNA that targets several MYB family members. MicroRNAs are regulatory RNAs with a mature length of ~21-nucleotides that are processed from hairpin precursors by Dicer-like enzymes. MicroRNAs can negatively regulate gene expression by attenuating translation or by directing mRNA cleavage.Mature sequence: UUUGGAUUGAAGGGAGCUCUU. Functions redundantly with MIR159A…
AT1G18080	Transducin/WD40 repeat-like superfamily protein:Encodes the Arabidopsis thaliana homolog of the tobacco WD-40 repeat ArcA gene.
AT1G18090	5'-3' exonuclease family protein:
AT1G18150	Protein kinase superfamily protein:ATMPK8,
AT1G18160	Protein kinase superfamily protein:
AT1G18200	RAB GTPase homolog A6B:
AT1G18210	Calcium-binding EF-hand family protein:
AT1G18300	nudix hydrolase homolog 4:
AT1G18310	glycosyl hydrolase family 81 protein:
AT1G18320	Mitochondrial import inner membrane translocase subunit Tim17/Tim22/Tim23 family protein:
AT1G18330	Homeodomain-like superfamily protein:EARLY-PHYTOCHROME-RESPONSIVE1
AT1G18335	Acyl-CoA N-acyltransferases (NAT) superfamily protein:
AT1G18340	basal transcription factor complex subunit-related:
AT1G18382	other RNA:Potential natural antisense gene, locus overlaps with AT1G18380
AT1G18390	Protein kinase superfamily protein:
AT1G18460	alpha/beta-Hydrolases superfamily protein:
AT1G18470	Transmembrane Fragile-X-F-associated protein:
AT1G18480	Calcineurin-like metallo-phosphoesterase superfamily protein:
AT1G18620	unknown
AT1G18670	Protein kinase superfamily protein:Encodes a cyclin-dependent kinase-like protein with a ser/thr protein kinase domain and an N-terminal myristoylation sequence. Mutants in this gene are unable to express female sterility in response to beta-aminobutyric acid, as wild type plants do.
AT1G18680	HNH endonuclease domain-containing protein:
AT1G18690	Galactosyl transferase GMA12/MNN10 family protein:
AT1G18700	DNAJ heat shock N-terminal domain-containing protein:
AT1G18720	Protein of unknown function (DUF962):
AT1G18730	NDH dependent flow 6:likely a subunit of the chloroplast NAD(P)H dehydrogenase complex, involved in PSI cyclic electron transport. Located on the thylakoid membrane. Mutant has impaired NAD(P)H dehydrogenase activity.
AT1G18740	Protein of unknown function (DUF793):
AT1G18745	other RNA
AT1G18750	AGAMOUS-like 65:Encodes a member of the MIKC (MADS box, Keratin binding domain, and C terminal domain containing )family of transcriptional regulators. AGL65 is expressed in pollen.It forms heterodimers with other MICK family members (AGL104). Involved in late stages of pollen development and pollen tube growth.
AT1G18820	pre-tRNA:
AT1G18830	Transducin/WD40 repeat-like superfamily protein:
AT1G18900	Pentatricopeptide repeat (PPR) superfamily protein:
AT1G18970	germin-like protein 4:Encodes a germin-like protein with possible oxalate oxidase activity (based on GenBank record).
AT1G18990	Protein of unknown function, DUF593:
AT1G19000	Homeodomain-like superfamily protein:
AT1G19010	unknown
AT1G19050	response regulator 7:Encodes a member of the Arabidopsis response regulator (ARR) family, most closely related to ARR15. A two-component response regulator protein containing a phosphate accepting domain in the receiver domain but lacking a DNA binding domain in the output domain. Involved in response to cytokinin and meristem stem cell maintenance. Arr7 protein is stabilized by cytokinin.
AT1G19110	inter-alpha-trypsin inhibitor heavy chain-related:
AT1G19120	Small nuclear ribonucleoprotein family protein:
AT1G19140	unknown
AT1G19150	photosystem I light harvesting complex gene 6:PSI type II chlorophyll a/b-binding protein (Lhca2*1) mRNA,
AT1G19180	jasmonate-zim-domain protein 1:JAZ1 is a nuclear-localized protein involved in jasmonate signaling. JAZ1 transcript levels rise in response to a jasmonate stimulus. JAZ1 can interact with the COI1 F-box subunit of an SCF E3 ubiquitin ligase in a yeast-two-hybrid assay only in the presence of jasmonate-isoleucine (JA-ILE) or coronatine. Application of jasmonate methyl ester to Arabidopsis roots re…
AT1G19190	alpha/beta-Hydrolases superfamily protein:
AT1G19210	Integrase-type DNA-binding superfamily protein:encodes a member of the DREB subfamily A-5 of ERF/AP2 transcription factor family. The protein contains one AP2 domain. There are 15 members in this subfamily including RAP2.1, RAP2.9 and RAP2.10.
AT1G19240	unknown
AT1G19250	flavin-dependent monooxygenase 1:FMO1 is required for full expression of TIR-NB-LRRÂ–conditioned resistance to avirulent pathogens and for basal resistance to invasive virulent pathogens. Functions in an EDS1-regulated but SA-independent mechanism that promotes resistance and cell death at pathogen infection sites.
AT1G19300	Nucleotide-diphospho-sugar transferases superfamily protein:The PARVUS/GLZ1 gene encodes a putative family 8 glycosyl transferase that contributes to xylan biosynthesis. Its gene expression shows good co-variance with the IRX3 gene involved in secondary cell wall synthesis. PARVUS/GLZ1 is predicted to have galacturonosyltransferase activity and may be involved in the formation of the complex olig…
AT1G19310	RING/U-box superfamily protein:
AT1G19330	unknown
AT1G19340	Methyltransferase MT-A70 family protein:
AT1G19350	Brassinosteroid signalling positive regulator (BZR1) family protein:Encodes brassinosteroid (BR) signalling protein that accumulates in the nucleus as dephosphorylated form in response to BRs. Is phosphorylated by the BIN2 GSK3 kinase. It synergistically interacts with BIM1 to bind to E box sequences (CANNTG). The protein contains a nuclear localization signal (NLS), followed by a highly conserve…
AT1G19360	Nucleotide-diphospho-sugar transferase family protein:
AT1G19373	snoRNA:
AT1G19376	snoRNA:
AT1G19380	Protein of unknown function (DUF1195):
AT1G19400	Erythronate-4-phosphate dehydrogenase family protein:
AT1G19410	FBD / Leucine Rich Repeat domains containing protein:
AT1G19430	S-adenosyl-L-methionine-dependent methyltransferases superfamily protein:
AT1G19440	3-ketoacyl-CoA synthase 4:Encodes KCS4, a member of the 3-ketoacyl-CoA synthase family involved in the biosynthesis of VLCFA (very long chain fatty acids).
AT1G19460	Galactose oxidase/kelch repeat superfamily protein:
AT1G19480	DNA glycosylase superfamily protein:
AT1G19485	Transducin/WD40 repeat-like superfamily protein:
AT1G19490	Basic-leucine zipper (bZIP) transcription factor family protein:
AT1G19530	unknown
AT1G19540	NmrA-like negative transcriptional regulator family protein:
AT1G19570	dehydroascorbate reductase:Encodes a member of the dehydroascorbate reductase gene family. Critical for a mutualistic symbiosis between the host Arabidopsis and the root colonizing fungus Piriformospora indica.
AT1G19580	gamma carbonic anhydrase 1:Encodes mitochondrial gamma carbonic anhydrase. Component of the NADH dehydrogenase complex.
AT1G19660	Wound-responsive family protein:
AT1G19690	NAD(P)-binding Rossmann-fold superfamily protein:
AT1G19710	UDP-Glycosyltransferase superfamily protein:
AT1G19720	Pentatricopeptide repeat (PPR-like) superfamily protein:
AT1G19730	Thioredoxin superfamily protein:encodes a cytosolic thioredoxin that reduces disulfide bridges of target proteins by the reversible formation of a disulfide bridge between two neighboring Cys residues present in the active site. Thioredoxins have been found to regulate a variety of biological reactions in prokaryotic and eukaryotic cells.
AT1G19740	ATP-dependent protease La (LON) domain protein:
AT1G19750	Transducin/WD40 repeat-like superfamily protein:
AT1G19770	purine permease 14:Member of a family of proteins related to PUP1, a purine transporter. May be involved in the transport of purine and purine derivatives such as cytokinins, across the plasma membrane.
AT1G19800	trigalactosyldiacylglycerol 1:Encodes a permease-like protein involved in lipid transfer from the ER to the chloroplast, more specifically, transfer of phosphatidate across the chloroplast inner membrane. Mutant leaves accumulate trigalactosyldiacylglycerol, triacylglycerol and phosphatidate. Chloroplast lipids are altered in their fatty acid composition and as a consequence the development of ch…
AT1G19835	Plant protein of unknown function (DUF869):
AT1G19870	IQ-domain 32:
AT1G19880	Regulator of chromosome condensation (RCC1) family protein:
AT1G19890	male-gamete-specific histone H3:histone 3.3, male-gamete-specific expression
AT1G19910	ATPase, F0/V0 complex, subunit C protein:vacuolar H+-pumping ATPase 16 kDa proteolipid (ava-p2)
AT1G19920	Pseudouridine synthase/archaeosine transglycosylase-like family protein:encodes a chloroplast form of ATP sulfurylase
AT1G19930	Galactose oxidase/kelch repeat superfamily protein:
AT1G19970	ER lumen protein retaining receptor family protein:
AT1G19980	cytomatrix protein-related:
AT1G20010	tubulin beta-5 chain:beta tubulin
AT1G20040	pre-tRNA:
AT1G20050	C-8,7 sterol isomerase:C-8 sterol isomerase
AT1G20080	Calcium-dependent lipid-binding (CaLB domain) family protein:
AT1G20090	RHO-related protein from plants 2:Member of the Rho GTPase family. Functions to organize the microtubular cytoskeleton in combination with RIC1 and RIC4. These interactions affect pavement cell morphogenesis and pollen tube growth. ROP2 expression is stimulated by brassinosteroid treatment. Inhibit light-induced stomatal opening.
AT1G20100	unknown
AT1G20110	RING/FYVE/PHD zinc finger superfamily protein:
AT1G20170	pre-tRNA:
AT1G20180	Protein of unknown function (DUF677):
AT1G20200	PAM domain (PCI/PINT associated module) protein:
AT1G20210	pre-tRNA:
AT1G20250	pre-tRNA:
AT1G20260	ATPase, V1 complex, subunit B protein:
AT1G20270	2-oxoglutarate (2OG) and Fe(II)-dependent oxygenase superfamily protein:
AT1G20280	homeobox-leucine zipper protein-related:
AT1G20330	sterol methyltransferase 2:Encodes a sterol-C24-methyltransferases involved in sterol biosynthesis. Mutants display altered sterol composition, serrated petals and sepals and altered cotyledon vascular patterning as well as ectopic endoreduplication. This suggests that suppression of endoreduplication is important for petal morphogenesis and that normal sterol composition is required for this sup…
AT1G20340	Cupredoxin superfamily protein:recombination and DNA-damage resistance protein (DRT112) One of two Arabidopsis plastocyanin genes. Predominant form, expressed 10x higher than PETE1. PETE2 is thought to be post-transcriptionally regulated via copper accumulation and is involved in copper homeostasis.
AT1G20350	translocase inner membrane subunit 17-1:mitochondrial inner membrane translocase
AT1G20380	Prolyl oligopeptidase family protein:
AT1G20410	Pseudouridine synthase family protein:
AT1G20420	pre-tRNA:
AT1G20430	unknown
AT1G20440	cold-regulated 47:Belongs to the dehydrin protein family, which contains highly conserved stretches of 7-17 residues that are repetitively scattered in their sequences, the K-, S-, Y- and lysine rich segments. Cold regulated gene, amino acid sequence homology with Group II LEA (late embryogenesis abundant) proteins. Also responds to osmotic stress, ABA, dehydration and inhibits e.coli growth whil…
AT1G20450	Dehydrin family protein:Encodes a gene induced by low temperature and dehydration. Inhibits e.coli growth while overexpressed. Belongs to the dehydrin protein family, which contains highly conserved stretches of 7-17 residues that are repetitively scattered in their sequences, the K-, S-, Y- and lysine rich segments. LTI29 and LTI30 double overexpressors confer cold tolerance. Localized to membra…
AT1G20460	unknown
AT1G20510	OPC-8:0 CoA ligase1:
AT1G20515	other RNA:Potential natural antisense gene, locus overlaps with AT1G20520
AT1G20620	catalase 3:Catalase, catalyzes the breakdown of hydrogen peroxide (H2O2) into water and oxygen.
AT1G20630	catalase 1:Catalyzes the reduction of hydrogen peroxide using heme group as cofactor. Protects cells from toxicity by H2O2.
AT1G20650	Protein kinase superfamily protein:
AT1G20670	DNA-binding bromodomain-containing protein:
AT1G20690	SWI-SNF-related chromatin binding protein:
AT1G20691	Potential natural antisense gene, locus overlaps with AT1G20690
AT1G20693	high mobility group B2:Encodes a protein belonging to the subgroup of HMGB (high mobility group B) proteins that have a distinctive DNA-binding motif, the HMG-box domain. The motif confers non-sequence specific interaction with linear DNA and structure-specific binding to distorted DNA sites. The HMGB proteins are involved in the assembly of nucleoprotein complexes. Can be phosphorylated by CK2al…
AT1G20696	high mobility group B3:Encodes a protein belonging to the subgroup of HMGB (high mobility group B) proteins that have a distinctive DNA-binding motif, the HMG-box domain. The motif confers non-sequence specific interaction with linear DNA and structure-specific binding to distorted DNA sites. The HMGB proteins are involved in the assembly of nucleoprotein complexes. Can be phosphorylated by CK2al…
AT1G20750	RAD3-like DNA-binding helicase protein:
AT1G20760	Calcium-binding EF hand family protein:
AT1G20770	unknown
AT1G20780	senescence-associated E3 ubiquitin ligase 1:Encodes a protein containing a U-box and an ARM domain.
AT1G20800	F-box family protein:F-box family protein
AT1G20810	FKBP-like peptidyl-prolyl cis-trans isomerase family protein:
AT1G20820	pre-tRNA:
AT1G20830	multiple chloroplast division site 1:Encodes MCD1 (MULTIPLE CHLOROPLAST DIVISION SITE 1). Determines the site of chloroplast division in concert with MinD (AT5G24020).
AT1G20840	tonoplast monosaccharide transporter1:The protein encoded by this gene is found in the tonoplast (vacuole membrane) of Arabidopsis cells. The gene is expressed at highest levels in juvenile (sink) and adult (source) leaves, followed by flower tissues.
AT1G20870	HSP20-like chaperones superfamily protein:
AT1G20875	unknown
AT1G20890	unknown
AT1G20920	P-loop containing nucleoside triphosphate hydrolases superfamily protein:
AT1G20960	U5 small nuclear ribonucleoprotein helicase, putative:
AT1G20970	unknown
AT1G20980	squamosa promoter binding protein-like 14:Encodes a nuclear plant-specific protein with features characteristic of a transcriptional regulator, including a nuclear localization signal sequence, a plant-specific DNA binding domain (the SBP box), and a protein interaction motif (ankyrin repeats). It unctions as a transcriptional regulator that plays a role not only in sensitivity to FB1, but also i…
AT1G21000	PLATZ transcription factor family protein:
AT1G21050	Protein of unknown function, DUF617:
AT1G21060	Protein of unknown function, DUF547:
AT1G21065	unknown
AT1G21080	DNAJ heat shock N-terminal domain-containing protein:
AT1G21120	O-methyltransferase family protein:
AT1G21130	O-methyltransferase family protein:
AT1G21190	Small nuclear ribonucleoprotein family protein:
AT1G21200	sequence-specific DNA binding transcription factors:
AT1G21250	cell wall-associated kinase:cell wall-associated kinase, may function as a signaling receptor of extracellular matrix component such as oligogalacturonides.
AT1G21270	wall-associated kinase 2:cytoplasmic serine/threonine protein kinase induced by salicylic acid. mutant plants exhibit a loss of cell expansion and dependence on sugars and salts for seedling growth, affecting the expression and activity of vacuolar invertase.
AT1G21280	unknown
AT1G21281	unknown
AT1G21350	Thioredoxin superfamily protein:
AT1G21380	Target of Myb protein 1:
AT1G21400	Thiamin diphosphate-binding fold (THDP-binding) superfamily protein:
AT1G21450	SCARECROW-like 1:Encodes a scarecrow-like protein (SCL1). Member of GRAS gene family.
AT1G21480	Exostosin family protein:
AT1G21550	Calcium-binding EF-hand family protein:
AT1G21560	unknown
AT1G21580	Zinc finger C-x8-C-x5-C-x3-H type family protein:
AT1G21590	Protein kinase protein with adenine nucleotide alpha hydrolases-like domain:
AT1G21600	plastid transcriptionally active 6:Present in transcriptionally active plastid chromosomes. Involved in plastid gene expression.
AT1G21640	NAD kinase 2:Encodes a protein with NAD kinase activity. The protein was also shown to bind calmodulin.
AT1G21670	unknown
AT1G21680	DPP6 N-terminal domain-like protein:
AT1G21690	ATPase family associated with various cellular activities (AAA) :
AT1G21700	SWITCH/sucrose nonfermenting 3C:a member of the Arabidopsis SWI3 gene family. Protein physically interacts with ATSWI3B and ATSWI3A, the other two members of the SWI3 family. Homologous to yeast SWI3 & RSC8, components of the SWI/SNF and RSC chromatin remodeling complexes. Referred to as CHB3 in Zhou et al (2003).
AT1G21710	8-oxoguanine-DNA glycosylase 1:Encodes 8-oxoguanine-DNA glycosylase. DNA repair enzyme.
AT1G21750	PDI-like 1-1:Encodes a protein disulfide isomerase-like (PDIL) protein, a member of a multigene family within the thioredoxin (TRX) superfamily; isoform contains non-consensus GA donor splice site at intron 9. Transcript levels for this gene are up-regulated in response to three different chemical inducers of ER stress (dithiothreitol, beta-mercaptoethanol, and tunicamycin). Neither AtIRE1-2 nor …
AT1G21790	TRAM, LAG1 and CLN8 (TLC) lipid-sensing domain containing protein:
AT1G21880	lysm domain GPI-anchored protein 1 precursor:
AT1G21900	emp24/gp25L/p24 family/GOLD family protein:
AT1G21910	Integrase-type DNA-binding superfamily protein:encodes a member of the DREB subfamily A-5 of ERF/AP2 transcription factor family. The protein contains one AP2 domain. There are 15 members in this subfamily including RAP2.1, RAP2.9 and RAP2.10.
AT1G21920	Histone H3 K4-specific methyltransferase SET7/9 family protein:
AT1G21975	unknown
AT1G22060	unknown
AT1G22070	TGA1A-related gene 3:Encodes a transcription factor. Like other TGAla-related factors, TGA3 has a highly conserved bZIP region and exhibits similar DNA-binding properties.
AT1G22130	AGAMOUS-like 104:Encodes a member of the MIKC (MADS box, Keratin binding domain, and C terminal domain containing )family of transcriptional regulators. AGL104 is expressed in pollen.It forms heterodimers with other MICK family members (AGL65 and AGL30). Involved in late stages of pollen development and pollen tube growth.
AT1G22190	Integrase-type DNA-binding superfamily protein:
AT1G22200	Endoplasmic reticulum vesicle transporter protein:
AT1G22210	Haloacid dehalogenase-like hydrolase (HAD) superfamily protein:
AT1G22300	general regulatory factor 10:Encodes a 14-3-3 protein. This protein is reported to interact with the BZR1 transcription factor involved in brassinosteroid signaling and may affect the nucleocytoplasmic shuttling of BZR1.
AT1G22310	methyl-CPG-binding domain 8:Protein containing methyl-CpG-binding domain.Has sequence similarity to human MBD proteins.
AT1G22330	RNA-binding (RRM/RBD/RNP motifs) family protein:
AT1G22400	UDP-Glycosyltransferase superfamily protein:
AT1G22403	unknown
AT1G22410	Class-II DAHP synthetase family protein:
AT1G22450	cytochrome C oxidase 6B:subunit 6b of cytochrome c oxidase
AT1G22500	RING/U-box superfamily protein:
AT1G22510	RING/U-box protein with domain of unknown function (DUF 1232):
AT1G22520	Domain of unknown function (DUF543):
AT1G22530	PATELLIN 2:
AT1G22600	Late embryogenesis abundant protein (LEA) family protein:
AT1G22620	Phosphoinositide phosphatase family protein:SAC domain phosphoinositide (3,5)P2 phosphatase. Colocalized with a Golgi Marker. Required for normal cell morphogenesis, cell wall synthesis, and actin organization.
AT1G22630	unknown
AT1G22640	myb domain protein 3:MYB-type transcription factor (MYB3) that represses phenylpropanoid biosynthesis gene expression
AT1G22650	Plant neutral invertase family protein:
AT1G22651	unknown
AT1G22660	Polynucleotide adenylyltransferase family protein:
AT1G22767	unknown
AT1G22770	gigantea protein (GI):Together with CONSTANTS (CO) and FLOWERING LOCUS T (FT), GIGANTEA promotes flowering under long days in a circadian clock-controlled flowering pathway. GI acts earlier than CO and FT in the pathway by increasing CO and FT mRNA abundance. Located in the nucleus. Regulates several developmental processes, including photoperiod-mediated flowering, phytochrome B signaling, circa…
AT1G22780	Ribosomal protein S13/S18 family:S18 ribosomal protein involved in the binding of f-Met tRNA during initiation of mRNA translation. Expression restricted to meristems. Mutant phenotype-pointed first leaves,reduced fresh weight, growth retardation.
AT1G22810	Integrase-type DNA-binding superfamily protein:encodes a member of the DREB subfamily A-5 of ERF/AP2 transcription factor family. The protein contains one AP2 domain. There are 16 members in this subfamily including RAP2.1, RAP2.9 and RAP2.10.
AT1G22830	Tetratricopeptide repeat (TPR)-like superfamily protein:
AT1G22882	Galactose-binding protein:
AT1G22885	unknown
AT1G22900	Disease resistance-responsive (dirigent-like protein) family protein:
AT1G22910	RNA-binding (RRM/RBD/RNP motifs) family protein:
AT1G22970	unknown
AT1G23020	ferric reduction oxidase 3:Encodes a ferric chelate reductase whose transcription is regulated by FIT1. Expressed in the root, shoot, flower and cotyledon.
AT1G23030	ARM repeat superfamily protein:
AT1G23052	other RNA
AT1G23080	Auxin efflux carrier family protein:Encodes a novel component of auxin efflux that is located apically in the basal cell and is involved during embryogenesis in setting up the apical-basal axis in the embryo. It is also involved in pattern specification during root development. In roots, it is expressed at lateral and basal membranes of provascular cells in the meristem and elongation zone, where…
AT1G23110	unknown
AT1G23120	Polyketide cyclase/dehydrase and lipid transport superfamily protein:
AT1G23210	glycosyl hydrolase 9B6:
AT1G23220	Dynein light chain type 1 family protein:
AT1G23280	MAK16 protein-related:
AT1G23290	Ribosomal protein L18e/L15 superfamily protein:Encodes a ribosomal protein L27A, a constituent of the large subunit of the ribosomal complex. Regulated by TCP20.
AT1G23310	glutamate:glyoxylate aminotransferase:Identified by cloning the gene that corresponded to a purified protein having glyoxylate aminotransferase activity. Localized to the peroxisome and thought to be involved in photorespiration/ metabolic salvage pathway.
AT1G23390	Kelch repeat-containing F-box family protein:
AT1G23440	Peptidase C15, pyroglutamyl peptidase I-like:
AT1G23490	ADP-ribosylation factor 1:Gene encoding ADP-ribosylation factor and similar to other ARFs and ARF-like proteins. A member of ARF GTPase family. Arabidopsis has 21 known members, known to be essential for vesicle coating and uncoating and functions in GTP-binding. The gene is shown to play a role in cell division, cell expansion and cellulose production using antisense construct.
AT1G23540	Protein kinase superfamily protein:Encodes a member of the PERK family of putative receptor kinases. Overexpression leads to morphological defects and reduced fertility and increased expression of MAX genes.
AT1G23550	similar to RCD one 2:Encodes a protein with similarity to RCD1 but without the WWE domain. The protein does have a PARP signature upstream of the C-terminal protein interaction domain. The PARP signature may bind NAD+ and attach the ADP-ribose-moiety from NAD+ to the target molecule. Its presence suggests a role for the protein in ADP ribosylation.
AT1G23710	Protein of unknown function (DUF1645):
AT1G23740	Oxidoreductase, zinc-binding dehydrogenase family protein:
AT1G23750	Nucleic acid-binding, OB-fold-like protein:
AT1G23770	F-box family protein:
AT1G23780	F-box family protein:
AT1G23860	RS-containing zinc finger protein 21:Encodes a 9G8-like serine-arginine rich (SR) protein that interacts in vivo with U1-70K, a U1 small nuclear ribonucleoprotein 70-kDa protein that is involved in nuclear precursor mRNA processing.
AT1G23870	trehalose-phosphatase/synthase 9:Encodes an enzyme putatively involved in trehalose biosynthesis. The protein has a trehalose synthase (TPS)-like domain that may or may not be active as well as a trehalose phosphatase (TPP)-like domain.
AT1G23890	NHL domain-containing protein:
AT1G23900	gamma-adaptin 1:Encodes large subunit of the heterotetrameric adaptor protein complex AP-1. AP-1 is required for clathrin coated vesicles budding from the trans-Golgi network or plasma membrane
AT1G23960	Protein of unknown function (DUF626):
AT1G23965	unknown
AT1G24040	Acyl-CoA N-acyltransferases (NAT) superfamily protein:
AT1G24050	RNA-processing, Lsm domain:
AT1G24090	RNase H family protein:
AT1G24095	Putative thiol-disulphide oxidoreductase DCC
AT1G24100	UDP-glucosyl transferase 74B1:Encodes a UDP-glucose:thiohydroximate S-glucosyltransferase, involved in glucosinolate biosynthesis
AT1G24120	ARG1-like 1:encodes a DnaJ-like protein similar to ARG1 and ARL2 that are both involved in root and hypocotyl gravitropism response. However, null mutation in this gene does not result in defects in gravitropism. Gene is expressed in all tissues examined.
AT1G24140	Matrixin family protein:
AT1G24145	unknown
AT1G24148	unknown
AT1G24150	formin homologue 4:Encodes a group I formin. Localized to cell junctions. Polymerizes actin. Binds profilin.
AT1G24170	Nucleotide-diphospho-sugar transferases superfamily protein:Encodes a protein with putative galacturonosyltransferase activity.
AT1G24260	K-box region and MADS-box transcription factor family protein :Member of the MADs box transcription factor family. SEP3 is redundant with SEP1 and 2. Flowers of SEP1/2/3 triple mutants show a conversion of petals and stamens to sepals.SEP3 forms heterotetrameric complexes with other MADS box family members and binds to the CArG box motif.
AT1G24510	TCP-1/cpn60 chaperonin family protein:
AT1G24520	homolog of Brassica campestris pollen protein 1:Male fertility gene acting on tapetum and microspore
AT1G24793	UDP-3-O-acyl N-acetylglycosamine deacetylase family protein:
AT1G24800	F-box family protein:
AT1G24822	unknown
AT1G24880	UDP-3-O-acyl N-acetylglycosamine deacetylase family protein:
AT1G25054	UDP-3-O-acyl N-acetylglycosamine deacetylase family protein:
AT1G25097	unknown
AT1G25098	other RNA:Potential natural antisense gene, locus overlaps with AT1G25097
AT1G25175	other RNA:
AT1G25180	unknown
AT1G25220	anthranilate synthase beta subunit 1:Catalyzes the first step of tryptophan biosynthesis: Chorismate L-Glutamine = Anthranilate Pyruvate L-Glutamate. Functions as a heterocomplex with anthranilate synthase alpha subunit (ASA1 or ASA2).
AT1G25260	Ribosomal protein L10 family protein:
AT1G25275	unknown
AT1G25320	Leucine-rich repeat protein kinase family protein:
AT1G25375	Metallo-hydrolase/oxidoreductase superfamily protein:
AT1G25380	NAD+ transporter 2:Encodes a mitochondrial-localized NAD+ transporter that transports NAD+ in a counter exchange mode with ADP and AMP in vitro.
AT1G25390	Protein kinase superfamily protein:
AT1G25400	unknown
AT1G25440	B-box type zinc finger protein with CCT domain:
AT1G25490	ARM repeat superfamily protein:One of three genes encoding phosphoprotein phosphatase 2A regulatory subunit A; Recessive ethylene-response mutant EER1 displays increased ethylene sensitivity in the hypocotyl and stem
AT1G25510	Eukaryotic aspartyl protease family protein:
AT1G25520	Uncharacterized protein family (UPF0016):
AT1G25540	phytochrome and flowering time regulatory protein (PFT1):Encodes a nuclear protein that acts in a phyB pathway (but downstream of phyB) and induces flowering in response to suboptimal light conditions. Mutants are hypo-responsive to far-red and hyper-responsive to red light and flower late under long day conditions. Also shown to be a Mediator subunit regulating jasmonate-dependent defense.
AT1G25550	myb-like transcription factor family protein:
AT1G25560	AP2/B3 transcription factor family protein:Encodes a member of the RAV transcription factor family that contains AP2 and B3 binding domains. Involved in the regulation of flowering under long days. Loss of function results in early flowering. Overexpression causes late flowering and repression of expression of FT. Novel transcriptional regulator involved in ethylene signaling. Promoter bound by E…
AT1G25682	Family of unknown function (DUF572) :
AT1G26090	P-loop containing nucleoside triphosphate hydrolases superfamily protein:
AT1G26150	proline-rich extensin-like receptor kinase 10:
AT1G26208	other RNA:Potential natural antisense gene, locus overlaps with AT1G26210
AT1G26230	TCP-1/cpn60 chaperonin family protein:
AT1G26233	SNOR95; snoRNA:Encodes a H/ACA-box snoRNA (snoR95). Gb: AJ505672
AT1G26235	other RNA:Encodes a snmRNA. Gb: AJ505711
AT1G26270	Phosphatidylinositol 3- and 4-kinase family protein:
AT1G26290	unknown
AT1G26300	BSD domain-containing protein:
AT1G26370	RNA helicase family protein:
AT1G26480	general regulatory factor 12:14-3-3 protein GF14iota (grf12)
AT1G26490	pre-tRNA:
AT1G26500	Pentatricopeptide repeat (PPR) superfamily protein:
AT1G26540	Agenet domain-containing protein:
AT1G26550	FKBP-like peptidyl-prolyl cis-trans isomerase family protein:
AT1G26558	other RNA:Unknown gene
AT1G26630	Eukaryotic translation initiation factor 5A-1 (eIF-5A 1) protein:Eukaryotic translation initiation factor 5A-2. Involved in programmed cell death triggered as a response to pseudomonas syringae infection. Loss of function mutants are more resistant to infection.
AT1G26640	Amino acid kinase family protein:
AT1G26650	unknown
AT1G26670	Vesicle transport v-SNARE family protein:member of VTI1 Gene Family. Normally localizes to the transgolgi network and plasma membrane. A dominant mutation (zip1) alters the subcellular localization of VTI12 and suppresses loss of function mutation (zag1) of VTI11. Interacts with members of the SYP family. Involved in protein trafficking to protein storage vacuoles.
AT1G26730	EXS (ERD1/XPR1/SYG1) family protein:
AT1G26790	Dof-type zinc finger DNA-binding family protein:
AT1G26800	RING/U-box superfamily protein:
AT1G26880	Ribosomal protein L34e superfamily protein:
AT1G26890	FBD, F-box and Leucine Rich Repeat domains containing protein:
AT1G26930	Galactose oxidase/kelch repeat superfamily protein:
AT1G26940	Cyclophilin-like peptidyl-prolyl cis-trans isomerase family protein:
AT1G27050	homeobox protein 54:Encodes a homeodomain leucine zipper class I (HD-Zip I) protein.
AT1G27100	Actin cross-linking protein:
AT1G27130	glutathione S-transferase tau 13:Encodes glutathione transferase belonging to the tau class of GSTs. Naming convention according to Wagner et al. (2002).
AT1G27170	transmembrane receptors;ATP binding:
AT1G27190	Leucine-rich repeat protein kinase family protein:
AT1G27200	Domain of unknown function (DUF23):
AT1G27210	ARM repeat superfamily protein:
AT1G27290	unknown
AT1G27300	unknown
AT1G27320	histidine kinase 3:Encodes a histidine kinases, a cytokinin receptor that controls cytokinin-mediated leaf longevity through a specific phosphorylation of the response regulator, ARR2.
AT1G27330	Ribosome associated membrane protein RAMP4:
AT1G27350	Ribosome associated membrane protein RAMP4:
AT1G27360	squamosa promoter-like 11:In conjunction with SPL10 and SPL2, SPL11 redundantly controls proper development of lateral organs in association with shoot maturation in the reproductive phase.
AT1G27370	squamosa promoter binding protein-like 10:In conjunction with SPL11 and SPL2, SPL10 redundantly controls proper development of lateral organs in association with shoot maturation in the reproductive phase. SPL10 also controls lamina shape during vegetative development.
AT1G27385	unknown
AT1G27430	GYF domain-containing protein:
AT1G27440	Exostosin family protein:
AT1G27450	adenine phosphoribosyl transferase 1:Adenosine phosphoribosyl transferase(E.C:2.4.2.7), involved in the one-step salvage of adenine to AMP.
AT1G27460	no pollen germination related 1:encodes a calmodulin-binding protein that is expressed in pollen, suspension culture cells, flowers, and fruits.
AT1G27470	transducin family protein / WD-40 repeat family protein:
AT1G27480	alpha/beta-Hydrolases superfamily protein:
AT1G27600	Nucleotide-diphospho-sugar transferases superfamily protein:Encodes a member of the GT43 family glycosyltransferases involved in glucuronoxylan biosynthesis: AT2G37090 (IRX9) and AT1G27600 (IRX9-L or I9H, IRX9 homolog); AT4G36890 (IRX14) and AT5G67230 (IRX14-L or I14H, IRX14 homolog). They form two functionally non-redundant groups essential for the normal elongation of glucuronoxylan backbone. I…
AT1G27640	:Putative role in leaf development. Comparison of SALK_123839C to Columbia under normal growth conditions resulted in a trend toward increased leaf length in the mutant (P=0.13; median 22 for mutant,17 for Columbia) (Ann Stapleton and Delita Pardue, 2009, personal communication).
AT1G27650	U2 snRNP auxiliary factor small subunit, putative:U2 auxiliary factor small subunit. The atU2AF35a protein and its homolog, atU2AF35b, contain most of the conserved domains of hsU2AF35, including the psiRRM, one RS domain, two zinc fingers, and the two regions for interacting with U2AF large subunit. Both proteins lack the stretch of glycines present in human U2AF35. The sequences are overall 83%…
AT1G27720	TBP-associated factor 4B:
AT1G27730	salt tolerance zinc finger:Related to Cys2/His2-type zinc-finger proteins found in higher plants. Compensated for a subset of calcineurin deficiency in yeast. Salt tolerance produced by ZAT10 appeared to be partially dependent on ENA1/PMR2, a P-type ATPase required for Li+ and Na+ efflux in yeast. The protein is localized to the nucleus, acts as a transcriptional repressor and is responsive to ch…
AT1G27750	nucleic acid binding:
AT1G27760	interferon-related developmental regulator family protein / IFRD protein family:Encodes a protein with similarity to human interferon-related developmental regulator (IFRD)that is involved in salt tolerance. Loss of function mutations are hypersensitive to salt stress and have reduced fertility. SAT32 is found in the cytoplasm but appears to translocate to the nucleus when plants are subject to s…
AT1G27770	autoinhibited Ca2+-ATPase 1:Encodes a chloroplast envelope Ca2+-ATPase with an N-terminal autoinhibitor.
AT1G27890	Polynucleotidyl transferase, ribonuclease H-like superfamily protein:
AT1G27930	Protein of unknown function (DUF579):Function unknown. Interacts with eIF3.
AT1G27970	nuclear transport factor 2B:Encodes an ortholog of yeast NTF2, a nuclear envelop transport protein that functions as the nuclear import receptor for RanGDP, an essential player in nucleocytoplasmic transport.
AT1G27980	dihydrosphingosine phosphate lyase:
AT1G28060	Pre-mRNA-splicing factor 3:
AT1G28070	unknown
AT1G28140	unknown
AT1G28280	VQ motif-containing protein:
AT1G28281	unknown
AT1G28330	dormancy-associated protein-like 1:dormancy-associated protein (DRM1)
AT1G28335	low-molecular-weight cysteine-rich 31:Encodes a member of a family of small,secreted, cysteine rich protein with sequence similarity to the PCP (pollen coat protein) gene family.
AT1G28375	unknown
AT1G28570	SGNH hydrolase-type esterase superfamily protein:
AT1G29170	SCAR family protein:Encodes a member of the SCAR family.These proteins are part of a complex (WAVE) complex.The SCAR subunit activates the ARP2/3 complex which in turn act as a nucleator for actin filaments.
AT1G29220	transcriptional regulator family protein:
AT1G29250	Alba DNA/RNA-binding protein:
AT1G29260	peroxin 7:Encodes the peroxisomal targeting signal type 2 receptor that facilitates peroxisomal protein translocation. It recognizes proteins with the PTS2 consensus sequence (RLX5HL or a variant) within the first 30 or so amino acids. RNAi experiments suggest that PEX7 is necessary for the maintenance of glyoxysomal but not leaf peroxisomal function.
AT1G29300	Plant protein of unknown function (DUF641):
AT1G29330	ER lumen protein retaining receptor family protein:Encodes a protein similar in sequence to animal and yeast endoplasmic reticulum retention signal receptor. This protein can functionally complement the yeast homologue. Transcript is detected in flower buds, stems, root, and leaves.
AT1G29340	plant U-box 17:Encodes a protein containing a UND, a U-box, and an ARM domain. This protein has E3 ubiquitin ligase activity. It is required for cell death and full resistance specified by Arabidopsis RPM1 and RPS4 resistance proteins against Pseudomonas syringae pv tomato.
AT1G29390	cold regulated 314 thylakoid membrane 2:Integral membrane protein in the inner envelope of chloroplasts. Provide freezing tolerance.
AT1G29395	COLD REGULATED 314 INNER MEMBRANE 1:Integral membrane protein in the inner envelope of chloroplasts. Provide freezing tolerance. Expression is induced by short-term cold-treatment, water deprivation, and abscisic acid treatment.
AT1G29400	MEI2-like protein 5:A member of mei2-like gene family, predominantly plant-based family of genes encoding RNA binding proteins with characteristic presence of a highly conserved RNA binding motif first described in the mei2 gene of the fission yeast S. pombe. In silico analyses reveal nine mei2 -like genes in A. thaliana. They were grouped into four distinct clades, based on overall sequence simi…
AT1G29410	phosphoribosylanthranilate isomerase 3:Encodes phosphoribosylanthranilate isomerase which catalyzes the third step in tryptophan biosynthesis.
AT1G29418	unknown
AT1G29420	SAUR-like auxin-responsive protein family :
AT1G29440	SAUR-like auxin-responsive protein family :
AT1G29460	SAUR-like auxin-responsive protein family :
AT1G29465	unknown
AT1G29470	S-adenosyl-L-methionine-dependent methyltransferases superfamily protein:
AT1G29690	MAC/Perforin domain-containing protein:Encodes a protein containing a domain with significant homology to the MACPF (membrane attack complex and perforin) domain of complements and perforin proteins that are involved in innate immunity in animals. Transgenic <i>cad1-1</i> mutant plants show lesions seen in the hypersensitive response, as well as a spontaneous activation of expression of pathogene…
AT1G29700	Metallo-hydrolase/oxidoreductase superfamily protein:
AT1G29710	Tetratricopeptide repeat (TPR)-like superfamily protein:
AT1G29880	glycyl-tRNA synthetase / glycine--tRNA ligase:
AT1G29890	O-acetyltransferase family protein:
AT1G29900	carbamoyl phosphate synthetase B:carbamoyl phosphate synthetase large chain (CARB) mRNA,
AT1G29910	chlorophyll A/B binding protein 3:member of Chlorophyll a/b-binding protein family
AT1G29920	chlorophyll A/B-binding protein 2:Encodes lhcb1.1 a component of the LHCIIb light harvesting complex associated with photosystem II.
AT1G29930	chlorophyll A/B binding protein 1:Subunit of light-harvesting complex II (LHCII),which absorbs light and transfers energy to the photosynthetic reaction center.
AT1G29970	60S ribosomal protein L18A-1:
AT1G29980	Protein of unknown function, DUF642:
AT1G30000	alpha-mannosidase 3:
AT1G30010	Intron maturase, type II family protein:
AT1G30110	nudix hydrolase homolog 25:
AT1G30120	pyruvate dehydrogenase E1 beta:Encodes a putative plastid pyruvate dehydrogenase E1 beta subunit that is distinct from the mitochondrial pyruvate dehydrogenase E1 beta subunit.
AT1G30130	unknown
AT1G30230	Glutathione S-transferase, C-terminal-like;Translation elongation factor EF1B/ribosomal protein S6:
AT1G30240	unknown
AT1G30360	Early-responsive to dehydration stress protein (ERD4):
AT1G30380	photosystem I subunit K:Encodes subunit K of photosystem I reaction center.
AT1G30500	nuclear factor Y, subunit A7:
AT1G30515	unknown
AT1G30520	acyl-activating enzyme 14:Encodes a chloroplast O-succinylbenzoyl-CoA ligase. Involved in phylloquinone biosynthesis. Knock mutant is seedling lethal.
AT1G30590	RNA polymerase I specific transcription initiation factor RRN3 protein:
AT1G30630	Coatomer epsilon subunit:
AT1G30640	Protein kinase family protein:
AT1G30680	toprim domain-containing protein:
AT1G30690	Sec14p-like phosphatidylinositol transfer family protein:
AT1G30810	Transcription factor jumonji (jmj) family protein / zinc finger (C5HC2 type) family protein:
AT1G30880	unknown
AT1G30890	Integral membrane HRF1 family protein:
AT1G31010	organellar single-stranded DNA binding protein 4:
AT1G31020	thioredoxin O2:
AT1G31070	N-acetylglucosamine-1-phosphate uridylyltransferase 1:Encodes a protein that functions as an N-acetylglucosamine-1-phosphate uridylyltransferase that catalyzes the formation of UDP-N-acetylglucosamine (UDP-GlcNAc). This is an essential precursor for glycolipid and glycoprotein synthesis and is also used for regulatory protein modification in signaling pathways. The enzyme can also catalyze the re…
AT1G31140	GORDITA:Encodes a B-sister MADS-box protein, GORDITA which is specific to the Brassicaceae. GOA is the most closely related paralog of ABS. GOA represses fruit growth and contributes to integument development. Over-expression of GOA results in disorganized floral structure and addition of carpel-like features to sepals.
AT1G31150	Domain of unknown function (DUF1985):
AT1G31180	isopropylmalate dehydrogenase 3:The AtIMD3 is one out of 3 genes encoding the enzyme 3-isopropylmalate dehydrogenase involved in leucine biosynthesis in Arabidopsis. Its subcellular location has been targeted to plastids.
AT1G31190	myo-inositol monophosphatase like 1:Encodes a myo-inositol monophosphatase IMPL1 (myo-Inositol monophosphatase like 1).
AT1G31230	aspartate kinase-homoserine dehydrogenase i:Encodes a bifunctional aspartate kinase/homoserine dehydrogenase. These two activities catalyze the first and the third steps toward the synthesis of the essential amino acids threonine, isoleucine and methionine.
AT1G31240	Bromodomain transcription factor:
AT1G31330	photosystem I subunit F:Encodes subunit F of photosystem I.
AT1G31410	putrescine-binding periplasmic protein-related:
AT1G31420	Leucine-rich repeat protein kinase family protein:Encodes a plasma membrane localized leucine-rich repeat receptor kinase that is involved in cell wall elongation. Loss of function mutations of FEI1 and FEI2 exhibit defects in root and hypocotyl cell elongation. Double mutants are defective in cell wall biosynthesis and have thick hypocotyls, and short, thick roots.
AT1G31460	unknown
AT1G31470	Major facilitator superfamily protein:
AT1G31480	shoot gravitropism 2 (SGR2):encodes a novel protein that may be part of a gene family represented by bovine phosphatidic acid-preferring phospholipase A1 (PA-PLA1)containing a putative transmembrane domain. SGR2 is involved in the formation and function of the vacuole.
AT1G31540	Disease resistance protein (TIR-NBS-LRR class) family:
AT1G31550	GDSL-like Lipase/Acylhydrolase superfamily protein:
AT1G31580	ECS1:Encodes cell wall protein. ECS1 is not a Xcc750 resistance gene, but the genetic data indicate that ECS1 is linked to a locus influencing resistance to Xcc750.
AT1G31600	RNA-binding (RRM/RBD/RNP motifs) family protein:
AT1G31620	unknown
AT1G31660	unknown
AT1G31812	acyl-CoA-binding protein 6:Acyl-CoA-binding protein. Bind acyl-CoA esters and protect acyl-CoAs from degradation by microsomal acyl-hydrolases.
AT1G31817	Ribosomal L18p/L5e family protein:
AT1G31820	Amino acid permease family protein:
AT1G31860	histidine biosynthesis bifunctional protein (HISIE):encodes a bifunctional protein that has phosphoribosyl-ATP pyrophosphohydrolase (PRA-PH) and phosphoribosyl-AMP cyclohydrolase (PRA-CH) activities.
AT1G31870	unknown
AT1G31920	Tetratricopeptide repeat (TPR)-like superfamily protein:
AT1G31930	extra-large GTP-binding protein 3:Encodes XLG3 (extra-large G protein 3) that shows significant similarity to the G protein alpha subunit in its C terminal region. Involved in the regulation of root morphological and growth responses.
AT1G32050	SCAMP family protein:
AT1G32060	phosphoribulokinase:
AT1G32140	F-box family protein:
AT1G32150	basic region/leucine zipper transcription factor 68:Encodes a G group bZIP transcription factor family member that can bind cis elements with an ACGT core, such as G-box, Hex, C-box and As-1. The protein is localized in the nucleus and can homodimerize and can heterodimerize with other G group members.
AT1G32160	Protein of unknown function (DUF760):
AT1G32230	WWE protein-protein interaction domain protein family:Encodes a protein belonging to the (ADP-ribosyl)transferase domain-containing subfamily of WWE protein-protein interaction domain protein family. Superoxide radicals are necessary and sufficient to propagate cell death or lesion formation in rcd1 mutants. Without stress treatment, RCD1 is localized in the nucleus. Under high salt or oxidative …
AT1G32400	tobamovirus multiplication 2A:TOM2A encodes a 280 amino acid putative four-pass transmembrane protein with a C-terminal farnesylation signal, essential for efficient multiplication of tobacco mosaic viruses.
AT1G32460	unknown
AT1G32490	RNA helicase family protein:Encodes a homolog of the yeast PRP2 protein, one of four related DEAH RNA helicases identified as essential cofactors for RNA splicing.
AT1G32500	non-intrinsic ABC protein 6:Encodes a member of a heterogenous group of non-intrinsic ATP-binding cassette (ABC) proteins. Members of this group bear no close resemblance to each other nor to representatives of specific ABC protein subfamilies from other organisms. This grouping is arbitrary and will likely change upon acquisition of further data.
AT1G32550	2Fe-2S ferredoxin-like superfamily protein:Encodes FdC1, a ferredoxin protein capable of alternative electron partitioning. FdC1 level increases in conditions of acceptor limitation at PSI.
AT1G32560	Late embryogenesis abundant protein, group 1 protein:
AT1G32610	hydroxyproline-rich glycoprotein family protein:
AT1G32620	pre-tRNA:
AT1G32630	unknown
AT1G32640	Basic helix-loop-helix (bHLH) DNA-binding family protein:Encodes a MYC-related transcriptional activator with a typical DNA binding domain of a basic helix-loop-helix leucine zipper motif. Binds to an extended G-Box promoter motif. Its transcription is induced by dehydration stress and ABA treatment. Negative regulator of blue lightÂ–mediated photomorphogenic growth and blue and far-red-lightÂ–re…
AT1G32660	F-box and associated interaction domains-containing protein:
AT1G32700	PLATZ transcription factor family protein:
AT1G32730	unknown
AT1G32920	unknown
AT1G32928	unknown
AT1G32940	Subtilase family protein:
AT1G32960	Subtilase family protein:
AT1G33030	O-methyltransferase family protein:
AT1G33040	nascent polypeptide-associated complex subunit alpha-like protein 5:
AT1G33060	NAC 014:
AT1G33140	Ribosomal protein L6 family:Encodes ribosomal protein L9. Identified in a screen for enhancers of as1. as1/pgy double mutants show defects in leaf vascular patterning and adaxial cell fate. Double mutant analysis indicates pgy genes function in the same pathway as REV, KAN1 and KAN2.
AT1G33240	GT-2-like 1:Encodes a plant transcriptional activator that contains two separate, but similar, trihelix DNA-binding domains, similar to GT-2. Gene is expressed in all aerial parts of the plant, with higher level of expression in siliques. At-GTL2 was thought to be a duplicated copy of this gene but is likely to be a cloning artefact, the result of a chimeric clone. Regulates ploidy-dependent cell…
AT1G33250	Protein of unknown function (DUF604):
AT1G33260	Protein kinase superfamily protein:
AT1G33415	other RNA:Potential natural antisense gene, locus overlaps with AT1G33420 and AT1G33430
AT1G33420	RING/FYVE/PHD zinc finger superfamily protein:
AT1G33520	D111/G-patch domain-containing protein:Has single homolog in Arabidopsis, also homologs in human, mouse and C. elegans; contains one G-patch domain (known to mediate RNA-protein interactions) and two KOW domains (may bind RNA and/or protein); localized to the nucleus; mutant suppresses high SA levels and constitutive disease resistance in snc1 npr1 background; required for basal resistance agains…
AT1G33530	F-box family protein:
AT1G33560	Disease resistance protein (CC-NBS-LRR class) family:Encodes a NBS-LRR disease resistance protein that possesses N-terminal kinase subdomains. Activation tagged mutant of ADR1 showed elevated levels of SA and reactive oxygen species in addition to number of defense gene transcripts. Exhibits resistance to number of microbial pathogens.
AT1G33590	Leucine-rich repeat (LRR) family protein:
AT1G33600	Leucine-rich repeat (LRR) family protein:
AT1G33610	Leucine-rich repeat (LRR) family protein:
AT1G33970	P-loop containing nucleoside triphosphate hydrolases superfamily protein:
AT1G33980	Smg-4/UPF3 family protein:Involved in mRNA surveillance, detects exported mRNAs with truncated open reading frames and initiates nonsense-mediated mRNA decay (NMD)
AT1G34000	one-helix protein 2:Encodes a novel member of the Lhc family from Arabidopsis with one predicted transmembrane alpha-helix closely related to helix I of Lhc protein from PSI (Lhca4). Gene expression is triggered by light stress and both transcript and protein accumulate in a light intensity-dependent manner. Ohp2 is associated with PSI under low- or high-light conditions.
AT1G34010	unknown
AT1G34180	NAC domain containing protein 16:
AT1G34190	NAC domain containing protein 17:
AT1G34245	Putative membrane lipoprotein:Encodes a secretory peptide EPF2 expressed in proliferating cells of the stomatal lineage, known as meristemoids, and in guard mother cells, the progenitors of stomata. Controls asymmetric cell divisions during stomatal development. EPF2 is related to EPF1, also involved in stomatal development.
AT1G34350	unknown
AT1G34418	other RNA:Unknown gene
AT1G34420	leucine-rich repeat transmembrane protein kinase family protein:
AT1G35140	Phosphate-responsive 1 family protein:At1g35140 (At1g35140/T32G9_32) mRNA, complete cds
AT1G35210	unknown
AT1G35340	ATP-dependent protease La (LON) domain protein:
AT1G35350	EXS (ERD1/XPR1/SYG1) family protein:
AT1G35460	basic helix-loop-helix (bHLH) DNA-binding superfamily protein:
AT1G35710	Protein kinase family protein with leucine-rich repeat domain:
AT1G37130	nitrate reductase 2:Identified as a mutant resistant to chlorate. Encodes nitrate reductase structural gene. Involved in nitrate assimilation. Has nitrate reductase activity. Up-regulated by the fungus P. indica. Binds transcription factor At2g35940.
AT1G44446	Pheophorbide a oxygenase family protein with Rieske [2Fe-2S] domain:Encodes chlorophyllide <i>a</i> oxygenase which converts chlorophyllide <i>a</i> to chlorophyllide <i>b</i> by catalyzing two successive hydroxylations at the 7-methyl group of chlorophyllide <i>a</i> . Mutants are deficient in pigments that associate with thylakoid membrane proteins, lacking chlorophyll <i>b</i> and light-harves…
AT1G44750	purine permease 11:Member of a family of proteins related to PUP1, a purine transporter. May be involved in the transport of purine and purine derivatives such as cytokinins, across the plasma membrane.
AT1G44835	YbaK/aminoacyl-tRNA synthetase-associated domain:
AT1G45688	unknown
AT1G46768	related to AP2 1:encodes a member of the DREB subfamily A-5 of ERF/AP2 transcription factor family (RAP2.1). The protein contains one AP2 domain. There are 16 members in this subfamily including RAP2.9 and RAP2.10.
AT1G47210	cyclin-dependent protein kinase 3;2:
AT1G47750	peroxin 11A:member of the peroxin11 (PEX11) gene family, integral to peroxisome membrane, controls peroxisome proliferation.
AT1G47870	winged-helix DNA-binding transcription factor family protein:Member of the E2F transcription factors, (cell cycle genes), key components of the cyclin D/retinoblastoma/E2F pathway. AtE2Fc is regulated by a balance between gene expression and ubiquitin-proteasome proteolysis. AtE2Fc might play a role in cell division and during the transition from skotomorphogenesis to photomorphogenesis. E2Fc has…
AT1G48010	Plant invertase/pectin methylesterase inhibitor superfamily protein:
AT1G48100	Pectin lyase-like superfamily protein:
AT1G48110	evolutionarily conserved C-terminal region 7:
AT1G48120	hydrolases;protein serine/threonine phosphatases:
AT1G48140	dolichol-phosphate mannosyltransferase-related:
AT1G48175	Cytidine/deoxycytidylate deaminase family protein:
AT1G48300	unknown
AT1G48310	chromatin remodeling factor18:
AT1G48410	Stabilizer of iron transporter SufD / Polynucleotidyl transferase:Encodes an RNA Slicer that selectively recruits microRNAs and siRNAs. There is currently no evidence that AGO1 Slicer is in a high molecular weight RNA-induced silencing complex (RISC). Mutants are defective in post-transcriptional gene silencing and have pleiotropic developmental and morphological defects. Through its action on th…
AT1G48420	D-cysteine desulfhydrase:Encodes an enzyme that decomposes D-cysteine into pyruvate, H2S, and NH3. Only D-cysteine but not L-cysteine was converted by D-CDes to pyruvate, H2S, and NH3. There is conflicting evidence on its 1-aminocyclopropane-1-carboxylate deaminase activity. Involved in regulating ethylene levels.
AT1G48430	Dihydroxyacetone kinase:
AT1G48440	B-cell receptor-associated 31-like:
AT1G48450	Protein of unknown function (DUF760):
AT1G48460	unknown
AT1G48490	Protein kinase superfamily protein:
AT1G48598	conserved peptide upstream open reading frame 31:Upstream open reading frames (uORFs) are small open reading frames found in the 5' UTR of a mature mRNA, and can potentially mediate translational regulation of the largest, or major, ORF (mORF). CPuORF31 represents a conserved upstream opening reading frame relative to major ORF AT1G48600.1
AT1G48600	S-adenosyl-L-methionine-dependent methyltransferases superfamily protein:Encodes a phosphoethanolamine N-methyltransferase that catalyses the last two methylation steps of the three sequential methylations of phosphoethanolamine (PEA) that are required for the synthesis of phosphocholine (PCho) in plants.
AT1G48620	high mobility group A5:This gene is predicted to encodes a histone H1/H5 family member. A plant line expressing an RNAi construct targeted against HON5 shows a reduced level of agrobacterium-mediated root transformation.
AT1G48630	receptor for activated C kinase 1B:Encodes a protein with similarity to mammalian RACKs. RACKs function to shuttle activated protein kinase C to different subcellular sites and may also function as a scaffold through physical interactions with other proteins. RACK1B has no phenotype on its own and probably acts redundantly with RACK1A and RACK1C.
AT1G48635	peroxin 3:
AT1G48790	associated molecule with the SH3 domain of STAM 1:
AT1G48830	Ribosomal protein S7e family protein:
AT1G48840	Plant protein of unknown function (DUF639):
AT1G48850	chorismate synthase, putative / 5-enolpyruvylshikimate-3-phosphate phospholyase, putative:
AT1G48900	Signal recognition particle, SRP54 subunit protein:
AT1G48920	nucleolin like 1:Encodes ATNUC-L1 (NUCLEOLIN LIKE 1), the predominant form of the two nucleolin proteins found in Arabidopsis. This protein is involved in rRNA processing, ribosome biosynthesis, and vascular pattern formation. PARL1 localizes to the nucleolus and parl1 mutants accumulate elevated levels of the unspliced 35S pre-rRNA. parl1 mutants also have defects in cotyledon, leaf, sepal, and …
AT1G49005	CLAVATA3/ESR-RELATED 11:Member of a large family of putative ligands homologous to the Clavata3 gene. Consists of a single exon. Can partially replace CLV3 function in vivo.
AT1G49010	Duplicated homeodomain-like superfamily protein:
AT1G49020	pre-tRNA:
AT1G49030	PLAC8 family protein:
AT1G49032	unknown
AT1G49180	protein kinase family protein:
AT1G49200	RING/U-box superfamily protein:
AT1G49400	Nucleic acid-binding, OB-fold-like protein:
AT1G49410	translocase of the outer mitochondrial membrane 6:
AT1G49450	Transducin/WD40 repeat-like superfamily protein:
AT1G49480	related to vernalization1 1:
AT1G49500	unknown
AT1G49510	embryo defective 1273:
AT1G49520	SWIB complex BAF60b domain-containing protein:
AT1G49600	RNA-binding protein 47A:
AT1G49610	F-box family protein:
AT1G49670	ARP protein (REF):molecular function has not been defined. Was shown involved in oxidative stress tolerance.
AT1G49680	unknown
AT1G49710	fucosyltransferase 12:Encodes a protein with core &alpha;1,3-fucosyltransferase activity.
AT1G49730	Protein kinase superfamily protein:
AT1G49740	PLC-like phosphodiesterases superfamily protein:
AT1G49760	poly(A) binding protein 8:polyadenylate-binding protein, putative / PABP, putative, similar to poly(A)-binding protein GB:AAF66825 GI:7673359 from (Nicotiana tabacum). Highly and ubiquitously expressed. Member of the class II PABP family.
AT1G49780	plant U-box 26:
AT1G49840	Protein of unknown function (DUF620):
AT1G49850	RING/U-box superfamily protein:
AT1G49950	telomere repeat binding factor 1:Encodes a telomeric DNA binding protein. In vitro, an N-terminal Myb domain enables it to interact with double-stranded telomeric repeats.
AT1G50000	methyltransferases:
AT1G50010	tubulin alpha-2 chain:Encodes alpha-2,4 tubulin. TUA2 and TUA4 encode identical proteins.
AT1G50040	Protein of unknown function (DUF1005):
AT1G50250	FTSH protease 1:encodes an FTSH protease that is localized to the chloroplast. Involved in the D1 repair cycle of Photosystem II. FtsH1 and FtsH5 are interchangeable in thylakoid membranes.
AT1G50290	unknown
AT1G50420	scarecrow-like 3:Encodes a scarecrow-like protein (SCL3) Putative transcription factors interacting with the gene product of VHA-B1 (vacuolar ATPase subunit B1; as shown through yeast two-hybrid assay).
AT1G50430	Ergosterol biosynthesis ERG4/ERG24 family:Mutants are defective in Brassinosteroid biosynthesis (delta7-sterol-C7 reduction step) and have a dwarf phenotype.
AT1G50440	RING/FYVE/PHD zinc finger superfamily protein:
AT1G50450	Saccharopine dehydrogenase :
AT1G50460	hexokinase-like 1:
AT1G50480	10-formyltetrahydrofolate synthetase:10-formyltetrahydrofolate synthetase (THFS) mRNA, complete
AT1G50640	ethylene responsive element binding factor 3:encodes a member of the ERF (ethylene response factor) subfamily B-1 of ERF/AP2 transcription factor family (ATERF-3). The protein contains one AP2 domain. There are 15 members in this subfamily including ATERF-3, ATERF-4, ATERF-7, and leafy petiole.
AT1G50659	other RNA
AT1G50660	unknown
AT1G50730	unknown
AT1G50740	Transmembrane proteins 14C:
AT1G50890	ARM repeat superfamily protein:
AT1G50900	Ankyrin repeat family protein:
AT1G50910	unknown
AT1G50920	Nucleolar GTP-binding protein:
AT1G51055	FBD-like domain family protein:
AT1G51060	histone H2A 10:Encodes HTA10, a histone H2A protein.
AT1G51070	basic helix-loop-helix (bHLH) DNA-binding superfamily protein:
AT1G51090	Heavy metal transport/detoxification superfamily protein :
AT1G51130	Nse4, component of Smc5/6 DNA repair complex:
AT1G51140	basic helix-loop-helix (bHLH) DNA-binding superfamily protein:
AT1G51170	Protein kinase superfamily protein:
AT1G51390	NFU domain protein 5:Encodes a protein containing the NFU domain that may be involved in iron-sulfur cluster assembly. Part of a five member gene family, more closely related to NFU4 than to NFU1,2, and 3. Targeted to the mitochondrion.
AT1G51400	Photosystem II 5 kD protein:
AT1G51402	unknown
AT1G51510	RNA-binding (RRM/RBD/RNP motifs) family protein:This gene is predicted to encode a protein involved in the exon junction complex. Though there is a predicted RNA binding motif, in the Drosophila ortholog (33% identity), this motif mediates interactions with Mago and is not available for RNA binding. The Arabidopsis Y14 protein appears to be predominantly nucleolar, but there is also some evidence…
AT1G51540	Galactose oxidase/kelch repeat superfamily protein:
AT1G51550	Kelch repeat-containing F-box family protein:
AT1G51560	Pyridoxamine 5'-phosphate oxidase family protein:
AT1G51570	Calcium-dependent lipid-binding (CaLB domain) plant phosphoribosyltransferase family protein:
AT1G51645	other RNA:Potential natural antisense gene, locus overlaps with AT1G51640
AT1G51660	mitogen-activated protein kinase kinase 4:Encodes a mitogen-activated map kinase kinase (there are nine in Arabidopsis) involved in innate immunity. This protein activates MPK3/MPK6 and early-defense genes redundantly with MKK5. In plants with both MKK5 and MKK6 levels reduced by RNAi plants, floral organs do not abscise suggestion a role for both proteins in mediating floral organ abscission.
AT1G51670	unknown
AT1G51690	protein phosphatase 2A 55 kDa regulatory subunit B alpha isoform:55 kDa B regulatory subunit of phosphatase 2A mRNA,
AT1G51700	DOF zinc finger protein 1:Encodes dof zinc finger protein (adof1).
AT1G51730	Ubiquitin-conjugating enzyme family protein:
AT1G51740	syntaxin of plants 81:member of SYP8 Gene Family
AT1G51805	Leucine-rich repeat protein kinase family protein:
AT1G51940	protein kinase family protein / peptidoglycan-binding LysM domain-containing protein:
AT1G52160	tRNAse Z3:Encodes a tRNase Z.
AT1G52170	pre-tRNA:
AT1G52220	unknown
AT1G52230	photosystem I subunit H2:
AT1G52240	RHO guanyl-nucleotide exchange factor 11:Encodes a member of KPP-like gene family, homolog of KPP (kinase partner protein) gene in tomato. Also a member of the RopGEF (guanine nucleotide exchange factor) family, containing the novel PRONE domain (plant-specific Rop nucleotide exchanger), which is exclusively active towards members of the Rop subfamily .
AT1G52300	Zinc-binding ribosomal protein family protein:
AT1G52340	NAD(P)-binding Rossmann-fold superfamily protein:Encodes a cytosolic short-chain dehydrogenase/reductase involved in the conversion of xanthoxin to ABA-aldehyde during ABA biosynthesis. Mutants are insensitive to sucrose and glucose.
AT1G52343	unknown
AT1G52347	other RNA:Unknown gene
AT1G52350	pre-tRNA:
AT1G52360	Coatomer, beta' subunit:
AT1G52615	:unknown gene
AT1G52618	unknown
AT1G52620	Pentatricopeptide repeat (PPR) superfamily protein:
AT1G52710	Rubredoxin-like superfamily protein:
AT1G52720	unknown
AT1G52760	lysophospholipase 2:Encodes a lysophospholipase 2 (LysoPL2). Involved in tolerance to cadmium-induced oxidative stress. Binds Acyl-CoA-binding protein 2 (ACBP2).
AT1G52770	Phototropic-responsive NPH3 family protein:
AT1G52780	Protein of unknown function (DUF2921):
AT1G52790	2-oxoglutarate (2OG) and Fe(II)-dependent oxygenase superfamily protein:encodes a putative oxidoreductase, 2OG-Fe(II) oxygenase family protein, similar to GS-AOP loci (GI:16118889, GI:16118887, GI:16118891, GI:16118893); contains PF03171 2OG-Fe(II) oxygenase superfamily domain
AT1G52800	2-oxoglutarate (2OG) and Fe(II)-dependent oxygenase superfamily protein:
AT1G52860	pre-tRNA:
AT1G52870	Peroxisomal membrane 22 kDa (Mpv17/PMP22) family protein:
AT1G52890	NAC domain containing protein 19:encodes a NAC transcription factor whose expression is induced by drought, high salt, and abscisic acid. This gene binds to ERD1 promoter in vitro.
AT1G52990	thioredoxin family protein:
AT1G53090	SPA1-related 4:Encodes a member of the SPA (suppressor of phyA-105) protein family (SPA1-SPA4). SPA proteins contain an N-terminal serine/threonine kinase-like motif followed by a coiled-coil structure and a C-terminal WD-repeat domain. SPA proteins function redundantly in suppressing photomorphogenesis in dark- and light-grown seedlings. SPA4 (and SPA3) predominantly regulates elongation growth …
AT1G53120	RNA-binding S4 domain-containing protein:
AT1G53170	ethylene response factor 8:encodes a member of the ERF (ethylene response factor) subfamily B-1 of ERF/AP2 transcription factor family (ATERF-8). The protein contains one AP2 domain. There are 15 members in this subfamily including ATERF-3, ATERF-4, ATERF-7, and leafy petiole.
AT1G53200	unknown
AT1G53210	sodium/calcium exchanger family protein / calcium-binding EF hand family protein:
AT1G53220	pre-tRNA:
AT1G53230	TEOSINTE BRANCHED 1, cycloidea and PCF transcription factor 3:Encodes a member of a recently identified plant transcription factor family that includes Teosinte branched 1, Cycloidea 1, and proliferating cell nuclear antigen (PCNA) factors, PCF1 and 2. Regulated by miR319. Involved in heterchronic regulation of leaf differentiation.
AT1G53233	other RNA:Potential natural antisense gene, locus overlaps with AT1G53230
AT1G53280	Class I glutamine amidotransferase-like superfamily protein:
AT1G53300	tetratricopetide-repeat thioredoxin-like 1:
AT1G53320	tubby like protein 7:Member of TLP family
AT1G53345	unknown
AT1G53350	Disease resistance protein (CC-NBS-LRR class) family:
AT1G53380	Plant protein of unknown function (DUF641):
AT1G53400	Ubiquitin domain-containing protein:
AT1G53460	unknown
AT1G53470	mechanosensitive channel of small conductance-like 4:
AT1G53480	mto 1 responding down 1:Encodes MRD1 (mto 1 responding down). Down-regulated in mto1-1 mutant that over-accumulates soluble methionine.
AT1G53490	RING/U-box superfamily protein:
AT1G53510	mitogen-activated protein kinase 18:member of MAP Kinase
AT1G53560	Ribosomal protein L18ae family:
AT1G53580	glyoxalase II 3:Mononuclear Fe(II)-containing member of the b-lactamase fold superfamily. ETHE1 is homodimeric in solution, exhibits low-level esterase activity, and specifically binds a single Fe(II) atom in the active site.
AT1G53645	hydroxyproline-rich glycoprotein family protein:
AT1G53750	regulatory particle triple-A 1A:26S proteasome AAA-ATPase subunit RPT1a (RPT1a) mRNA,
AT1G53830	pectin methylesterase 2:encodes a pectin methylesterase
AT1G53840	pectin methylesterase 1:encodes a pectin methylesterase
AT1G53850	20S proteasome alpha subunit E1:Encodes alpha5 subunit of 20s proteosome involved in protein degradation.
AT1G53880	Eukaryotic translation initiation factor 2B (eIF-2B) family protein:
AT1G53900	Eukaryotic translation initiation factor 2B (eIF-2B) family protein:
AT1G53910	related to AP2 12:encodes a member of the ERF (ethylene response factor) subfamily B-2 of ERF/AP2 transcription factor family (RAP2.12). The protein contains one AP2 domain. There are 5 members in this subfamily including RAP2.2 AND RAP2.12.
AT1G54100	aldehyde dehydrogenase 7B4:Aldehyde dehydrogenase
AT1G54110	Membrane fusion protein Use1:
AT1G54115	cation calcium exchanger 4:Involved in cation (Na and K) homeostasis.
AT1G54130	RELA/SPOT homolog 3:
AT1G54260	winged-helix DNA-binding transcription factor family protein:
AT1G54340	isocitrate dehydrogenase:NADP-specific isocitrate dehydrogenase (ICDH)
AT1G54350	ABC transporter family protein:
AT1G54355	other RNA:Potential natural antisense gene, locus overlaps with AT1G54350
AT1G54360	TBP-ASSOCIATED FACTOR 6B:Encodes one of two Arabidopsis proteins with significant similarity to the histone fold TBP-associated factor TAF6.
AT1G54510	NIMA-related serine/threonine kinase 1:Encodes AtNEK1, a member of the NIMA-related serine/threonine kinases (Neks) that have been linked to cell-cycle regulation in fungi and mammals. Plant Neks might be involved in plant development processes.
AT1G54520	unknown
AT1G54580	acyl carrier protein 2:encodes an acyl carrier protein expressed in leaves, roots, and dry seeds. Gene expression is not regulated by light but downregulated by starvation and upregulated by increased level of exogenous sucrose.
AT1G54670	pre-tRNA:
AT1G54680	unknown
AT1G54690	gamma histone variant H2AX:Encodes HTA3, a histone H2A protein. H2AX is a meiosis-specific isoform of histone H2A. Upon DSB formation, rapid accumulation of phosphorylated H2AX (&#947;-H2AX) occurs around the break site. H2AX foci accumulate in early G2. Immunolocalization studies in spread preparations of wild-type meiocytes at G2/early leptotene revealed the accumulation of numerous rather diff…
AT1G54700	unknown
AT1G54730	Major facilitator superfamily protein:
AT1G54740	Protein of unknown function (DUF3049):
AT1G54830	nuclear factor Y, subunit C3:
AT1G55120	beta-fructofuranosidase 5:Encodes a protein with fructan exohydrolase (FEH) activity acting on levan-type fructans (6-FEH, levanase). The enzyme does not have invertase activity.
AT1G55152	unknown
AT1G55160	unknown
AT1G55170	unknown
AT1G55180	phospholipase D alpha 4:member of C2-PLD. subfamily Represents a phospholipase D (PLD) gene with four exons, hence it is a member of the alpha class. Its amino acid sequence is quite different from other PLDs, therefore it might possess unique structural and/or catalytic properties.
AT1G55190	PRA1 (Prenylated rab acceptor) family protein:
AT1G55265	Protein of unknown function, DUF538:
AT1G55280	Lipase/lipooxygenase, PLAT/LH2 family protein:
AT1G55325	RNA polymerase II transcription mediators:Encodes the Arabidopsis homolog of the transcriptional regulator MED13, is dynamically expressed during embryogenesis and regulates both developmental timing and the radial pattern formation.
AT1G55330	arabinogalactan protein 21:Encodes a putative arabinogalactan-protein (AGP21).
AT1G55340	Protein of unknown function (DUF1639):
AT1G55350	calpain-type cysteine protease family:Similar to maize DEK1, a gene encoding a membrane protein of the calpain gene superfamily required for aleurone cell development in the endosperm of maize grains. A key component of the embryonic L1 cell-layer specification pathway.
AT1G55365	unknown
AT1G55370	NDH-dependent cyclic electron flow 5:
AT1G55450	S-adenosyl-L-methionine-dependent methyltransferases superfamily protein:
AT1G55460	DNA/RNA-binding protein Kin17, conserved region:
AT1G55490	chaperonin 60 beta:encodes the beta subunit of the chloroplast chaperonin 60, a homologue of bacterial GroEL. Mutants in this gene develops lesions on its leaves, expresses systemic acquired resistance (SAR) and develops accelerated cell death to heat shock stress. The protein has molecular chaperone activity for suppressing protein aggregation in vitro.
AT1G55500	evolutionarily conserved C-terminal region 4:
AT1G55520	TATA binding protein 2:TATA-box binding protein. Required for basal transcription. Acts facilitating the recruitment of TFIID to the promoter, which together with the RNA polymerase form the preinitiation complex.
AT1G55525	other RNA:Unknown gene
AT1G55530	RING/U-box superfamily protein:
AT1G55670	photosystem I subunit G:Encodes subunit G of photosystem I, an 11-kDa membrane protein that plays an important role in electron transport between plastocyanin and PSI and is involved in the stability of the PSI complex. PSI-G subunit is bound to PSI-B and is in contact with Lhca1. The protein inserts into thylakoids by a direct or "spontaneous" pathway that does not involve the activities of any …
AT1G55675	unknown
AT1G55770	Plant invertase/pectin methylesterase inhibitor superfamily protein:
AT1G55805	BolA-like family protein:
AT1G55810	uridine kinase-like 3:One of the homologous genes predicted to encode proteins with UPRT domains (Uracil phosphoribosyltransferase). Five of these genes (At5g40870, At3g27190, At1g55810, At4g26510 and At3g27440) show a high level of identity, and are annotated as also containing a N-terminal uracil kinase (UK) domain. These genes are referred to as UKL1 (UK-like 1), UKL2, UKL3, UKL4 and UKL5, res…
AT1G55910	zinc transporter 11 precursor:member of Putative zinc transporter ZIP2 - like family
AT1G55915	zinc ion binding:
AT1G55920	serine acetyltransferase 2;1:Encodes a chloroplast/cytosol localized serine O-acetyltransferase involved in sulfur assimilation and cysteine biosynthesis. Expressed in the vascular system.
AT1G55930	CBS domain-containing protein / transporter associated domain-containing protein:
AT1G55960	Polyketide cyclase/dehydrase and lipid transport superfamily protein:
AT1G55980	FAD/NAD(P)-binding oxidoreductase family protein:
AT1G55990	glycine-rich protein:
AT1G56000	FAD/NAD(P)-binding oxidoreductase family protein:
AT1G56070	Ribosomal protein S5/Elongation factor G/III/V family protein:encodes a translation elongation factor 2-like protein that is involved in cold-induced translation. Mutations in this gene specifically blocks low temperature-induced transcription of cold-responsive genes but induces the expression of CBF genes and mutants carrying the recessive mutations fail to acclimate to cold and is freezing sen…
AT1G56140	Leucine-rich repeat transmembrane protein kinase:
AT1G56145	Leucine-rich repeat transmembrane protein kinase:
AT1G56165	other RNA:Potential natural antisense gene, locus overlaps with AT1G56160
AT1G56170	nuclear factor Y, subunit C2:Encodes a protein with similarity to a subunit of the CCAAT promoter motif binding complex of yeast.One of two members of this class (HAP5B) and expressed in vegetative and reproductive tissues
AT1G56190	Phosphoglycerate kinase family protein:
AT1G56200	embryo defective 1303:
AT1G56210	Heavy metal transport/detoxification superfamily protein :
AT1G56220	Dormancy/auxin associated family protein:
AT1G56230	Protein of unknown function (DUF1399):
AT1G56233	Protein of unknown function (PD694200):Encodes a defensin-like (DEFL) family protein.
AT1G56280	drought-induced 19:Encodes a gene whose transcript level in root and leaves increases to progressive drought stress. The increase in transcript level is independent from abscisic acid level. Sequence is not similar to any protein of known function. It appears to be a member of plant-specific gene family. It's phosphorylated by AtCPK11 in a Ca(2+)-dependent manner at Thr105 and Ser107 within the A…
AT1G56290	CwfJ-like family protein:
AT1G56300	Chaperone DnaJ-domain superfamily protein:
AT1G56310	Polynucleotidyl transferase, ribonuclease H-like superfamily protein:
AT1G56330	secretion-associated RAS 1B:Encodes a small GTP-binding protein implicated in ER to cis-Golgi transport of other proteins. A member of ARF-like GTPase family. A thaliana has 21 members, in two subfamilies, ARF and ARF-like (ARL) GTPases. The protein is found associated to the ER and free in the cytosol.
AT1G56340	calreticulin 1a:Encodes one of three Arabidopsis calreticulins. In CRT-deficient mouse fibroblasts, this protein restores ER Ca2+ levels.
AT1G56345	Pseudouridine synthase family protein:
AT1G56350	Peptide chain release factor 2:
AT1G56500	haloacid dehalogenase-like hydrolase family protein:
AT1G56510	Disease resistance protein (TIR-NBS-LRR class):TIR-NB-LRR protein that confers resistance to four races of Albugo candida.
AT1G56520	Disease resistance protein (TIR-NBS-LRR class) family:
AT1G56530	hydroxyproline-rich glycoprotein family protein:
AT1G56540	Disease resistance protein (TIR-NBS-LRR class) family:
AT1G56590	Clathrin adaptor complexes medium subunit family protein:Involved in vesicle trafficking between the trans -Golgi network and vacuoles.
AT1G56600	galactinol synthase 2:
AT1G56660	unknown
AT1G57620	emp24/gp25L/p24 family/GOLD family protein:
AT1G57680	unknown
AT1G57720	Translation elongation factor EF1B, gamma chain:
AT1G57770	FAD/NAD(P)-binding oxidoreductase family protein:
AT1G57980	Nucleotide-sugar transporter family protein:
AT1G57990	purine permease 18:Member of a family of proteins related to PUP1, a purine transporter. May be involved in the transport of purine and purine derivatives such as cytokinins, across the plasma membrane.
AT1G58100	TCP family transcription factor :
AT1G58200	MSCS-like 3:A member of MscS-like gene family, structurally very similar to MSL2, comprising of an N-terminal chloroplast transit peptide, five trans-membrane helices and a C-terminal cytoplasmic domain. Mutant plants showed abnormalities in the size and shape of plastids. MSL3-GFP was localized to discrete foci on the plastid envelope and co-localize with the plastid division protein AtMinE. MSL…
AT1G58210	kinase interacting family protein:
AT1G58290	Glutamyl-tRNA reductase family protein:Encodes a protein with glutamyl-tRNA reductase (GluTR) activity, catalyzing the NADPH-dependent reduction of Glu-tRNA(Glu) to glutamate 1-semialdehyde (GSA) with the release of free tRNA(Glu). It is involved in the early steps of chlorophyll biosynthesis.
AT1G58440	FAD/NAD(P)-binding oxidoreductase family protein:Encodes a putative protein that has been speculated, based on sequence similarities, to have squalene monooxygenase activity.
AT1G58450	Tetratricopeptide repeat (TPR)-like superfamily protein:
AT1G58520	lipases;hydrolases, acting on ester bonds:
AT1G58602	LRR and NB-ARC domains-containing disease resistance protein:
AT1G58807	Disease resistance protein (CC-NBS-LRR class) family:
AT1G58848	Disease resistance protein (CC-NBS-LRR class) family:
AT1G59124	Disease resistance protein (CC-NBS-LRR class) family:
AT1G59218	Disease resistance protein (CC-NBS-LRR class) family:
AT1G59359	Ribosomal protein S5 family protein:
AT1G59560	E3 Ubiquitin ligase family protein:
AT1G59570	pre-tRNA:
AT1G59580	mitogen-activated protein kinase homolog 2:encodes a mitogen-activated kinase involved in innate immunity
AT1G59620	Disease resistance protein (CC-NBS-LRR class) family:Encodes CW9.
AT1G59640	BIG PETAL P:A basic helix-loop-helix encoding gene (BIGPETAL, BPE) involved in the control of petal size. BPE is expressed via two mRNAs derived from an alternative splicing event. The BPEub (AT1G59640.1)transcript is expressed ubiquitously, whereas the BPEp (AT1G59640.2) transcript is preferentially expressed in petals. Plants that lack the petal-expressed variant BPEp have larger petals as a re…
AT1G59865	unknown
AT1G59870	ABC-2 and Plant PDR ABC-type transporter family protein:ATP binding cassette transporter. Localized to the plasma membrane in uninfected cells. In infected leaves, the protein concentrated at infection sites. Contributes to nonhost resistance to inappropriate pathogens that enter by direct penetration in a salicylic acidÂ–dependent manner. Required for mlo resistance. Has Cd transporter activity …
AT1G59910	Actin-binding FH2 (formin homology 2) family protein:
AT1G60000	RNA-binding (RRM/RBD/RNP motifs) family protein:
AT1G60010	unknown
AT1G60070	Adaptor protein complex AP-1, gamma subunit:
AT1G60072	MIR859a; miRNA:Encodes a microRNA that targets several F-box family members. MicroRNAs are regulatory RNAs with a mature length of ~21-nucleotides that are processed from hairpin precursors by Dicer-like enzymes. MicroRNAs can negatively regulate gene expression by attenuating translation or by directing mRNA cleavage. Mature sequence: UCUCUCUGUUGUGAAGUCAAA
AT1G60073	MIR774a; miRNA:Encodes a microRNA that targets several F-box family members. MicroRNAs are regulatory RNAs with a mature length of ~21-nucleotides that are processed from hairpin precursors by Dicer-like enzymes. MicroRNAs can negatively regulate gene expression by attenuating translation or by directing mRNA cleavage. Mature sequence: UUGGUUACCCAUAUGGCCAUC
AT1G60190	ARM repeat superfamily protein:
AT1G60380	NAC (No Apical Meristem) domain transcriptional regulator superfamily protein:
AT1G60390	polygalacturonase 1:
AT1G60600	UbiA prenyltransferase family protein:Encodes a protein similar to 1,4-dihydroxy-2-naphthoic acid phytyltransferase involved in phylloquinone and plastoquinone biosynthesis. Mutants are pale green and heterotrophic with defects in photosynthetic electron transport.
AT1G60610	SBP (S-ribonuclease binding protein) family protein:
AT1G60620	RNA polymerase I subunit 43:
AT1G60660	cytochrome B5-like protein:member of Cytochromes b5
AT1G60670	Protein of unknown function (DUF3755):
AT1G60770	Tetratricopeptide repeat (TPR)-like superfamily protein:
AT1G60780	Clathrin adaptor complexes medium subunit family protein:
AT1G60840	pre-tRNA:
AT1G60989	SCR-like 7:Encodes a member of a family of small, secreted, cysteine rich proteins with sequence similarity to SCR (S locus cysteine-rich protein).
AT1G61010	cleavage and polyadenylation specificity factor 73-I:
AT1G61020	pre-tRNA:
AT1G61030	WAPL (Wings apart-like protein regulation of heterochromatin) protein:
AT1G61100	disease resistance protein (TIR class), putative:
AT1G61190	LRR and NB-ARC domains-containing disease resistance protein:
AT1G61200	homeobox-leucine zipper protein-related:
AT1G61210	Transducin/WD40 repeat-like superfamily protein:
AT1G61215	bromodomain 4:Bromodomain protein with a DNA binding motif
AT1G61270	Transmembrane amino acid transporter family protein:
AT1G61275	U12; snRNA:
AT1G61280	Phosphatidylinositol N-acetylglucosaminyltransferase, GPI19/PIG-P subunit:
AT1G61340	F-box family protein:
AT1G61380	S-domain-1 29:
AT1G61460	S-locus protein kinase, putative:
AT1G61470	Polynucleotidyl transferase, ribonuclease H-like superfamily protein:
AT1G61520	photosystem I light harvesting complex gene 3:PSI type III chlorophyll a/b-binding protein (Lhca3*1)
AT1G61540	Galactose oxidase/kelch repeat superfamily protein:
AT1G61640	Protein kinase superfamily protein:
AT1G61740	Sulfite exporter TauE/SafE family protein:
AT1G61780	postsynaptic protein-related:
AT1G61790	Oligosaccharyltransferase complex/magnesium transporter family protein:
AT1G62040	Ubiquitin-like superfamily protein:
AT1G62150	Mitochondrial transcription termination factor family protein:
AT1G62160	Serine protease inhibitor (SERPIN) family protein:
AT1G62170	Serine protease inhibitor (SERPIN) family protein:
AT1G62180	5'adenylylphosphosulfate reductase 2:encodes a adenosine 5'-phosphosulfate reductase, involved in sulfate assimilation. Is a major effect locus for natural variation of shoot sulfate content in Arabidopsis.
AT1G62181	unknown
AT1G62190	Kua-ubiquitin conjugating enzyme hybrid localisation domain:
AT1G62390	Octicosapeptide/Phox/Bem1p (PB1) domain-containing protein / tetratricopeptide repeat (TPR)-containing protein:
AT1G62420	Protein of unknown function (DUF506) :
AT1G62590	pentatricopeptide (PPR) repeat-containing protein:
AT1G62600	Flavin-binding monooxygenase family protein:
AT1G62630	Disease resistance protein (CC-NBS-LRR class) family:
AT1G62710	beta vacuolar processing enzyme:Encodes a vacuolar processing enzyme belonging to a novel group of cysteine proteases that is expressed specifically in seeds and is essential for the proper processing of storage proteins.
AT1G62720	Pentatricopeptide repeat (PPR-like) superfamily protein:
AT1G62730	Terpenoid synthases superfamily protein:
AT1G62740	stress-inducible protein, putative:
AT1G62810	Copper amine oxidase family protein:
AT1G62880	Cornichon family protein:
AT1G63080	Pentatricopeptide repeat (PPR) superfamily protein:Transacting siRNA generating locus. Is targeted by TAS2-derived ta-siR2140 for cleavage.
AT1G63090	phloem protein 2-A11:
AT1G63100	GRAS family transcription factor:
AT1G63130	Tetratricopeptide repeat (TPR)-like superfamily protein:Transacting siRNA generating locus. Its derived siR9as targets AT1G62930 for cleavage. Itself is targeted by TAS2-derived ta-siR2140 for cleavage.
AT1G63240	unknown
AT1G63250	DEA(D/H)-box RNA helicase family protein:
AT1G63260	tetraspanin10:Member of TETRASPANIN family
AT1G63290	Aldolase-type TIM barrel family protein:
AT1G63295	Remorin family protein
AT1G63350	Disease resistance protein (CC-NBS-LRR class) family:
AT1G63360	Disease resistance protein (CC-NBS-LRR class) family:
AT1G63390	FAD/NAD(P)-binding oxidoreductase family protein:
AT1G63400	Pentatricopeptide repeat (PPR) superfamily protein:
AT1G63420	Arabidopsis thaliana protein of unknown function (DUF821):
AT1G63430	Leucine-rich repeat protein kinase family protein:
AT1G63440	heavy metal atpase 5:The Arabidopsis P-type ATPase HMA5 is involved in Cu detoxification. hma5 mutant plants exhibit Cu hypersensitivity, which is especially dramatic in roots where HMA5 is mostly expressed.
AT1G63460	glutathione peroxidase 8:
AT1G63500	Protein kinase protein with tetratricopeptide repeat domain:
AT1G63510	pre-tRNA:
AT1G63520	Protein of unknown function (DUF3527):
AT1G63640	P-loop nucleoside triphosphate hydrolases superfamily protein with CH (Calponin Homology) domain:
AT1G63690	SIGNAL PEPTIDE PEPTIDASE-LIKE 2:
AT1G63720	unknown
AT1G63750	Disease resistance protein (TIR-NBS-LRR class) family:
AT1G63780	Ribosomal RNA processing Brix domain protein:Small nucleolar ribonucleoprotein protein involved in ribosomal RNA processing. Located in nucleolus and cajal bodies.
AT1G63790	pre-tRNA:
AT1G63800	ubiquitin-conjugating enzyme 5:
AT1G63810	unknown
AT1G63820	CCT motif family protein:
AT1G63830	PLAC8 family protein:
AT1G63850	BTB/POZ domain-containing protein:
AT1G63855	Putative methyltransferase family protein:
AT1G63860	Disease resistance protein (TIR-NBS-LRR class) family:
AT1G63870	Disease resistance protein (TIR-NBS-LRR class) family:
AT1G63880	Disease resistance protein (TIR-NBS-LRR class) family:Encodes a TIR-NBS-LRR class of disease resistance protein effective against Leptosphaeria maculans.
AT1G63900	E3 Ubiquitin ligase family protein:
AT1G64050	unknown
AT1G64065	Late embryogenesis abundant (LEA) hydroxyproline-rich glycoprotein family:
AT1G64090	Reticulan like protein B3:
AT1G64100	pentatricopeptide (PPR) repeat-containing protein:
AT1G64105	NAC domain containing protein 27:
AT1G64110	P-loop containing nucleoside triphosphate hydrolases superfamily protein:
AT1G64120	pre-tRNA:
AT1G64130	Polyketide cyclase/dehydrase and lipid transport superfamily protein:
AT1G64140	unknown
AT1G64142	conserved peptide upstream open reading frame 23:Upstream open reading frames (uORFs) are small open reading frames found in the 5' UTR of a mature mRNA, and can potentially mediate translational regulation of the largest, or major, ORF (mORF). CPuORF23 represents a conserved upstream opening reading frame relative to major ORF AT1G64140.1
AT1G64150	Uncharacterized protein family (UPF0016):
AT1G64220	translocase of outer membrane 7 kDa subunit 2:
AT1G64230	ubiquitin-conjugating enzyme 28:
AT1G64255	MuDR family transposase:
AT1G64280	regulatory protein (NPR1):This gene is a key regulator of the salicylic acid (SA)-mediated systemic acquired resistance (SAR) pathway. It is similar to the transcription factor inhibitor I kappa B, and contains ankyrin repeats. It confers resistance to the pathogens Pseudomonas syringae and Peronospora parasitica in a dosage-dependent fashion. Although transgenic Arabidopsis plants overexpressing…
AT1G64385	unknown
AT1G64470	Ubiquitin-like superfamily protein:
AT1G64500	Glutaredoxin family protein:
AT1G64550	general control non-repressible 3:member of GCN subfamily
AT1G64563	other RNA:
AT1G64570	Homeodomain-like superfamily protein:
AT1G64600	methyltransferases;copper ion binding:
AT1G64710	GroES-like zinc-binding dehydrogenase family protein:
AT1G64720	Polyketide cyclase/dehydrase and lipid transport superfamily protein:membrane related protein CP5
AT1G64740	alpha-1 tubulin:alpha-tubulin expressed primarily in stamens and mature pollen
AT1G64760	O-Glycosyl hydrolases family 17 protein:
AT1G64770	NDH-dependent cyclic electron flow 1:encodes a novel subunit of the chloroplast NAD(P)H dehydrogenase complex, involved in cyclic electron flow around photosystem I to produce ATP.
AT1G64850	Calcium-binding EF hand family protein:
AT1G64860	sigma factor A:Subunit of chloroplast RNA polymerase, confers the ability to recognize promoter sequences on the core enzyme
AT1G64990	GPCR-type G protein 1:Encodes a GPCR-type G protein receptor with nine predicted transmembrane domains. The protein binds abscisic acid (ABA) and is predicted to function as an ABA receptor. It has GTP-binding and GTPase activity and binds to ABA more effectively in the presence of GDP. GTG1 binds to GPA1, the alpha subunit of the heterotrimeric G protein. GPA1 (in its GTP-bound state) affects th…
AT1G65000	unknown
AT1G65280	DNAJ heat shock N-terminal domain-containing protein:
AT1G65290	mitochondrial acyl carrier protein 2:Encodes a member of the mitochondrial acyl carrier protein (ACP) family. As part of the mitochondrial matrix, it is likely to be involved in fatty acid or lipoic acid biogenesis.
AT1G65295	unknown
AT1G65420	Protein of unknown function (DUF565):Chloroplast localized YCF20-like gene involved in nonphotochemical quenching. Has overlapping functions with npq6.
AT1G65440	global transcription factor group B1:Related to yeast Spt6 protein, which functions as part of a protein complex in transcription initiation and also plays a role in chromatin structure / assembly.
AT1G65450	HXXXD-type acyl-transferase family protein:
AT1G65470	chromatin assembly factor-1 (FASCIATA1) (FAS1):Chromatin Assembly Factor-1 (CAF-1) p150 subunit. Mutants have reduced heterochromatin content. In Arabidopsis, the three CAF-1 subunits are encoded by FAS1, FAS2 and, most likely, MSI1, respectively. Mutations in FAS1 or FAS2 lead to increased frequency of homologous recombination and T-DNA integration in Arabidopsis.
AT1G65486	unknown
AT1G65490	unknown
AT1G65790	receptor kinase 1:An alternatively spliced gene that encodes a functional transmembrane receptor serine/threonine kinase, alternate form may not have transmembrane domain.
AT1G65800	receptor kinase 2:encodes a putative receptor-like serine/threonine protein kinases that is similar to brassica self-incompatibility (S) locus. expressed in specifically in cotyledons, leaves, and sepals, in correlation with the maturation of these structures.
AT1G65820	microsomal glutathione s-transferase, putative:
AT1G65830	pre-tRNA:
AT1G65840	polyamine oxidase 4:encodes a peroxisomal polyamine oxidase, involved in the back-conversion polyamine degradation pathway. Among the five polyamine oxidases in the Arabidopsis genome, PAO4 is the major isoform in root peroxisomes.
AT1G65860	flavin-monooxygenase glucosinolate S-oxygenase 1:belongs to the flavin-monooxygenase (FMO) family, encodes a glucosinolate S-oxygenase that catalyzes the conversion of methylthioalkyl glucosinolates to methylsulfinylalkyl glucosinolates
AT1G65870	Disease resistance-responsive (dirigent-like protein) family protein:
AT1G65930	cytosolic NADP+-dependent isocitrate dehydrogenase:Encodes a NADP+-isocitrate dehydrogenase that is believed to function in the cytosol. It appears to contribute to NADPH production under oxidative stress, and thereby to participate in redox signalling linked to defense responses.
AT1G65950	Protein kinase superfamily protein:
AT1G65960	glutamate decarboxylase 2:glutamate decarboxylase (GAD2)
AT1G66080	unknown
AT1G66090	Disease resistance protein (TIR-NBS class):
AT1G66150	transmembrane kinase 1:receptor-like transmembrane kinase I (TMK1)
AT1G66160	CYS, MET, PRO, and GLY protein 1:
AT1G66180	Eukaryotic aspartyl protease family protein:
AT1G66190	unknown
AT1G66260	RNA-binding (RRM/RBD/RNP motifs) family protein:
AT1G66360	Calcium-dependent lipid-binding (CaLB domain) family protein:
AT1G66400	calmodulin like 23:Encodes a calmodulin-like protein. Regulates nitric oxide levels and transition to flowering.
AT1G66430	pfkB-like carbohydrate kinase family protein:
AT1G66500	Pre-mRNA cleavage complex II:
AT1G66510	AAR2 protein family:
AT1G66580	senescence associated gene 24:
AT1G66590	cytochrome c oxidase 19-1:
AT1G66725	MIR163; miRNA:Encodes a microRNA that targets several SAMT family members. miR163, is highly expressed in A. thaliana diploids but down-regulated in A. thaliana autotetraploids and repressed in A. arenosa and A. suecica. MicroRNAs are regulatory RNAs with a mature length of ~21-nucleotides that are processed from hairpin precursors by Dicer-like enzymes. MicroRNAs can negatively regulate gene exp…
AT1G66730	DNA LIGASE 6:Encodes a novel plant specific DNA ligase that is involved in seed germination and DNA repair.
AT1G66880	Protein kinase superfamily protein:
AT1G66890	unknown
AT1G66910	Protein kinase superfamily protein:
AT1G66920	Protein kinase superfamily protein:
AT1G66940	protein kinase-related:
AT1G66970	SHV3-like 2:
AT1G66980	suppressor of npr1-1 constitutive 4:Encodes SNC4 (suppressor of npr1-1, constitutive 4), an atypical receptor-like kinase with two predicted extracellular glycerophosphoryl diester phosphodiesterase domains.
AT1G67080	abscisic acid (aba)-deficient 4:Encodes a protein involved in the photoprotection of PSII. An aba4-1 mutant completely lacks neoxanthin,a component of the chromophore of the peripheral antenna system in PSII. ABA4 is required for neoxanthin biosynthesis, an intermediary step in abscisic acid biosynthesis, but no catalytic activity has been detected for the ABA4 protein.
AT1G67090	ribulose bisphosphate carboxylase small chain 1A:
AT1G67310	Calmodulin-binding transcription activator protein with CG-1 and Ankyrin domains:
AT1G67370	DNA-binding HORMA family protein:meiotic asynaptic mutant 1 (ASY1). ASY1 protein is initially distributed as numerous foci throughout the chromatin. During early G2, the foci are juxtaposed to the nascent chromosome axes to form a continuous axis associated signal.
AT1G67390	F-box family protein:
AT1G67400	ELMO/CED-12 family protein:
AT1G67430	Ribosomal protein L22p/L17e family protein:
AT1G67460	Minichromosome maintenance (MCM2/3/5) family protein:
AT1G67470	Protein kinase superfamily protein:
AT1G67480	Galactose oxidase/kelch repeat superfamily protein:
AT1G67500	recovery protein 3:Encodes the catalytic subunit of DNA polymerase zeta.Mutants are sensitive to UV-B radiation. Gene is involved in damage-tolerance mechanisms through translesion synthesis(TLS).
AT1G67510	Leucine-rich repeat protein kinase family protein:
AT1G67560	PLAT/LH2 domain-containing lipoxygenase family protein:
AT1G67570	Protein of unknown function (DUF3537):
AT1G67660	Restriction endonuclease, type II-like superfamily protein:
AT1G67740	photosystem II BY:PsbY precursor (psbY) mRNA. This single nuclear gene is imported into the chloroplasts where it is processed into two integral membrane proteins with identical topology (PsbY-1 and PsbY-2). The protein appears to bind manganese but its role is not well understood.
AT1G67785	unknown
AT1G67792	other RNA:Potential natural antisense gene, locus overlaps with AT1G67790
AT1G67800	Copine (Calcium-dependent phospholipid-binding protein) family:
AT1G67830	alpha-fucosidase 1:Encodes a protein with &#945;-fucosidase activity. The activity was assessed on 2'-fucosyl-lactitol. AtFXG1 was able to remove the t-fucosyl residues of XXFG xyloglucan oligosaccharides.
AT1G67840	chloroplast sensor kinase:Encodes a chloroplast sensor kinase (CSK) that shares common ancestors with cyanobacterial histidine sensor kinases. CSK is synthesised in the cytosol and imported into the chloroplast as a protein precusor. CSK is autophosphorylated and required for control of transcription of chloroplast genes by the redox state of an electron carrier connecting photosystems I and II.
AT1G67850	Protein of unknown function (DUF707):
AT1G67855	unknown
AT1G67856	RING/U-box superfamily protein:
AT1G67865	unknown
AT1G67880	beta-1,4-N-acetylglucosaminyltransferase family protein:
AT1G67900	Phototropic-responsive NPH3 family protein:
AT1G67930	Golgi transport complex protein-related:
AT1G67940	non-intrinsic ABC protein 3:member of NAP subfamily
AT1G67960	unknown
AT1G68000	phosphatidylinositol synthase 1:phosphatidylinositol synthase 1
AT1G68010	hydroxypyruvate reductase:Encodes hydroxypyruvate reductase.
AT1G68020	UDP-Glycosyltransferase / trehalose-phosphatase family protein:Encodes an enzyme putatively involved in trehalose biosynthesis. The protein has a trehalose synthase (TPS)-like domain and a trehalose phosphatase (TPP)-like domain. It can complement a yeast mutant lacking both of these activities suggesting that this is a bifunctional enzyme.
AT1G68050	flavin-binding, kelch repeat, f box 1:Encodes FKF1, a flavin-binding kelch repeat F box protein, is clock-controlled, regulates transition to flowering. Forms a complex with GI on the CO promoter to regulate CO expression.
AT1G68140	Protein of unknown function (DUF1644):
AT1G68190	B-box zinc finger family protein:
AT1G68300	Adenine nucleotide alpha hydrolases-like superfamily protein:
AT1G68310	Protein of unknown function (DUF59):Encodes a protein that has been shown to specifically interact with a sequence motif, PIEPPPHH, in the cytoplasmic tail of a membrane protein that directs the protein from the ER to vacuoles where it is internalized.
AT1G68400	leucine-rich repeat transmembrane protein kinase family protein:
AT1G68440	unknown
AT1G68490	unknown
AT1G68510	LOB domain-containing protein 42:
AT1G68520	B-box type zinc finger protein with CCT domain:
AT1G68526	unknown protein
AT1G68550	Integrase-type DNA-binding superfamily protein:encodes a member of the ERF (ethylene response factor) subfamily B-6 of ERF/AP2 transcription factor family. The protein contains one AP2 domain. There are 12 members in this subfamily including RAP2.11.
AT1G68552	conserved peptide upstream open reading frame 53:Upstream open reading frames (uORFs) are small open reading frames found in the 5' UTR of a mature mRNA, and can potentially mediate translational regulation of the largest, or major, ORF (mORF). CPuORF53 represents a conserved upstream opening reading frame relative to major ORF AT1G68550.1
AT1G68560	alpha-xylosidase 1:Encodes a bifunctional alpha-l-arabinofuranosidase/beta-d-xylosidase that belongs to family 3 of glycoside hydrolases.
AT1G68580	agenet domain-containing protein / bromo-adjacent homology (BAH) domain-containing protein:
AT1G68585	unknown
AT1G68590	Ribosomal protein PSRP-3/Ycf65:
AT1G68600	Aluminium activated malate transporter family protein:
AT1G68620	alpha/beta-Hydrolases superfamily protein:
AT1G68660	Ribosomal protein L12/ ATP-dependent Clp protease adaptor protein ClpS family protein:
AT1G68670	myb-like transcription factor family protein:
AT1G68680	unknown
AT1G68720	tRNA arginine adenosine deaminase:Encodes the chloroplastic A-to-I tRNA editing enzyme.
AT1G68790	little nuclei3:
AT1G68820	Transmembrane Fragile-X-F-associated protein:
AT1G68830	STT7 homolog STN7:STN7 protein kinase; required for state transitions, phosphorylation of the major antenna complex (LHCII) between PSII and PSI, and light adaptation
AT1G68840	related to ABI3/VP1 2:Rav2 is part of a complex that has been named `regulator of the (H+)-ATPase of the vacuolar and endosomal membranes' (RAVE)
AT1G68845	unknown
AT1G68872	Unknown gene
AT1G68920	basic helix-loop-helix (bHLH) DNA-binding superfamily protein:
AT1G68990	male gametophyte defective 3:MGP3 (male gametophyte-defective 3) belongs to a small family of nuclear-encoded Phage type RNA polymerases (RPOTs) involved in the transcription of mitochondrial genes in Arabidopsis thaliana. Mutation in MGP 3 significantly retarded pollen tube growth and caused defective embryo development.
AT1G69000	pre-tRNA:
AT1G69010	BES1-interacting Myc-like protein 2:
AT1G69030	BSD domain-containing protein:
AT1G69070	unknown
AT1G69160	unknown
AT1G69252	unknown
AT1G69260	ABI five binding protein:
AT1G69270	receptor-like protein kinase 1:RPK1 is a leucine-rich receptor-like kinase located in the plasma membrane which is upregulated by abscisic acid, dehydration, high salt, low temperature, but not by other plant hormones. RPK1 knock-out and antisense plants show an ABA-insensitive phenotype. RPK1 plays a role in ABA-controlled cell proliferation and is a regulator of the ABA signal transduction path…
AT1G69290	Pentatricopeptide repeat (PPR) superfamily protein:
AT1G69295	plasmodesmata callose-binding protein 4:Encodes a member of the X8-GPI family of proteins. It localizes to the plasmodesmata and is predicted to bind callose.
AT1G69300	pre-tRNA:
AT1G69310	WRKY DNA-binding protein 57:member of WRKY Transcription Factor; Group II-c
AT1G69330	RING/U-box superfamily protein:
AT1G69340	appr-1-p processing enzyme family protein:
AT1G69380	Protein of unknown function (DUF155):
AT1G69390	homologue of bacterial MinE 1:Encodes an Arabidopsis homologue of the bacterial MinE topological specificity factor ensuring correct division site placement. It is an essential integral component of the plastid division machinery.
AT1G69410	eukaryotic elongation factor 5A-3:Encodes eIF5A-2, a putative eukaryotic translation initiation factor. There are three eIF5A coding genes in Arabidopsis: eIF5A-1/At1g13950, eIF5A-2/At1g26630 and eIF5A-3/At1g69410.
AT1G69430	unknown
AT1G69440	Argonaute family protein:Encodes ARGONAUTE7, a member of the ARGONAUTE family, characterised by the presence of PAZ and PIWI domains. Involved in the regulation of developmental timing. Required for the accumulation of TAS3 ta-siRNAs but not for accumulation of miR171, miR173, miR390 or mi391. Localized in mature rosette leaves and floral buds.
AT1G69460	emp24/gp25L/p24 family/GOLD family protein:
AT1G69470	unknown
AT1G69485	Ribosomal L32p protein family:
AT1G69490	NAC-like, activated by AP3/PI:Encodes a member of the NAC transcription factor gene family. It is expressed in floral primordia and upregulated by AP3 and PI. Its expression is associated with leaf senescence.
AT1G69500	cytochrome P450, family 704, subfamily B, polypeptide 1:Encodes a cytochrome P450, designated CYP704B1. Expressed in the developing anthers. Essential for pollen exine development. Mutations in CYP704B1 result in impaired pollen walls that lack a normal exine layer and exhibit a characteristic striped surface, termed zebra phenotype. Heterologous expression of CYP704B1 in yeast cells demonstrated…
AT1G69550	disease resistance protein (TIR-NBS-LRR class):
AT1G69570	Dof-type zinc finger DNA-binding family protein:
AT1G69620	ribosomal protein L34:putative 60S ribosomal protein L34
AT1G69640	sphingoid base hydroxylase 1:Encodes one of the two redundant sphingoid base hydroxylases (SBH). Involved in sphingolipid trihydroxy long-chain base (4-hydroxysphinganine) biosynthesis. Double mutants of SBHs were dwarfed and not able to progress from vegetative to reproductive growth.
AT1G69690	TCP family transcription factor :
AT1G69700	HVA22 homologue C:Part of the AtHVA22 family. Protein expression is ABA- and stress-inducible.
AT1G69730	Wall-associated kinase family protein:
AT1G69740	Aldolase superfamily protein:Encodes a putative 5-aminolevulinate dehydratase involved in chlorophyll biosynthesis.
AT1G69750	cytochrome c oxidase 19-2:
AT1G69760	unknown
AT1G69770	chromomethylase 3:Encodes a chromomethylase involved in methylating cytosine residues at non-CG sites. Involved in preferentially methylating transposon-related sequences, reducing their mobility. CMT3 interacts with an Arabidopsis homologue of HP1 (heterochromatin protein 1), which in turn interacts with methylated histones. Involved in gene silencing.
AT1G69830	alpha-amylase-like 3:Encodes a plastid-localized &#945;-amylase. Expression is reduced in the SEX4 mutant. Loss of function mutations show normal diurnal pattern of starch accumulation/degradation. Expression follows circadian rhythms.
AT1G69840	SPFH/Band 7/PHB domain-containing membrane-associated protein family:
AT1G69850	nitrate transporter 1:2:Encodes an inducible component of low-affinity nitrate uptake. mRNA found primarily in root hairs and the epidermis of roots.
AT1G69870	nitrate transporter 1.7:Encodes a low affinity nitrate transporter NRT1.7. Expressed in phloem. Responsible for source-to-sink remobilization of nitrate.
AT1G69890	Protein of unknown function (DUF569):
AT1G69900	Actin cross-linking protein:
AT1G69910	Protein kinase superfamily protein:
AT1G69935	short hypocotyl in white light1:Encodes a nuclear localized serine-arginine-aspartate-rich protein that acts as a negative regulator of photomorphogenesis.
AT1G69960	serine/threonine protein phosphatase 2A:type 2A serine/threonine protein phosphatase (PP2A) mRNA,
AT1G69980	unknown
AT1G70070	DEAD/DEAH box helicase, putative:Allelic to ISE2(increased size exclusion limit of plasmodesmata 2). Mutants maintain dilated plasmodesmata at the embryonic torpedo stage.
AT1G70090	glucosyl transferase family 8:Encodes a protein with putative galacturonosyltransferase activity.
AT1G70100	unknown
AT1G70150	zinc ion binding:
AT1G70160	unknown
AT1G70185	other RNA:
AT1G70190	Ribosomal protein L7/L12, oligomerisation;Ribosomal protein L7/L12, C-terminal/adaptor protein ClpS-like:
AT1G70200	RNA-binding (RRM/RBD/RNP motifs) family protein:
AT1G70209	unknown
AT1G70210	CYCLIN D1;1:Encodes a D-type cyclin that physically interacts with CDC2A. Its expression is upregulated early during germination.
AT1G70230	TRICHOME BIREFRINGENCE-LIKE 27:Encodes a member of the TBL (TRICHOME BIREFRINGENCE-LIKE) gene family containing a plant-specific DUF231 (domain of unknown function) domain. TBL gene family has 46 members, two of which (TBR/AT5G06700 and TBL3/AT5G01360) have been shown to be involved in the synthesis and deposition of secondary wall cellulose, presumably by influencing the esterification state of …
AT1G70250	receptor serine/threonine kinase, putative:Encodes a Protease inhibitor/seed storage/LTP family protein
AT1G70280	NHL domain-containing protein:
AT1G70290	trehalose-6-phosphatase synthase S8:Encodes an enzyme putatively involved in trehalose biosynthesis. Though the protein has both trehalose-6-phosphate synthase (TPS)-like and trehalose-6-phosphate phosphatase (TPP)-like domains, neither activity has been detected in enzymatic assays nor has the protein been able to complement yeast TPS or TPP mutants.
AT1G70310	spermidine synthase 2:Spermidine synthase.
AT1G70370	polygalacturonase 2:
AT1G70410	beta carbonic anhydrase 4:Encodes a putative beta-carbonic anhydrase betaCA4. Together with betaCA1 (At3g01500) regulates CO2-controlled stomatal movements in guard cells.
AT1G70420	Protein of unknown function (DUF1645):
AT1G70490	Ras-related small GTP-binding family protein:A member of ARF GTPase family. A thaliana has 21 members of this family, known to be essential for vesicle coating and uncoating and functions in GTP-binding. Gene encoding ADP-ribosylation factor and similar to other ARFs and ARF-like proteins. The gene is shown to play a role in cell division, cell expansion and cellulose production using antisense c…
AT1G70505	unknown
AT1G70520	cysteine-rich RLK (RECEPTOR-like protein kinase) 2:Encodes a cysteine-rich receptor-like protein kinase.
AT1G70530	cysteine-rich RLK (RECEPTOR-like protein kinase) 3:Encodes a cysteine-rich receptor-like protein kinase.
AT1G70540	Plant invertase/pectin methylesterase inhibitor superfamily protein:
AT1G70590	F-box family protein:
AT1G70600	Ribosomal protein L18e/L15 superfamily protein:
AT1G70610	transporter associated with antigen processing protein 1:member of TAP subfamily
AT1G70620	cyclin-related:
AT1G70640	octicosapeptide/Phox/Bem1p (PB1) domain-containing protein:
AT1G70650	Ran BP2/NZF zinc finger-like superfamily protein:
AT1G70660	MMS ZWEI homologue 2:MMZ2/UEV1B encodes a protein that may play a role in DNA damage responses and error-free post-replicative DNA repair by participating in lysine-63-based polyubiquitination reactions. UEV1A can form diubiquitin and triubiquitin chains in combination with UBC13A/UBC35 in vitro. It can also functionally complement an mms2 mutation in budding yeast, both by increasing mms2 mutant…
AT1G70700	TIFY domain/Divergent CCT motif family protein:JAZ9 is a protein presumed to be involved in jasmonate signaling. JAZ9 transcript levels rise in response to a jasmonate stimulus. JAZ9 can interact with the COI1 F-box subunit of an SCF E3 ubiquitin ligase in a yeast-two-hybrid assay only in the presence of jasmonate-isoleucine (JA-ILE) or coronatine. The Jas domain appears to be important for JAZ9-…
AT1G70710	glycosyl hydrolase 9B1:endo-1,4-beta-glucanase. Involved in cell elongation.
AT1G70730	Phosphoglucomutase/phosphomannomutase family protein:Encodes a cytosolic phosphoglucomutase (PGM). Two Arabidopsis PGM proteins (AT1G70730/PGM2 and AT1G23190/PGM3) have high sequence similarities and redundant functions. Mature plants possessing a single cPGM allele had a major reduction in cPGM activity. Whereas pgm2 and pgm3 single mutants are undistinguishable from the wild type, loss of both …
AT1G70760	inorganic carbon transport protein-related:a subunit of the chloroplast NAD(P)H dehydrogenase complex, involved in PSI cyclic electron transport. Located on the thylakoid membrane. Mutant has impaired NAD(P)H dehydrogenase activity.
AT1G70770	Protein of unknown function DUF2359, transmembrane:
AT1G70780	unknown
AT1G70782	conserved peptide upstream open reading frame 28:Upstream open reading frames (uORFs) are small open reading frames found in the 5' UTR of a mature mRNA, and can potentially mediate translational regulation of the largest, or major, ORF (mORF). CPuORF28 represents a conserved upstream opening reading frame relative to major ORF AT1G70780.1
AT1G70800	Calcium-dependent lipid-binding (CaLB domain) family protein:
AT1G70810	Calcium-dependent lipid-binding (CaLB domain) family protein:
AT1G70900	unknown
AT1G70944	unknown
AT1G71020	ARM repeat superfamily protein:
AT1G71030	MYB-like 2:Encodes a putative myb family transcription factor. In contrast to most other myb-like proteins its myb domain consists of a single repeat. A proline-rich region potentially involved in transactivation is found in the C-terminal part of the protein. Its transcript accumulates mainly in leaves.
AT1G71040	Cupredoxin superfamily protein:Encodes LPR2. Function together with LPR1 (AT1G23010) and a P5-type ATPase (At5g23630/PDR2) in a common pathway that adjusts root meristem activity to Pi (inorganic phosphate) availability.
AT1G71050	Heavy metal transport/detoxification superfamily protein :
AT1G71070	Core-2/I-branching beta-1,6-N-acetylglucosaminyltransferase family protein:
AT1G71080	RNA polymerase II transcription elongation factor:
AT1G71090	Auxin efflux carrier family protein:
AT1G71100	Ribose 5-phosphate isomerase, type A protein:Encodes a ribose 5-phosphate isomerase involved in the formation of uridine used for the synthesis of UDP-sugars. Mutants of this gene are affected in cellulose biosynthesis.
AT1G71340	PLC-like phosphodiesterases superfamily protein:
AT1G71350	eukaryotic translation initiation factor SUI1 family protein:
AT1G71370	DEA(D/H)-box RNA helicase family protein:
AT1G71440	tubulin folding cofactor E / Pfifferling (PFI):Encodes tubulin-folding cofactor E. Mutant embryos consist of one or a few grossly enlarged cells, surrounded by an endosperm that fails to cellularize and contains a few big nuclei.
AT1G71520	Integrase-type DNA-binding superfamily protein:encodes a member of the DREB subfamily A-5 of ERF/AP2 transcription factor family. The protein contains one AP2 domain. There are 16 members in this subfamily including RAP2.1, RAP2.9 and RAP2.10.
AT1G71528	other RNA:Potential natural antisense gene, locus overlaps with AT1G71530
AT1G71530	Protein kinase superfamily protein:
AT1G71697	choline kinase 1:Encodes choline kinase. mRNA levels are increased in response to wounding.
AT1G71720	Nucleic acid-binding proteins superfamily:
AT1G71770	poly(A)-binding protein 5:Encodes a Class I polyA-binding protein. Expressed in floral organs. Binds polyA sepharose in vitro.
AT1G71800	cleavage stimulating factor 64:RNA 3&#8242;-endÂ–processing factor of antisense FLC transcript. Mediates silencing of the floral repressor gene FLC.
AT1G71828	Potential natural antisense gene, locus overlaps with AT1G71830
AT1G71830	somatic embryogenesis receptor-like kinase 1:Plasma membrane LRR receptor-like serine threonine kinase expressed during embryogenesis in locules until stage 6 anthers, with higher expression in the tapetal cell layer. SERK1 and SERK2 receptor kinases function redundantly as an important control point for sporophytic development controlling male gametophyte production. later
AT1G71840	transducin family protein / WD-40 repeat family protein:
AT1G71850	Ubiquitin carboxyl-terminal hydrolase family protein:
AT1G71860	protein tyrosine phosphatase 1:Encodes a protein with tyrosine phosphatase activity that is downregulated in response to cold and upregulated in response to salt stress.
AT1G71920	HISTIDINE BIOSYNTHESIS 6B:Encodes a protein that is believed to act as a histidinol-phosphate transaminase involved in histidine biosynthesis. If the gene encoding the other protein shown to have this function, HISN6A (AT5G10330), is disrupted, a residual level of histidine biosynthesis continues, suggesting that HISN6B can somewhat compensate for the loss of HISN6A.
AT1G71940	SNARE associated Golgi protein family:
AT1G71950	Proteinase inhibitor, propeptide:
AT1G71960	ATP-binding casette family G25:Encodes a plasma membrane localized ABC transporter involved in abscisic acid transport and responses.
AT1G71970	unknown
AT1G71980	Protease-associated (PA) RING/U-box zinc finger family protein:
AT1G72010	TCP family transcription factor :
AT1G72020	unknown
AT1G72030	Acyl-CoA N-acyltransferases (NAT) superfamily protein:
AT1G72040	P-loop containing nucleoside triphosphate hydrolases superfamily protein:
AT1G72050	transcription factor IIIA:Encodes a transcriptional factor TFIIIA required for transcription of 5S rRNA gene. 5S rRNA is the smallest constituent of the ribosome. Work on one of the gene models AT1G72050.2 showed that it encodes a protein with nine Cys(2)-His(2)-type zinc fingers, a characteristic feature of TFIIIA proteins. AT1G72050.2 also contains a 23 amino acid spacer between fingers 1 and 2…
AT1G72100	late embryogenesis abundant domain-containing protein / LEA domain-containing protein:
AT1G72141	unknown
AT1G72150	PATELLIN 1:novel cell-plate-associated protein that is related in sequence to proteins involved in membrane trafficking in other eukaryotes
AT1G72160	Sec14p-like phosphatidylinositol transfer family protein:
AT1G72170	Domain of unknown function (DUF543):
AT1G72175	RING/U-box protein with domain of unknown function (DUF 1232):
AT1G72180	Leucine-rich receptor-like protein kinase family protein:
AT1G72270	unknown
AT1G72280	endoplasmic reticulum oxidoreductins 1:endoplasmic reticulum oxidoreductin
AT1G72290	Kunitz family trypsin and protease inhibitor protein:
AT1G72320	pumilio 23:Encodes a member of the Arabidopsis Pumilio (APUM) proteins containing PUF domain (eight repeats of approximately 36 amino acids each). PUF proteins regulate both mRNA stability and translation through sequence-specific binding to the 3' UTR of target mRNA transcripts.
AT1G72330	alanine aminotransferase 2:Encodes for alanine aminotransferase ALAAT2.
AT1G72360	Integrase-type DNA-binding superfamily protein:encodes a member of the ERF (ethylene response factor) subfamily B-2 of ERF/AP2 transcription factor family. The protein contains one AP2 domain. There are 5 members in this subfamily including RAP2.2 AND RAP2.12.
AT1G72370	40s ribosomal protein SA:acidic protein associated to 40S ribosomal subunit of ribosomes. Involved in polysome formation during active protein synthesis. Expressed in actively growing tissue.
AT1G72390	unknown
AT1G72416	Chaperone DnaJ-domain superfamily protein:
AT1G72420	NADH:ubiquinone oxidoreductase intermediate-associated protein 30:
AT1G72430	SAUR-like auxin-responsive protein family :
AT1G72440	CCAAT-binding factor:Encodes SLOW WALKER2 (SWA2), a NOC1/Mak21 homologue. Essential for coordinated cell cycle progression during female gametophyte development.
AT1G72450	jasmonate-zim-domain protein 6:JAZ6 transcript levels rise in response to a jasmonate stimulus and a GFP:JAZ6 fusion protein localizes to the nucleus. Application of jasmonate methyl ester to Arabidopsis roots reduces the levels of a JAZ6:GUS fusion protein, presumably by stimulating ubiquitin-proteasome-mediated degradation.
AT1G72460	Leucine-rich repeat protein kinase family protein:
AT1G72470	exocyst subunit exo70 family protein D1:A member of EXO70 gene family, putative exocyst subunits, conserved in land plants. Arabidopsis thaliana contains 23 putative EXO70 genes, which can be classified into eight clusters on the phylogenetic tree.
AT1G72480	Lung seven transmembrane receptor family protein:
AT1G72510	Protein of unknown function (DUF1677):
AT1G72530	plastid developmental protein DAG, putative:
AT1G72600	hydroxyproline-rich glycoprotein family protein:
AT1G72610	germin-like protein 1:germin-like protein (GLP1)
AT1G72620	alpha/beta-Hydrolases superfamily protein:
AT1G72630	ELF4-like 2:
AT1G72640	NAD(P)-binding Rossmann-fold superfamily protein:
AT1G72645	unknown
AT1G72650	TRF-like 6:Arabidopsis thaliana myb family transcription factor (At1g72650)
AT1G72680	cinnamyl-alcohol dehydrogenase:
AT1G72690	unknown
AT1G72710	casein kinase 1-like protein 2:Encodes a member of the casein kinase 1 protein family that is localized to the cytoplasm and nucleus.
AT1G72740	Homeodomain-like/winged-helix DNA-binding family protein:
AT1G72750	translocase inner membrane subunit 23-2:
AT1G72790	hydroxyproline-rich glycoprotein family protein:
AT1G72800	RNA-binding (RRM/RBD/RNP motifs) family protein:
AT1G72810	Pyridoxal-5'-phosphate-dependent enzyme family protein:
AT1G72820	Mitochondrial substrate carrier family protein:
AT1G72830	nuclear factor Y, subunit A3:Encodes a subunit of CCAAT-binding complex, binds to CCAAT box motif present in some plant promoter sequences. One of three members of this class (HAP2A, HAP2B, HAP2C), it is expressed in vegetative and reproductive tissues.
AT1G72900	Toll-Interleukin-Resistance (TIR) domain-containing protein:
AT1G72910	Toll-Interleukin-Resistance (TIR) domain-containing protein:
AT1G72920	Toll-Interleukin-Resistance (TIR) domain family protein:
AT1G72930	toll/interleukin-1 receptor-like:Toll/interleukin-1 receptor-like protein (TIR) mRNA,
AT1G72940	Toll-Interleukin-Resistance (TIR) domain-containing protein:
AT1G72950	Disease resistance protein (TIR-NBS class):
AT1G72990	beta-galactosidase 17:
AT1G73000	PYR1-like 3:Encodes a member of the PYR (pyrabactin resistance )/PYL(PYR1-like)/RCAR (regulatory components of ABA receptor) family proteins with 14 members. PYR/PYL/RCAR family proteins function as abscisic acid sensors. Mediate ABA-dependent regulation of protein phosphatase 2Cs ABI1 and ABI2.
AT1G73020	unknown
AT1G73030	SNF7 family protein:Encodes an ESCRT-related protein: CHMP1A/AT1G73030; CHMP1B/AT1G17730. CHMP1A and B mediate multivesicular body sorting of auxin carriers and are required for plant development. ESCRT: Endosomal Sorting Complexes Required For Transport machinery; CHMP: Charged Multivesicular Body Protein/Chromatin Modifying Protein.
AT1G73050	Glucose-methanol-choline (GMC) oxidoreductase family protein:
AT1G73060	Low PSII Accumulation 3:
AT1G73080	PEP1 receptor 1:Encodes a leucine-rich repeat receptor kinase. Functions as a receptor for AtPep1 to amplify innate immunity response to pathogen attacks.
AT1G73090	unknown
AT1G73120	unknown
AT1G73130	unknown
AT1G73150	global transcription factor group E3:Bromodomain and extra terminal domain family protein. Binds to acetyl-histone H3. Binding is reduced when GTE3 is SUMOylated by SIZ1.
AT1G73160	UDP-Glycosyltransferase superfamily protein:
AT1G73230	Nascent polypeptide-associated complex NAC:
AT1G73240	unknown
AT1G73390	Endosomal targeting BRO1-like domain-containing protein:
AT1G73480	alpha/beta-Hydrolases superfamily protein:
AT1G73490	RNA-binding (RRM/RBD/RNP motifs) family protein:
AT1G73530	RNA-binding (RRM/RBD/RNP motifs) family protein:
AT1G73540	nudix hydrolase homolog 21:
AT1G73655	FKBP-like peptidyl-prolyl cis-trans isomerase family protein:
AT1G73660	protein tyrosine kinase family protein:Encodes a protein with similarity to MAPKKKs. May function as a negative regulator of salt tolerance.
AT1G73670	MAP kinase 15:member of MAP Kinase
AT1G73680	alpha dioxygenase:Encodes an alpha dioxygenase. Recombinant protein catalyzes the conversion of a wide range of fatty acids into 2(R)-hydroperoxy derivatives.
AT1G73687	MIR159/MIR159A; miRNA:Encodes a microRNA that targets several MYB family members. MicroRNAs are regulatory RNAs with a mature length of ~21-nucleotides that are processed from hairpin precursors by Dicer-like enzymes. MicroRNAs can negatively regulate gene expression by attenuating translation or by directing mRNA cleavage.Mature sequence: UUUGGAUUGAAGGGAGCUCUA. Functions redundantly with MIR159B…
AT1G73690	cyclin-dependent kinase D1;1:cyclin dependent kinase activator CDKD;1. Nuclear localization. Involved in cell cycle regulation and cell differentiation.
AT1G73710	Pentatricopeptide repeat (PPR) superfamily protein:
AT1G73750	Uncharacterised conserved protein UCP031088, alpha/beta hydrolase:
AT1G73760	RING/U-box superfamily protein:
AT1G73770	unknown
AT1G73790	Protein of unknown function (DUF3743):
AT1G73805	Calmodulin binding protein-like:
AT1G73860	P-loop containing nucleoside triphosphate hydrolases superfamily protein:
AT1G73880	UDP-glucosyl transferase 89B1:
AT1G73885	unknown
AT1G73890	Bifunctional inhibitor/lipid-transfer protein/seed storage 2S albumin superfamily protein:
AT1G73900	pre-tRNA:
AT1G73910	actin-related proteins 4A:Encodes a gene similar to actin-related proteins in other organisms. Member of nuclear ARP family of genes. Component of chromatin remodeling complexes, involved in chromatin-mediated gene regulation.
AT1G73920	alpha/beta-Hydrolases superfamily protein:
AT1G73980	Phosphoribulokinase / Uridine kinase family:
AT1G73990	signal peptide peptidase:Encodes a putative protease SppA (SppA).
AT1G74050	Ribosomal protein L6 family protein:
AT1G74055	unknown
AT1G74060	Ribosomal protein L6 family protein:
AT1G74070	Cyclophilin-like peptidyl-prolyl cis-trans isomerase family protein:
AT1G74100	sulfotransferase 16:encodes a desulfoglucosinolate sulfotransferase, involved in the final step of glucosinolate core structure biosynthesis. Has a broad-substrate specificity with different desulfoglucosinolates, the best substrate is indole-3-methyl-dsGS, followed by benzyl-dsGS. Expression was induced by wounding, jasmonate and ethylene stimulates.
AT1G74270	Ribosomal protein L35Ae family protein:
AT1G74280	alpha/beta-Hydrolases superfamily protein:
AT1G74290	alpha/beta-Hydrolases superfamily protein:
AT1G74310	heat shock protein 101:Encodes ClpB1, which belongs to the Casein lytic proteinase/heat shock protein 100 (Clp/Hsp100) family. Involved in refolding of proteins which form aggregates under heat stress. Also known as AtHsp101. AtHsp101 is a cytosolic heat shock protein required for acclimation to high temperature.
AT1G74320	Protein kinase superfamily protein:encodes a choline kinase, whose expression is induced by high salt and mannitol.
AT1G74360	Leucine-rich repeat protein kinase family protein:
AT1G74370	RING/U-box superfamily protein:
AT1G74380	xyloglucan xylosyltransferase 5:
AT1G74440	Protein of unknown function (DUF962):
AT1G74448	unknown
AT1G74450	Protein of unknown function (DUF793):
AT1G74453	snoRNA:
AT1G74456	snoRNA:
AT1G74460	GDSL-like Lipase/Acylhydrolase superfamily protein:
AT1G74470	Pyridine nucleotide-disulphide oxidoreductase family protein:Encodes for a multifunctional protein with geranylgeranyl reductase activity shown to catalyze the reduction of prenylated geranylgeranyl-chlorophyll a to phytyl-chlorophyll a (chlorophyll a) and free geranylgeranyl pyrophosphate to phytyl pyrophosphate.
AT1G74510	Galactose oxidase/kelch repeat superfamily protein:
AT1G74560	NAP1-related protein 1:Double nrp1-1 nrp2-1 mutants show arrest of cell cycle progression at G2/M and disordered cellular organization occurred in root tips. Localize in the nucleus and can form homomeric and heteromeric protein complexes with NRP2. Bind histones Histone2A and Histone2B and associate with chromatin in vivo.
AT1G74580	Pentatricopeptide repeat (PPR) superfamily protein:
AT1G74690	IQ-domain 31:
AT1G74700	tRNAse Z1:Encodes a protein with RNAse Z activity suggesting a role in tRNA processing.
AT1G74730	Protein of unknown function (DUF1118):
AT1G74770	zinc ion binding:
AT1G74780	Nodulin-like / Major Facilitator Superfamily protein:
AT1G74840	Homeodomain-like superfamily protein:
AT1G74850	plastid transcriptionally active 2:Present in transcriptionally active plastid chromosomes. Involved in plastid gene expression.
AT1G74860	unknown
AT1G74870	RING/U-box superfamily protein:
AT1G74900	Pentatricopeptide repeat (PPR) superfamily protein:
AT1G74910	ADP-glucose pyrophosphorylase family protein:
AT1G74929	unknown
AT1G74930	Integrase-type DNA-binding superfamily protein:encodes a member of the DREB subfamily A-5 of ERF/AP2 transcription factor family. The protein contains one AP2 domain. There are 15 members in this subfamily including RAP2.1, RAP2.9 and RAP2.10.
AT1G74940	Protein of unknown function (DUF581):
AT1G74950	TIFY domain/Divergent CCT motif family protein:
AT1G74960	fatty acid biosynthesis 1:Encodes a plastidic beta-ketoacyl-ACP synthase II, involved in fatty acid elongation from 16:0-ACP to 18:0-ACP. Homozygous knock-out mutants are embryo lethal, indicating early embryo development is sensitive to elevated 16:0.
AT1G75010	GTP binding:Encodes ARC3 (Accumulation and Replication of Chloroplast 3), a chloroplast division factor functioning in the initiation of chloroplast division. ARC3 is a chimera of the prokaryotic FtsZ and part of the eukaryotic phosphatidylinositol-4-phosphate 5-kinase (PIP5K). Located on the outer surface of the chloroplast in a ring-like structure at the early stage of chloroplast division. The…
AT1G75020	lysophosphatidyl acyltransferase 4:
AT1G75060	unknown
AT1G75070	pre-tRNA:
AT1G75080	Brassinosteroid signalling positive regulator (BZR1) family protein:Encodes a positive regulator of the brassinosteroid (BR) signalling pathway that mediates both downstream BR responses and negative feedback regulation of BR biosynthesis. There is evidence for phosphorylation-dependent nucleocytoplasmic shuttling of BZR1. GSK3-like kinases (including BIN2), 14-3-3 proteins, and the phosphatase B…
AT1G75100	J-domain protein required for chloroplast accumulation response 1:Contains a J-domain at the C-terminus which is similar to the J-domain of auxilin, a clathrin-uncoating factor in cow, yeast and worm. Arabidopsis contains 6 other proteins similar to auxilin. Expressed in leaves and stems, but not in roots. Localized in the cytoplasm. Required for the chloroplast accumulation response, but not for…
AT1G75130	cytochrome P450, family 721, subfamily A, polypeptide 1:member of CYP721A
AT1G75170	Sec14p-like phosphatidylinositol transfer family protein:
AT1G75180	Erythronate-4-phosphate dehydrogenase family protein:
AT1G75190	unknown
AT1G75200	flavodoxin family protein / radical SAM domain-containing protein:
AT1G75210	HAD-superfamily hydrolase, subfamily IG, 5'-nucleotidase:
AT1G75220	Major facilitator superfamily protein:
AT1G75230	DNA glycosylase superfamily protein:
AT1G75270	dehydroascorbate reductase 2:
AT1G75280	NmrA-like negative transcriptional regulator family protein:isoflavone reductase, putative, identical to SP:P52577 Isoflavone reductase homolog P3 (EC 1.3.1.-) {Arabidopsis thaliana}; contains Pfam profile PF02716: isoflavone reductase. Involved in response to oxidative stress.
AT1G75295	other RNA:Potential natural antisense gene, locus overlaps with AT1G75290 and AT1G75300
AT1G75300	NmrA-like negative transcriptional regulator family protein:encodes a protein whose sequence is similar to an isoflavone reductase
AT1G75330	ornithine carbamoyltransferase:
AT1G75335	unknown
AT1G75340	Zinc finger C-x8-C-x5-C-x3-H type family protein:
AT1G75350	Ribosomal protein L31:
AT1G75360	unknown
AT1G75370	Sec14p-like phosphatidylinositol transfer family protein:
AT1G75380	bifunctional nuclease in basal defense response 1:Encodes a nucleases AtBBD1 involved in ABA-mediated callose deposition.
AT1G75420	UDP-Glycosyltransferase superfamily protein:
AT1G75440	ubiquitin-conjugating enzyme 16:
AT1G75450	cytokinin oxidase 5:This gene used to be called AtCKX6. It encodes a protein whose sequence is similar to cytokinin oxidase/dehydrogenase, which catalyzes the degradation of cytokinins.
AT1G75460	ATP-dependent protease La (LON) domain protein:
AT1G75490	Integrase-type DNA-binding superfamily protein:encodes a member of the DREB subfamily A-2 of ERF/AP2 transcription factor family. The protein contains one AP2 domain. There are eight members in this subfamily including DREB2A AND DREB2B that are involved in response to drought.
AT1G75500	Walls Are Thin 1:An Arabidopsis thaliana homolog of Medicago truncatula NODULIN21 (MtN21). The gene encodes a plant-specific, predicted integral membrane protein and is a member of the Plant-Drug/Metabolite Exporter (P-DME) family (Transporter Classification number: TC 2.A.7.3).
AT1G75510	Transcription initiation factor IIF, beta subunit:
AT1G75560	zinc knuckle (CCHC-type) family protein:
AT1G75570	pre-tRNA:
AT1G75590	SAUR-like auxin-responsive protein family :
AT1G75640	Leucine-rich receptor-like protein kinase family protein:
AT1G75650	pre-tRNA:
AT1G75660	5'-3' exoribonuclease 3:Encodes a protein with similarity to yeast 5'-3'exonucleases and can functionally complement the yeast mutations. In Arabidopsis XRN3 acts as a suppressor of posttranscriptional gene silencing. Mutants accumulate excised miRNA products suggesting that XRN3 is involved in degradation of these products.
AT1G75680	glycosyl hydrolase 9B7:
AT1G75690	DnaJ/Hsp40 cysteine-rich domain superfamily protein:
AT1G75700	HVA22-like protein G:
AT1G75710	C2H2-like zinc finger protein:
AT1G75730	unknown
AT1G75740	pre-tRNA:
AT1G75750	GAST1 protein homolog 1:GA-responsive GAST1 protein homolog regulated by BR and GA antagonistically. Possibly involved in cell elongation based on expression data
[truncated: 6,235 more rows]

## Sheet: B
Figure3-source data 1. HDA9 binds active genes
B. Genes showing HDA9 binding and upregulation in hda9
Accession	Annotation
AT1G02660	alpha/beta-Hydrolases superfamily protein:
AT1G02920	glutathione S-transferase 7:Encodes glutathione transferase belonging to the phi class of GSTs. Naming convention according to Wagner et al. (2002).
AT1G02930	glutathione S-transferase 6:Encodes glutathione transferase belonging to the phi class of GSTs. Naming convention according to Wagner et al. (2002).
AT1G02990	unknown
AT1G03080	kinase interacting (KIP1-like) family protein:
AT1G03220	Eukaryotic aspartyl protease family protein:
AT1G03850	Glutaredoxin family protein:
AT1G06670	nuclear DEIH-boxhelicase:nuclear DEIH-box helicase (NIH) encoding a putative RNA and/or DNA helicase homologous to a group of nucleic acid helicases from the DEAD/H family with nuclear DEIH-box helicase (NIH) distinct N- and C-terminal regions that differ from animal DEIH proteins
AT1G07630	pol-like 5:Encodes a protein phosphatase 2C like gene, similar to POL. Involved in leaf development. Knockout mutants have abnormally shaped leaves.
AT1G08830	copper/zinc superoxide dismutase 1:Encodes a cytosolic copper/zinc superoxide dismutase CSD1 that can detoxify superoxide radicals. Its expression is affected by miR398-directed mRNA cleavage. Regulated by biotic and abiotic stress.
AT1G10370	Glutathione S-transferase family protein:
AT1G10585	basic helix-loop-helix (bHLH) DNA-binding superfamily protein:
AT1G15010	unknown
AT1G15125	S-adenosyl-L-methionine-dependent methyltransferases superfamily protein:
AT1G15340	methyl-CPG-binding domain 10:Protein containing methyl-CpG-binding domain.Has sequence similarity to human MBD proteins.
AT1G15670	Galactose oxidase/kelch repeat superfamily protein:
AT1G16210	unknown
AT1G17360	unknown
AT1G19250	flavin-dependent monooxygenase 1:FMO1 is required for full expression of TIR-NB-LRRÂ–conditioned resistance to avirulent pathogens and for basal resistance to invasive virulent pathogens. Functions in an EDS1-regulated but SA-independent mechanism that promotes resistance and cell death at pathogen infection sites.
AT1G19485	Transducin/WD40 repeat-like superfamily protein:
AT1G20100	unknown
AT1G20630	catalase 1:Catalyzes the reduction of hydrogen peroxide using heme group as cofactor. Protects cells from toxicity by H2O2.
AT1G20960	U5 small nuclear ribonucleoprotein helicase, putative:
AT1G20970	unknown
AT1G21450	SCARECROW-like 1:Encodes a scarecrow-like protein (SCL1). Member of GRAS gene family.
AT1G21580	Zinc finger C-x8-C-x5-C-x3-H type family protein:
AT1G22900	Disease resistance-responsive (dirigent-like protein) family protein:
AT1G23550	similar to RCD one 2:Encodes a protein with similarity to RCD1 but without the WWE domain. The protein does have a PARP signature upstream of the C-terminal protein interaction domain. The PARP signature may bind NAD+ and attach the ADP-ribose-moiety from NAD+ to the target molecule. Its presence suggests a role for the protein in ADP ribosylation.
AT1G23870	trehalose-phosphatase/synthase 9:Encodes an enzyme putatively involved in trehalose biosynthesis. The protein has a trehalose synthase (TPS)-like domain that may or may not be active as well as a trehalose phosphatase (TPP)-like domain.
AT1G25540	phytochrome and flowering time regulatory protein (PFT1):Encodes a nuclear protein that acts in a phyB pathway (but downstream of phyB) and induces flowering in response to suboptimal light conditions. Mutants are hypo-responsive to far-red and hyper-responsive to red light and flower late under long day conditions. Also shown to be a Mediator subunit regulating jasmonate-dependent defense.
AT1G26930	Galactose oxidase/kelch repeat superfamily protein:
AT1G27430	GYF domain-containing protein:
AT1G27770	autoinhibited Ca2+-ATPase 1:Encodes a chloroplast envelope Ca2+-ATPase with an N-terminal autoinhibitor.
AT1G28060	Pre-mRNA-splicing factor 3:
AT1G32490	RNA helicase family protein:Encodes a homolog of the yeast PRP2 protein, one of four related DEAH RNA helicases identified as essential cofactors for RNA splicing.
AT1G32940	Subtilase family protein:
AT1G33560	Disease resistance protein (CC-NBS-LRR class) family:Encodes a NBS-LRR disease resistance protein that possesses N-terminal kinase subdomains. Activation tagged mutant of ADR1 showed elevated levels of SA and reactive oxygen species in addition to number of defense gene transcripts. Exhibits resistance to number of microbial pathogens.
AT1G33980	Smg-4/UPF3 family protein:Involved in mRNA surveillance, detects exported mRNAs with truncated open reading frames and initiates nonsense-mediated mRNA decay (NMD)
AT1G34180	NAC domain containing protein 16:
AT1G49840	Protein of unknown function (DUF620):
AT1G56660	unknown
AT1G63440	heavy metal atpase 5:The Arabidopsis P-type ATPase HMA5 is involved in Cu detoxification. hma5 mutant plants exhibit Cu hypersensitivity, which is especially dramatic in roots where HMA5 is mostly expressed.
AT1G64570	Homeodomain-like superfamily protein:
AT1G65440	global transcription factor group B1:Related to yeast Spt6 protein, which functions as part of a protein complex in transcription initiation and also plays a role in chromatin structure / assembly.
AT1G66400	calmodulin like 23:Encodes a calmodulin-like protein. Regulates nitric oxide levels and transition to flowering.
AT1G66920	Protein kinase superfamily protein:
AT1G68620	alpha/beta-Hydrolases superfamily protein:
AT1G68790	little nuclei3:
AT1G69490	NAP, ANAC029,NAC-like, activated by AP3/PI:Encodes a member of the NAC transcription factor gene family. It is expressed in floral primordia and upregulated by AP3 and PI. Its expression is associated with leaf senescence.
AT1G72390	unknown
AT1G75450	cytokinin oxidase 5:This gene used to be called AtCKX6. It encodes a protein whose sequence is similar to cytokinin oxidase/dehydrogenase, which catalyzes the degradation of cytokinins.
AT1G77760	nitrate reductase 1:Encodes the cytosolic minor isoform of nitrate reductase (NR). Involved in the first step of nitrate assimilation, it contributes about 15% of the nitrate reductase activity in shoots. Similar to molybdopterin oxidoreductases at the N-terminus, and to FAD/NAD-binding cytochrome reductases at the C-terminus. Cofactors: FAD, heme iron (cytochrome B-557), and molybdenum-pterin.
AT1G77770	Protein of unknown function (DUF1644):
AT1G77800	PHD finger family protein:
AT1G77890	DNA-directed RNA polymerase II protein:
AT1G79000	histone acetyltransferase of the CBP family 1:Homologous to CREB-binding protein, a co-activator of transcription with histone acetyl-transferase activity. No single prior lysine acetylation is sufficient to block HAC1 acetylation of the H3 or H4 peptides, suggesting that HAC1, HAC5, and HAC12 can acetylate any of several lysines present in the peptides. HAM2 acetylates histone H4 lysine 5. A pla…
AT1G80070	Pre-mRNA-processing-splicing factor:a genetic locus involved in embryogenesis. Mutations in this locus result in an abnormal suspensor and embryo lethality.
AT1G80450	VQ motif-containing protein:
AT1G80930	MIF4G domain-containing protein / MA3 domain-containing protein:
AT2G02710	PAS/LOV protein B:Encodes a putative blue light receptor protein.
AT2G03730	ACT domain repeat 5:Member of a small family of ACT domain containing proteins. ACT domains are thought to be involved in amino acid binding.
AT2G16660	Major facilitator superfamily protein:
AT2G23790	Protein of unknown function (DUF607):
AT2G26310	Chalcone-flavanone isomerase family protein:
AT2G27285	Coiled-coil domain-containing protein 55 (DUF2040):
AT2G29065	GRAS family transcription factor
AT2G29210	splicing factor PWI domain-containing protein:
AT2G30500	Kinase interacting (KIP1-like) family protein:
AT2G31260	autophagy 9 (APG9):Involved in autophagy, the process of vacuolar bulk degradation of cytoplasmic components. Mutant shows accelerated bolting and senescence.
AT2G31970	DNA repair-recombination protein (RAD50):Encodes the Arabidopsis RAD50 homologue. It is involved in double strand break repair. Component of the meiotic recombination complex that processes meiotic double-strand-breaks to produce single-stranded DNA ends, which act in the homology search and recombination. Accumulates in the nucleus during meiotic prophase, a process regulated by PHS1.
AT2G32190	unknown
AT2G32240	unknown
AT2G33480	NAC domain containing protein 41:
AT2G33490	hydroxyproline-rich glycoprotein family protein:
AT2G36080	AP2/B3-like transcriptional factor family protein:Encodes a plant-specific B3 DNA-binding domain transcription factor. Has transcription repressor activity.
AT2G36800	don-glucosyltransferase 1:Encodes a DON-Glucosyltransferase. The UGT73C5 glucosylates both brassinolide and castasterone in the 23-O position. The enzyme is presumably involved in the homeostasis of those steroid hormones hence regulating BR activity. Transgenic plants overexpressing UGT73C5 show a typical BR-deficient phenotype.
AT2G38410	ENTH/VHS/GAT family protein:
AT2G39660	botrytis-induced kinase1:Encodes a plasma membrane-localized ser/thr protein kinase that is a crucial component of host response signaling required to activate the resistance responses to Botrytis and A. brassicicola infection. It is likely a negative regulator of salicylic acid accumulation and basal defense against virulent bacterial pathogens.
AT2G40340	Integrase-type DNA-binding superfamily protein:Encodes a member of the DREB subfamily A-2 of ERF/AP2 transcription factor family. The protein contains one AP2 domain. There are eight members in this subfamily including DREB2A AND DREB2B that are involved in response to drought.
AT2G41250	Haloacid dehalogenase-like hydrolase (HAD) superfamily protein:
AT2G42010	phospholipase D beta 1:phospholipase D (PLDbeta)
AT2G42270	U5 small nuclear ribonucleoprotein helicase:
AT2G43120	RmlC-like cupins superfamily protein:
AT2G43510	trypsin inhibitor protein 1:Member of the defensin-like (DEFL) family. Encodes putative trypsin inhibitor protein which may function in defense against herbivory.
AT2G44200	CBF1-interacting co-repressor CIR, N-terminal;Pre-mRNA splicing factor:
AT2G45130	SPX domain gene 3:
AT2G45170	AUTOPHAGY 8E:Involved in autophagy. Under nutrient starvation the protein localizes to autophagosomes.
AT2G46020	transcription regulatory protein SNF2, putative:Encodes a SWI/SNF chromatin remodeling ATPase that upregulates transcription of all three CUC genes and is involved in the formation and/or maintenance of boundary cells during embryogenesis. Also mediates repression of expression of seed storage proteins in vegetative tissues. Interacts strongly with AtSWI3C, also with AtSWI3B, but not with AtSWI3A…
AT2G46040	ARID/BRIGHT DNA-binding domain;ELM2 domain protein:
AT2G48160	Tudor/PWWP/MBT domain-containing protein:
AT3G01160	unknown
AT3G01290	SPFH/Band 7/PHB domain-containing membrane-associated protein family:
AT3G01320	SIN3-like 1:Encodes SIN3-like 1, a homolog of the transcriptional repressor SIN3 (AT1G24190).
AT3G02140	AFP2 (ABI five-binding protein 2) family protein:Encodes a protein that acts in the nucleus and is an important negative regulator of ABA and salt stress responses, and could play a critical role in controlling root elongation, floral initiation and starch degradation.
AT3G02150	plastid transcription factor 1:a chloroplast trans-acting factor of the psbD light-responsive promoter.TCP gene involved in heterochronic control of leaf differentiation.
AT3G02170	longifolia2:Encodes LONGIFOLIA2 (LNG2). Regulates leaf morphology by promoting cell expansion in the leaf-length direction. The LNG2 homologue LNG1 (At5g15580) has similar function.
AT3G02400	SMAD/FHA domain-containing protein :
AT3G04720	pathogenesis-related 4:Encodes a protein similar to the antifungal chitin-binding protein hevein from rubber tree latex. mRNA levels increase in response to ethylene and turnip crinkle virus infection.
AT3G05670	RING/U-box protein:
AT3G06420	Ubiquitin-like superfamily protein:
AT3G06480	DEAD box RNA helicase family protein:
AT3G06670	binding:
AT3G08040	MATE efflux family protein:Encodes a member of the MATE (multidrug and toxin efflux family), expressed in roots but not shoots. Mutants accumulate excess iron, manganese and zinc, and express root Fe(III) chelatase activity even under iron sufficiency conditions. FRD3 is likely to function in root xylem loading of an iron chelator or other factor necessary for efficient iron uptake out of the xyl…
AT3G10490	NAC domain containing protein 52:
AT3G10500	NAC domain containing protein 53:
AT3G10640	SNF7 family protein:
AT3G11450	DnaJ domain ;Myb-like DNA-binding domain:
AT3G11780	MD-2-related lipid recognition domain-containing protein / ML domain-containing protein:
AT3G12020	P-loop containing nucleoside triphosphate hydrolases superfamily protein:
AT3G12830	SAUR-like auxin-responsive protein family :
AT3G13130	unknown
AT3G14050	RELA/SPOT homolog 2:
AT3G14060	unknown
AT3G14270	phosphatidylinositol-4-phosphate 5-kinase family protein:Encodes a protein that is predicted to act as a 1-phosphatidylinositol-3-phosphate (PtdIns3P) 5-kinase based on its homology to Fab1 from yeast. It contains an FYVE domain required for binding to PtdIns3P-containing membranes in yeast, as well as a Cpn60_TCP1 homology domain plus a kinase domain. fab1a/fab1b pollen grains not viable and hav…
AT3G14590	Calcium-dependent lipid-binding (CaLB domain) family protein:
AT3G14770	Nodulin MtN3 family protein:
AT3G14830	unknown
AT3G15120	P-loop containing nucleoside triphosphate hydrolases superfamily protein:
AT3G15356	Legume lectin family protein:
AT3G17690	cyclic nucleotide gated channel 19:member of Cyclic nucleotide gated channel family
AT3G18950	Transducin/WD40 repeat-like superfamily protein:
AT3G19150	KIP-related protein 6:Kip-related protein (KRP) gene, encodes CDK (cyclin-dependent kinase) inhibitor (CKI), negative regulator of cell division. Binds to D type cyclins. A member of seven KRP genes found in Arabidopsis thaliana. Differential expression patterns for distinct KRPs were revealed by in situ hybridization. KRP6 appears to be targeted for degradation by RHF1a and RHF2a to allow mitoti…
AT3G19190	autophagy 2:Encodes autophagy-related 2 (ATG2).
AT3G19510	Homeodomain-like protein with RING/FYVE/PHD-type zinc finger domain:Encodes a member of the PHD-finger homeodomain protein family. The HAT3.1 homeodomain is highly divergent in sequence even at positions that are almost invariable among homeodomains. HAT3.1 shows a preference for the sequence T(A/G)(A/C)ACCA, different from those bound by other homeodomains.
AT3G24870	Helicase/SANT-associated, DNA binding protein:
AT3G24880	Helicase/SANT-associated, DNA binding protein:
AT3G26440	Protein of unknown function (DUF707):
AT3G27190	uridine kinase-like 2:One of the homologous genes predicted to encode proteins with UPRT domains (Uracil phosphoribosyltransferase). Five of these genes (At5g40870, At3g27190, At1g55810, At4g26510 and At3g27440) show a high level of identity, and are annotated as also containing a N-terminal uracil kinase (UK) domain. These genes are referred to as UKL1 (UK-like 1), UKL2, UKL3, UKL4 and UKL5, res…
AT3G44690	unknown
AT3G45830	unknown
AT3G46930	Protein kinase superfamily protein:
AT3G47540	Chitinase family protein:
AT3G47780	ABC2 homolog 6:member of ATH subfamily
AT3G48050	BAH domain ;TFIIS helical bundle-like domain:
AT3G49590	Autophagy-related protein 13:
AT3G49601	unknown
AT3G50690	Leucine-rich repeat (LRR) family protein:
AT3G51890	Clathrin light chain protein:
AT3G54620	basic leucine zipper 25:bZIP transcription factor-like protein mRNA
AT3G54760	dentin sialophosphoprotein-related:
AT3G55060	unknown
AT3G58110	unknown
AT3G59100	glucan synthase-like 11:encodes a protein similar to callose synthase
AT3G60130	beta glucosidase 16:
AT3G60240	protein synthesis initiation factor 4G (EIF4G)
AT3G61890	homeobox 12:Encodes a homeodomain leucine zipper class I (HD-Zip I) protein. Loss of function mutant has abnormally shaped leaves and stems.
AT3G61960	Protein kinase superfamily protein:
AT3G62950	Thioredoxin superfamily protein:
AT3G63000	NPL4-like protein 1:
AT3G63070	Tudor/PWWP/MBT domain-containing protein:
AT4G01360	unknown
AT4G01720	WRKY family transcription factor:member of WRKY Transcription Factor 47; Group II-b
AT4G03430	pre-mRNA splicing factor-related:Encodes a nuclear protein similar to the human U5 small ribonucleoprotein-associated 102-kD protein and to the yeast pre-mRNA splicing factors Prp1p and Prp6p. STA1 expression is upregulated by cold stress, and the sta1-1 mutant is defective in the splicing of the cold-induced COR15A gene. Luciferase imaging was used to isolate a recessive mutant, sta1-1, with enh…
AT4G14350	AGC (cAMP-dependent, cGMP-dependent and protein kinase C) kinase family protein:
AT4G14370	Disease resistance protein (TIR-NBS-LRR class) family:
AT4G16630	DEA(D/H)-box RNA helicase family protein:
AT4G17080	Histone H3 K4-specific methyltransferase SET7/9 family protein:
AT4G17330	G2484-1 protein:gene of unknown function expressed in seedlings, flower buds and stems
AT4G17670	Protein of unknown function (DUF581):
AT4G18600	SCAR family protein:Encodes a member of the SCAR family.These proteins are part of a complex (WAVE) complex.The SCAR subunit activates the ARP2/3 complex which in turn act as a nucleator for actin filaments.
AT4G19430	unknown
AT4G19700	SBP (S-ribonuclease binding protein) family protein:
AT4G24740	FUS3-complementing gene 2:a LAMMER-type protein kinase that co-precipitates with serine/arginine-rich (SR) proteins in vitro, interaction modulated by phosphorylation of the proteins.
AT4G28080	Tetratricopeptide repeat (TPR)-like superfamily protein:
AT4G30430	tetraspanin9:Member of TETRASPANIN family
AT4G31570	unknown
AT4G31880	unknown
AT4G32350	Regulator of Vps4 activity in the MVB pathway protein:
AT4G32620	Enhancer of polycomb-like transcription factor protein:
AT4G33160	F-box family protein:
AT4G33940	RING/U-box superfamily protein:
AT4G35783	ROTUNDIFOLIA like 6:
AT4G35800	RNA polymerase II large subunit:Encodes the unique largest subunit of nuclear DNA-dependent RNA polymerase II; the ortholog of budding yeast RPB1 and a homolog of the E. coli RNA polymerase beta prime subunit.
AT4G36120	Plant protein of unknown function (DUF869):
AT4G36520	Chaperone DnaJ-domain superfamily protein:
AT4G37390	Auxin-responsive GH3 family protein:Encodes an IAA-amido synthase that conjugates Asp and other amino acids to auxin in vitro. Lines carrying insertions in this gene are hypersensitive to auxin. May function as a negative component in auxin signaling by regulating auxin activity.
AT4G37610	BTB and TAZ domain protein 5:BTB and TAZ domain protein. Located in cytoplasm and expressed in fruit, flower and leaves.
AT4G38600	HEAT repeat ;HECT-domain (ubiquitin-transferase):encodes a member of HECT ubiquitin protein ligase family that is involved in trichome cell morphogenesis. Mutants in this gene exhibit supernumerary trichome branches and increased DNA content.
AT4G38780	Pre-mRNA-processing-splicing factor:
AT4G39140	RING/U-box superfamily protein:
AT4G39420	unknown
AT5G04020	calmodulin binding:
AT5G04240	Zinc finger (C2H2 type) family protein / transcription factor jumonji (jmj) family protein:Early Flowering 6 (ELF6) encodes a Jumonji N/C and zinc finger domain-containing protein that acts as a repressor in the photoperiod pathway. ELF6 interacts with BES1 in a Y2H assay, in vitro, and in Arabidosis protoplasts (based on BiFC). ELF6 may play a role in brassinosteroid signaling by affecting histo…
AT5G04560	HhH-GPD base excision DNA repair family protein:Encodes a DNA glycosylase DEMETER (DME). Responsible for endosperm maternal-allele-specific hypomethylation at the MEDEA (MEA) gene. DME can excise 5-methylcytosine in vitro and when expressed in E. coli. DME establishes MEA imprinting by removing 5-methylcytosine to activate the maternal allele.
AT5G04720	ADR1-like 2:
AT5G05210	Surfeit locus protein 6:
AT5G06300	Putative lysine decarboxylase family protein:
AT5G06860	polygalacturonase inhibiting protein 1:Encodes a polygalacturonase inhibiting protein involved in defense response. PGIPs inhibit the function of cell wall pectin degrading enzymes such as those produced by fungal pathogens. PGIP1 is induced by fungal infection.
AT5G07290	MEI2-like 4:AML4 A member of mei2-like gene family, predominantly plant-based family of genes encoding RNA binding proteins with characteristic presence of a highly conserved RNA binding motif first described in the mei2 gene of the fission yeast S. pombe. In silico analyses reveal nine mei2 -like genes in A. thaliana. They were grouped into four distinct clades, based on overall sequence similar…
AT5G07990	Cytochrome P450 superfamily protein:Required for flavonoid 3' hydroxylase activity.
AT5G11950	Putative lysine decarboxylase family protein:Encodes a protein of unknown function. It has been crystallized and shown to be structurally almost identical to the protein encoded by At2G37210.
AT5G13820	telomeric DNA binding protein 1:Encodes a protein that specifically binds plant telomeric DNA repeats. It has a single Myb telomeric DNA-binding domain in C-terminus that prefers the sequence TTTAGGG.
AT5G16730	Plant protein of unknown function (DUF827):
AT5G17760	P-loop containing nucleoside triphosphate hydrolases superfamily protein:
AT5G19420	Regulator of chromosome condensation (RCC1) family with FYVE zinc finger domain:
AT5G20230	blue-copper-binding protein:Al-stress-induced gene
AT5G20490	Myosin family protein with Dil domain:Encodes a member of the type XI myosin protein family involved in root hair growth, trichome development, and organelle trafficking. This gene appears to be expressed at low levels throughout the plant.
AT5G22450	unknown
AT5G22460	alpha/beta-Hydrolases superfamily protein:
AT5G22760	PHD finger family protein:
AT5G24470	pseudo-response regulator 5:Encodes a pseudo-response regulator whose mutation affects various circadian-associated biological events such as flowering time in the long-day photoperiod conditions, red light sensitivity of seedlings during early photomorphogenesis, and the period of free-running rhythms of certain clock-controlled genes including CCA1 and APRR1/TOC1 in constant white light. Acts a…
AT5G24870	RING/U-box superfamily protein:
AT5G27030	TOPLESS-related 3:
AT5G39785	Protein of unknown function (DUF1666):
AT5G40340	Tudor/PWWP/MBT superfamily protein:
AT5G40450	unknown
AT5G41800	Transmembrane amino acid transporter family protein:
AT5G43130	TBP-associated factor 4:
AT5G46070	Guanylate-binding family protein:
AT5G50380	exocyst subunit exo70 family protein F1:A member of EXO70 gene family, putative exocyst subunits, conserved in land plants. Arabidopsis thaliana contains 23 putative EXO70 genes, which can be classified into eight clusters on the phylogenetic tree.
AT5G53440	unknown
AT5G55040	DNA-binding bromodomain-containing protein:
AT5G55670	RNA-binding (RRM/RBD/RNP motifs) family protein:
AT5G57655	xylose isomerase family protein:
AT5G58350	with no lysine (K) kinase 4:Encodes a member of the WNK family (9 members in all) of protein kinases, the structural design of which is clearly distinct from those of other known protein kinases, such as receptor-like kinases and mitogen-activated protein kinases. Its transcription is under the control of circadian rhythms.
AT5G58980	Neutral/alkaline non-lysosomal ceramidase:
AT5G63320	nuclear protein X1:Encodes NPX1 (Nuclear Protein X1), a nuclear factor regulating abscisic acid responses.
AT5G63610	cyclin-dependent kinase E;1:significant sequence similarity to plant and animal cyclin-dependent protein kinases, and was classified as an E-type CDK with a SPTAIRE cyclin binding motif in the kinase domain.
AT5G65110	acyl-CoA oxidase 2:Encodes an acyl-CoA oxidase presumably involved in long chain fatty acid biosynthesis.
AT5G65770	little nuclei4:
AT5G66640	DA1-related protein 3:
AT5G67480	BTB and TAZ domain protein 4:BTB and TAZ domain protein. Located in cytoplasm and expressed in fruit, flower and leaves.

## Sheet: C
Figure3-source data 1. HDA9 binds active genes
C. Chromatin related proteins showing HDA9 binding
Accession	Annotation
AT1G02740	MRG family protein:
AT1G03300	DOMAIN OF UNKNOWN FUNCTION 724 1:Member of the plant-specific DUF724 protein family. Arabidopsis has 10 DUF724 proteins. Loss of function mutant has a WT phenotype
AT1G04020	breast cancer associated RING 1:Encodes a protein containing two tandem BRCA1 C-Terminal (BRCT) domains, which function in phosphorylation-dependent proteinÂ–protein interactions.Loss of function mutations cause defects in meristem organization due to failure to repress WUS. BARD1 binds to WUS promoter and over expression of BARD reduces the extent of WUS expression.
AT1G05380	Acyl-CoA N-acyltransferase with RING/FYVE/PHD-type zinc finger protein:
AT1G11740	ankyrin repeat family protein:
AT1G14770	RING/FYVE/PHD zinc finger superfamily protein:
AT1G15440	periodic tryptophan protein 2:
AT1G15750	Transducin family protein / WD-40 repeat family protein:Encodes a protein with several WD40 repeats at the C-terminus and predicted protein-protein interaction domains at the N-terminus. Together with the TOPLESS-RELATED PROTEINS (TPRs), it is thought to be involved in transcriptional repression of root-promoting genes in the top help of the embryo during the transition stage of embryogenesis. Th…
AT1G18080	Transducin/WD40 repeat-like superfamily protein:Encodes the Arabidopsis thaliana homolog of the tobacco WD-40 repeat ArcA gene.
AT1G20670	DNA-binding bromodomain-containing protein:
AT1G20693	high mobility group B2:Encodes a protein belonging to the subgroup of HMGB (high mobility group B) proteins that have a distinctive DNA-binding motif, the HMG-box domain. The motif confers non-sequence specific interaction with linear DNA and structure-specific binding to distorted DNA sites. The HMGB proteins are involved in the assembly of nucleoprotein complexes. Can be phosphorylated by CK2al…
AT1G20696	high mobility group B3:Encodes a protein belonging to the subgroup of HMGB (high mobility group B) proteins that have a distinctive DNA-binding motif, the HMG-box domain. The motif confers non-sequence specific interaction with linear DNA and structure-specific binding to distorted DNA sites. The HMGB proteins are involved in the assembly of nucleoprotein complexes. Can be phosphorylated by CK2al…
AT1G20980	squamosa promoter binding protein-like 14:Encodes a nuclear plant-specific protein with features characteristic of a transcriptional regulator, including a nuclear localization signal sequence, a plant-specific DNA binding domain (the SBP box), and a protein interaction motif (ankyrin repeats). It unctions as a transcriptional regulator that plays a role not only in sensitivity to FB1, but also i…
AT1G26540	Agenet domain-containing protein:
AT1G27470	transducin family protein / WD-40 repeat family protein:
AT1G33420	RING/FYVE/PHD zinc finger superfamily protein:
AT1G52360	Coatomer, beta' subunit:
AT1G53090	SPA1-related 4:Encodes a member of the SPA (suppressor of phyA-105) protein family (SPA1-SPA4). SPA proteins contain an N-terminal serine/threonine kinase-like motif followed by a coiled-coil structure and a C-terminal WD-repeat domain. SPA proteins function redundantly in suppressing photomorphogenesis in dark- and light-grown seedlings. SPA4 (and SPA3) predominantly regulates elongation growth …
AT1G61215	bromodomain 4:Bromodomain protein with a DNA binding motif
AT1G64280	regulatory protein (NPR1):This gene is a key regulator of the salicylic acid (SA)-mediated systemic acquired resistance (SAR) pathway. It is similar to the transcription factor inhibitor I kappa B, and contains ankyrin repeats. It confers resistance to the pathogens Pseudomonas syringae and Peronospora parasitica in a dosage-dependent fashion. Although transgenic Arabidopsis plants overexpressing…
AT1G67310	Calmodulin-binding transcription activator protein with CG-1 and Ankyrin domains:
AT1G68580	agenet domain-containing protein / bromo-adjacent homology (BAH) domain-containing protein:
AT1G69770	chromomethylase 3:Encodes a chromomethylase involved in methylating cytosine residues at non-CG sites. Involved in preferentially methylating transposon-related sequences, reducing their mobility. CMT3 interacts with an Arabidopsis homologue of HP1 (heterochromatin protein 1), which in turn interacts with methylated histones. Involved in gene silencing.
AT1G71840	transducin family protein / WD-40 repeat family protein:
AT1G73150	global transcription factor group E3:Bromodomain and extra terminal domain family protein. Binds to acetyl-histone H3. Binding is reduced when GTE3 is SUMOylated by SIZ1.
AT1G76110	HMG (high mobility group) box protein with ARID/BRIGHT DNA-binding domain:
AT1G76380	DNA-binding bromodomain-containing protein:
AT1G77250	RING/FYVE/PHD-type zinc finger family protein:
AT1G77800	PHD finger family protein:
AT1G78070	Transducin/WD40 repeat-like superfamily protein:
AT1G79000	histone acetyltransferase of the CBP family 1:Homologous to CREB-binding protein, a co-activator of transcription with histone acetyl-transferase activity. No single prior lysine acetylation is sufficient to block HAC1 acetylation of the H3 or H4 peptides, suggesting that HAC1, HAC5, and HAC12 can acetylate any of several lysines present in the peptides. HAM2 acetylates histone H4 lysine 5. A pla…
AT1G79350	RING/FYVE/PHD zinc finger superfamily protein:
AT1G80670	Transducin/WD40 repeat-like superfamily protein:This gene is predicted to encode a protein with a DWD motif. It can bind to DDB1a in Y2H assays, and may be involved in the formation of a CUL4-based E3 ubiquitin ligase
AT2G01470	SEC12P-like 2 protein:Sec12p-like protein (GTP exchange protein) that functionally complements yeast sec12 null mutant. Protein is localized to the ER.
AT2G17560	high mobility group B4:Encodes a protein belonging to the subgroup of HMGB (high mobility group B) proteins that have a distinctive DNA-binding motif, the HMG-box domain. The motif confers non-sequence specific interaction with linear DNA and structure-specific binding to distorted DNA sites. The HMGB proteins are involved in the assembly of nucleoprotein complexes. Can be phosphorylated by CK2al…
AT2G18090	PHD finger family protein / SWIB complex BAF60b domain-containing protein / GYF domain-containing protein:
AT2G20330	Transducin/WD40 repeat-like superfamily protein:
AT2G22300	signal responsive 1:Encodes a putative CAM binding transcription factor. Loss of function mutations show enhanced resistance to fungal and bacterial pathogens suggesting that CAMTA functions to suppress defense responses.
AT2G24600	Ankyrin repeat family protein:
AT2G25420	transducin family protein / WD-40 repeat family protein:
AT2G28840	XB3 ortholog 1 in Arabidopsis thaliana:
AT2G31800	Integrin-linked protein kinase family:
AT2G31820	Ankyrin repeat family protein:
AT2G32950	Transducin/WD40 repeat-like superfamily protein:Represses photomorphogenesis and induces skotomorphogenesis in the dark. Contains a ring finger zinc-binding motif, a coiled-coil domain, and several WD-40 repeats, similar to G-beta proteins. The C-terminus has homology to TAFII80, a subunit of the TFIID component of the RNA polymerase II of Drosophila. Nuclear localization in the dark and cytoplas…
AT2G34900	Transcription factor GTE6:Encodes a member of the BET subgroup of bromodomain proteins, a novel class of putative transcription factors. Its expression is induced during seed imbibition and downregulated during germination. Seeds of a loss-of-function mutant allele, imb1, show impaired cotyledon greening during germination in abscisic acid (ABA) and express higher levels of ABI5 protein than the …
AT2G37520	Acyl-CoA N-acyltransferase with RING/FYVE/PHD-type zinc finger domain:
AT2G40050	Cysteine/Histidine-rich C1 domain family protein:
AT2G40140	zinc finger (CCCH-type) family protein:
AT2G41900	CCCH-type zinc finger protein with ARM repeat domain:
AT2G42150	DNA-binding bromodomain-containing protein:
AT2G44430	DNA-binding bromodomain-containing protein:
AT2G46020	transcription regulatory protein SNF2, putative:Encodes a SWI/SNF chromatin remodeling ATPase that upregulates transcription of all three CUC genes and is involved in the formation and/or maintenance of boundary cells during embryogenesis. Also mediates repression of expression of seed storage proteins in vegetative tissues. Interacts strongly with AtSWI3C, also with AtSWI3B, but not with AtSWI3A…
AT2G46280	TGF-beta receptor interacting protein 1:Encodes a homolog of mammalian TGF-beta receptor interacting protein. Co-immunoprecipitates with BRI1 and can be phosphorylated in vitro by BRI1 at specific sites (Thr-14, Thr-89, and either Thr-197 or Ser-198). May therefore be a cytoplasmic BRI1 substrate and involved in brassinosteroid regulated plant growth and development.The encoded protein has two DW…
AT2G46340	SPA (suppressor of phyA-105) protein family:Encodes a member of the SPA (suppressor of phyA-105) protein family (SPA1-SPA4). SPA proteins contain an N-terminal serine/threonine kinase-like motif followed by a coiled-coil structure and a C-terminal WD-repeat domain. SPA1 is a PHYA signaling intermediate, putative regulator of PHYA signaling pathway. Light responsive repressor of photomorphogenesis…
AT2G47230	DOMAIN OF UNKNOWN FUNCTION 724 6:Member of the plant-specific DUF724 protein family. Arabidopsis has 10 DUF724 proteins.
AT2G47410	WD40/YVTN repeat-like-containing domain;Bromodomain:
AT2G47450	chloroplast signal recognition particle component (CAO):A component of the chloroplast signal recognition particle pathway that is involved in LHCP targeting. It is downregulated in response to high light. It recognizes the DPLG motif in Lhcb1.
AT2G47790	Transducin/WD40 repeat-like superfamily protein:
AT2G48160	Tudor/PWWP/MBT domain-containing protein:
AT3G01340	Transducin/WD40 repeat-like superfamily protein:
AT3G01750	Ankyrin repeat family protein:
AT3G01770	bromodomain and extraterminal domain protein 10:
AT3G02890	RING/FYVE/PHD zinc finger superfamily protein:
AT3G05090	Transducin/WD40 repeat-like superfamily protein:Encodes a DCAF protein. Mutants are defective in lateral root development and suggest roles for DDB1Â­Cul4Â–mediated protein degradation in regulating auxin accumulation during lateral root primordium development and lateral root meristem emergence.
AT3G05430	Tudor/PWWP/MBT superfamily protein:
AT3G05670	RING/U-box protein:
AT3G06520	agenet domain-containing protein:
AT3G06880	Transducin/WD40 repeat-like superfamily protein:
AT3G07780	Protein of unknown function (DUF1423):Encodes a nuclear PHD finger protein that is functionally redundant with OBE2 and plays an important role in the maintenance and/or establishment of the root and shoot apical meristems.
AT3G08020	PHD finger family protein:
AT3G11200	alfin-like 2:AL2 encodes a member of the Alfin-Like family of nuclear-localized PhD domain containing homeodomain proteins. Binds to H3K4 di or trimethylated DNA.
AT3G12360	Ankyrin repeat family protein:Encodes a protein with an ankyrin motif and transmembrane domains that is involved in salt tolerance. Expressed throughout the plant and localized to the plasma membrane. Loss of function mutations show an increased tolerance to salt based on assaying seedling growth in the presence of salt. In the mutants, induction of genes required for production of reactive oxyge…
AT3G13340	Transducin/WD40 repeat-like superfamily protein:
AT3G15120	P-loop containing nucleoside triphosphate hydrolases superfamily protein:
AT3G15470	Transducin/WD40 repeat-like superfamily protein:
AT3G16650	Transducin/WD40 repeat-like superfamily protein:
AT3G16830	TOPLESS-related 2:
AT3G18060	transducin family protein / WD-40 repeat family protein:
AT3G18380	sequence-specific DNA binding transcription factors;sequence-specific DNA binding:
AT3G18950	Transducin/WD40 repeat-like superfamily protein:
AT3G19510	Homeodomain-like protein with RING/FYVE/PHD-type zinc finger domain:Encodes a member of the PHD-finger homeodomain protein family. The HAT3.1 homeodomain is highly divergent in sequence even at positions that are almost invariable among homeodomains. HAT3.1 shows a preference for the sequence T(A/G)(A/C)ACCA, different from those bound by other homeodomains.
AT3G19590	Transducin/WD40 repeat-like superfamily protein:Encodes a protein that may have a role in the spindle assembly checkpoint.
AT3G26640	Transducin/WD40 repeat-like superfamily protein:
AT3G27860	Tudor/PWWP/MBT superfamily protein:
AT3G48050	BAH domain ;TFIIS helical bundle-like domain:
AT3G49400	Transducin/WD40 repeat-like superfamily protein:
AT3G49660	Transducin/WD40 repeat-like superfamily protein:
AT3G51880	high mobility group B1:Encodes a protein belonging to the subgroup of HMGB (high mobility group B) proteins that have a distinctive DNA-binding motif, the HMG-box domain. The motif confers non-sequence specific interaction with linear DNA and structure-specific binding to distorted DNA sites. The HMGB proteins are involved in the assembly of nucleoprotein complexes. Can be phosphorylated by CK2al…
AT3G52100	RING/FYVE/PHD-type zinc finger family protein:
AT3G52190	phosphate transporter traffic facilitator1:Encodes a plant specific protein structurally related to the SEC12 proteins of the early secretory pathway. Mutation of PHF1 impairs Pi transport. Expression was detected in all tissues, and was induced by Pi starvation. Localized in endoplasmic reticulum (ER), and mutation of PHF1 resulted in ER retention and reduced accumulation of the plasma membrane …
AT3G54460	SNF2 domain-containing protein / helicase domain-containing protein / F-box family protein:
AT3G55980	salt-inducible zinc finger 1:
AT3G60110	DNA-binding bromodomain-containing protein:
AT3G61740	SET domain protein 14:
AT3G63030	methyl-CPG-binding domain 4:Protein containing methyl-CpG-binding domain.Has sequence similarity to human MBD proteins.
AT3G63070	Tudor/PWWP/MBT domain-containing protein:
AT3G63460	transducin family protein / WD-40 repeat family protein:
AT4G01860	Transducin family protein / WD-40 repeat family protein:
AT4G01930	Cysteine/Histidine-rich C1 domain family protein:
AT4G02540	Cysteine/Histidine-rich C1 domain family protein:
AT4G05040	ankyrin repeat family protein:
AT4G11270	Transducin/WD40 repeat-like superfamily protein:
AT4G11560	bromo-adjacent homology (BAH) domain-containing protein:
AT4G11920	cell cycle switch protein 52 A2:Encodes a putative activator of the anaphase-promoting complex/cyclosome. Promotes exit from the cell cycle and entry into the endocycle leading to endoreduplication.
AT4G17330	G2484-1 protein:gene of unknown function expressed in seedlings, flower buds and stems
AT4G19660	NPR1-like protein 4:Encodes a ankyrin repeat BTB/POZ domain-containing protein with 36% sequence identity with NPR1. Mutants are more susceptible to the bacterial pathogen Pseudomonas syringe pv. tomato DC3000 and to the fungal pathogen Erysiphe cichoracearum, but do not differ markedly from wild type in interaction with virulent and avirulent strains of the oomycete Peronospora parasitica. NPR4 …
AT4G22910	FIZZY-related 2:
AT4G23860	PHD finger protein-related:
AT4G26120	Ankyrin repeat family protein / BTB/POZ domain-containing protein:
AT4G29790	:
AT4G29830	Transducin/WD40 repeat-like superfamily protein:The protein is composed of repeats of WD motif which is involved in protein complex formation. The gene is involved in flower timing and flower development. This gene is predicted to encode a protein with a DWD motif. It can bind to DDB1a in Y2H assays, and DDB1b in co-IP assays, and may be involved in the formation of a CUL4-based E3 ubiquitin liga…
AT4G29940	pathogenesis related homeodomain protein A:Homeodomain protein (PRHA). Expression of the gene differs in various vegetative and floral plant tissues and is positively influenced by the phytohormone auxin. It is often associated with regions of developing vascular tissue. The prha promoter is highly responsive to the synthetic auxin, naphthalene acetic acid, in transient assays using tobacco proto…
AT4G32010	HSI2-like 1:
AT4G32440	Plant Tudor-like RNA-binding protein:
AT4G32551	LisH dimerisation motif;WD40/YVTN repeat-like-containing domain:LEUNIG regulates floral organ identity,gynoecium and ovule development. Negatively regulates AGAMOUS . Encodes a glutamine-rich protein with seven WD repeats similar to transcriptional corepressors.
AT4G32620	Enhancer of polycomb-like transcription factor protein:
AT4G34280	transducin family protein / WD-40 repeat family protein:
AT4G34460	GTP binding protein beta 1:Encodes the heterotrimeric G-protein beta subunit and is involved in organ shape. A significant fraction of the protein is found in the ER. Mutants carrying null alleles express similar fruit phenotypes, as seen in er plants, but differ from er in that the stem is only slightly shorter than that in the wild type, the pedicel is slightly longer than that in the wild type…
AT4G35140	Transducin/WD40 repeat-like superfamily protein:
AT4G37280	MRG family protein:
AT4G38480	Transducin/WD40 repeat-like superfamily protein:
AT4G39100	PHD finger family protein / bromo-adjacent homology (BAH) domain-containing protein:Putative transcription factor containing a PHD finger and BAH motif, required for normal development
AT5G02620	ankyrin-like1:Encodes a member of the ankyrin repeat protein. Localized in the endoplasmic reticulum.
AT5G02950	Tudor/PWWP/MBT superfamily protein:
AT5G05610	alfin-like 1:AL1 encodes a member of the Alfin-Like family of nuclear-localized PhD domain containing homeodomain proteins. Binds to H3K4 di or trimethylated DNA.
AT5G06780	Emsy N Terminus (ENT)/ plant Tudor-like domains-containing protein:
AT5G07270	XB3 ortholog 3 in Arabidopsis thaliana:
AT5G07350	TUDOR-SN protein 1:RNA binding protein with nuclease activity essential for stress response. Involved in mechanisms acting on mRNAs entering the secretory pathway. Functionally redundant with TSN2.
AT5G09410	ethylene induced calmodulin binding protein:calmodulin-binding protein, similar to another ethylene-upregulated calmodulin-binding protein ER1 GI:11612392 from (Nicotiana tabacum)
AT5G10550	global transcription factor group E2:This gene is predicted to encode a bromodomain-containing protein. A plant line expressing RNAi constructs targeted against GTE7 shows some resistance to agrobacterium-mediated root transformation.
AT5G11470	bromo-adjacent homology (BAH) domain-containing protein:
AT5G12850	CCCH-type zinc finger protein with ARM repeat domain:
AT5G13020	Emsy N Terminus (ENT)/ plant Tudor-like domains-containing protein:
AT5G13840	FIZZY-related 3:
AT5G14050	Transducin/WD40 repeat-like superfamily protein:
AT5G14270	bromodomain and extraterminal domain protein 9:
AT5G15500	Ankyrin repeat family protein:
AT5G16750	Transducin family protein / WD-40 repeat family protein:Encodes a nucleolar localized WD-40 repeat protein that is preferentially expressed in dividing cells and is required for regulated division planes and embryo development.
AT5G20350	Ankyrin repeat family protein with DHHC zinc finger domain:Encodes a protein containing ankyrin and DHHC-CRD domain. Acts to restrict the size of the swelling that forms at the beginning of root hair cell growth, possibly by a mechanism that requires RHD1. Mutant displays defects in both root hair and pollen tube growth.
AT5G21040	F-box protein 2:Encodes an F-box containing protein that interacts physically with BHLH32 and appears to be involved in mediating phosphate starvation responses.
AT5G22750	DNA/RNA helicase protein:DNA repair gene. gamma-radiation hypersensitive (RAD5) involved in stable transformation and T-DNA transfer
AT5G22760	PHD finger family protein:
AT5G24520	Transducin/WD40 repeat-like superfamily protein:Required for the accumulation of purple anthocyanins in leaves and stems. Involved in trichome and root hair development. Controls epidermal cell fate specification. Affects dihydroflavonol 4-reductase gene expression. It is thought that a ternary complex composed of TT2, TT8 and TTG1 is necessary for correct expression of BAN in seed endothelium. B…
AT5G25150	TBP-associated factor 5:Encodes a putative TATA-binding-protein associated factor TAF5. TAFs are subunits of the general transcription factor IID (TFIID).
AT5G27030	TOPLESS-related 3:
AT5G27650	Tudor/PWWP/MBT superfamily protein:
AT5G40340	Tudor/PWWP/MBT superfamily protein:
AT5G40880	WD-40 repeat family protein / zfwd3 protein (ZFWD3):
AT5G45760	Transducin/WD40 repeat-like superfamily protein:
AT5G51980	Transducin/WD40 repeat-like superfamily protein:
AT5G52070	Agenet domain-containing protein:
AT5G52820	WD-40 repeat family protein / notchless protein, putative:
AT5G53470	acyl-CoA binding protein 1:Encodes an acyl-CoA binding protein that is localized to vesicles,and plasma membrane especially in epidermal cells of heart, torpedo and cotyledon stage embryos, cell wall of the seed coat. Northern blot analysis showed that the 1.4 kb ACBP1 mRNA was expressed in silique, root, stem, leaf and flower.
AT5G53500	Transducin/WD40 repeat-like superfamily protein:
AT5G54720	Ankyrin repeat family protein:
AT5G55040	DNA-binding bromodomain-containing protein:
AT5G55390	ENHANCED DOWNY MILDEW 2:Encodes EDM2 (enhanced downy mildew 2). The predicted protein bears typical features of transcriptional regulators. EDM2 contains two putative bipartite nuclear localization signals (NLS) two zinc-finger-like motifs, a Proline-rich region and a large aspartic acid-rich region. Both zinc-finger-like stretches resemble the PHD (plant homeodomain) finger motif. Mutations in E…
AT5G55600	agenet domain-containing protein / bromo-adjacent homology (BAH) domain-containing protein:
AT5G56130	Transducin/WD40 repeat-like superfamily protein:Encodes a component of the putative Arabidopsis THO/TREX complex: THO1 or HPR1 (At5g09860), THO2 (At1g24706), THO3 or TEX1 (At5g56130), THO5 (At5g42920, At1g45233), THO6 (At2g19430), and THO7 (At5g16790, At3g02950). THO/TREX complexes in animals have been implicated in the transport of mRNA precursors. Mutants of THO3/TEX1, THO1, THO6 accumulate red…
AT5G58610	PHD finger transcription factor, putative:
AT5G58620	zinc finger (CCCH-type) family protein:
AT5G58760	damaged DNA binding 2:Encodes a DDB1a interacting protein DDB2 required for UV-B tolerance and genomic integrity.
AT5G59920	Cysteine/Histidine-rich C1 domain family protein:Isolated in a screen for UV-B insensitive mutants using a hypocotyl growth inhibition assay. Mutants are defective in a number of UV-B responses.
AT5G60410	DNA-binding protein with MIZ/SP-RING zinc finger, PHD-finger and SAP domain:Encodes a plant small ubiquitin-like modifier (SUMO) E3 ligase that is a focal controller of Pi starvation-dependent responses. Also required for SA and PAD4-mediated R gene signalling, which in turn confers innate immunity in Arabidopsis. Also involved in the regulation of plant growth, drought responses and freezing tol…
AT5G60940	Transducin/WD40 repeat-like superfamily protein:
AT5G61230	Ankyrin repeat family protein:
AT5G63320	nuclear protein X1:Encodes NPX1 (Nuclear Protein X1), a nuclear factor regulating abscisic acid responses.
AT5G63700	zinc ion binding;DNA binding:
AT5G64220	Calmodulin-binding transcription activator protein with CG-1 and Ankyrin domains:
AT5G64610	histone acetyltransferase of the MYST family 1:Encodes an enzyme with histone acetyltransferase activity. HAM1 primarily acetylate histone H4, but also display some ability to acetylate H3. Prior acetylation of lysine 5 on histone H4 reduces radioactive acetylation by either HAM1. HAM1 acetylates histone H4 lysine 5.
AT5G64630	Transducin/WD40 repeat-like superfamily protein:Chromatin Assembly Factor-1 (CAF-1) p60 subunit. Involved in organization of the shoot and root apical meristems. In Arabidopsis, the three CAF-1 subunits are encoded by FAS1, FAS2 and, most likely, MSI1, respectively. Mutations in FAS1 or FAS2 lead to increased frequency of homologous recombination and T-DNA integration in Arabidopsis.
AT5G64730	Transducin/WD40 repeat-like superfamily protein:
AT5G65630	global transcription factor group E7:This gene is predicted to encode a bromodomain-containing protein. Plant lines expressing RNAi constructs targeted against GTE7 show some resistance to agrobacterium-mediated root transformation.
AT5G65860	ankyrin repeat family protein:
AT5G66055	ankyrin repeat protein:A locus involved in embryogenesis. Mutations in this locus result in embryo lethality.
AT5G66240	Transducin/WD40 repeat-like superfamily protein:
AT5G67320	WD-40 repeat family protein:Encodes a WD-40 protein involved in histone deacetylation in response to abiotic stress.Identified in a screen for mutations with altered expression of stress induced genes. Functions as a repressor of cold tolerance induced genes. Loss of function mutants are hypersensitive to freezing.
